# Supplementary material for: Identification of a secondary Q-marker in high-quality ecotypes of Carthamus tinctorius L. and exploration of the target preference
Source: Royal Society of Chemistry journal article supplement (doi:10.1039/d2fo02596e), 2023-01-01

# XJM-N

XIC of -MRM (655 pairs): 353.088/191.050 amu Expected RT: 2.9 ID: mws2108 from Sample 32 (A20093799a\_N) of MWXS-19-1052Y-05-1\_12\_...

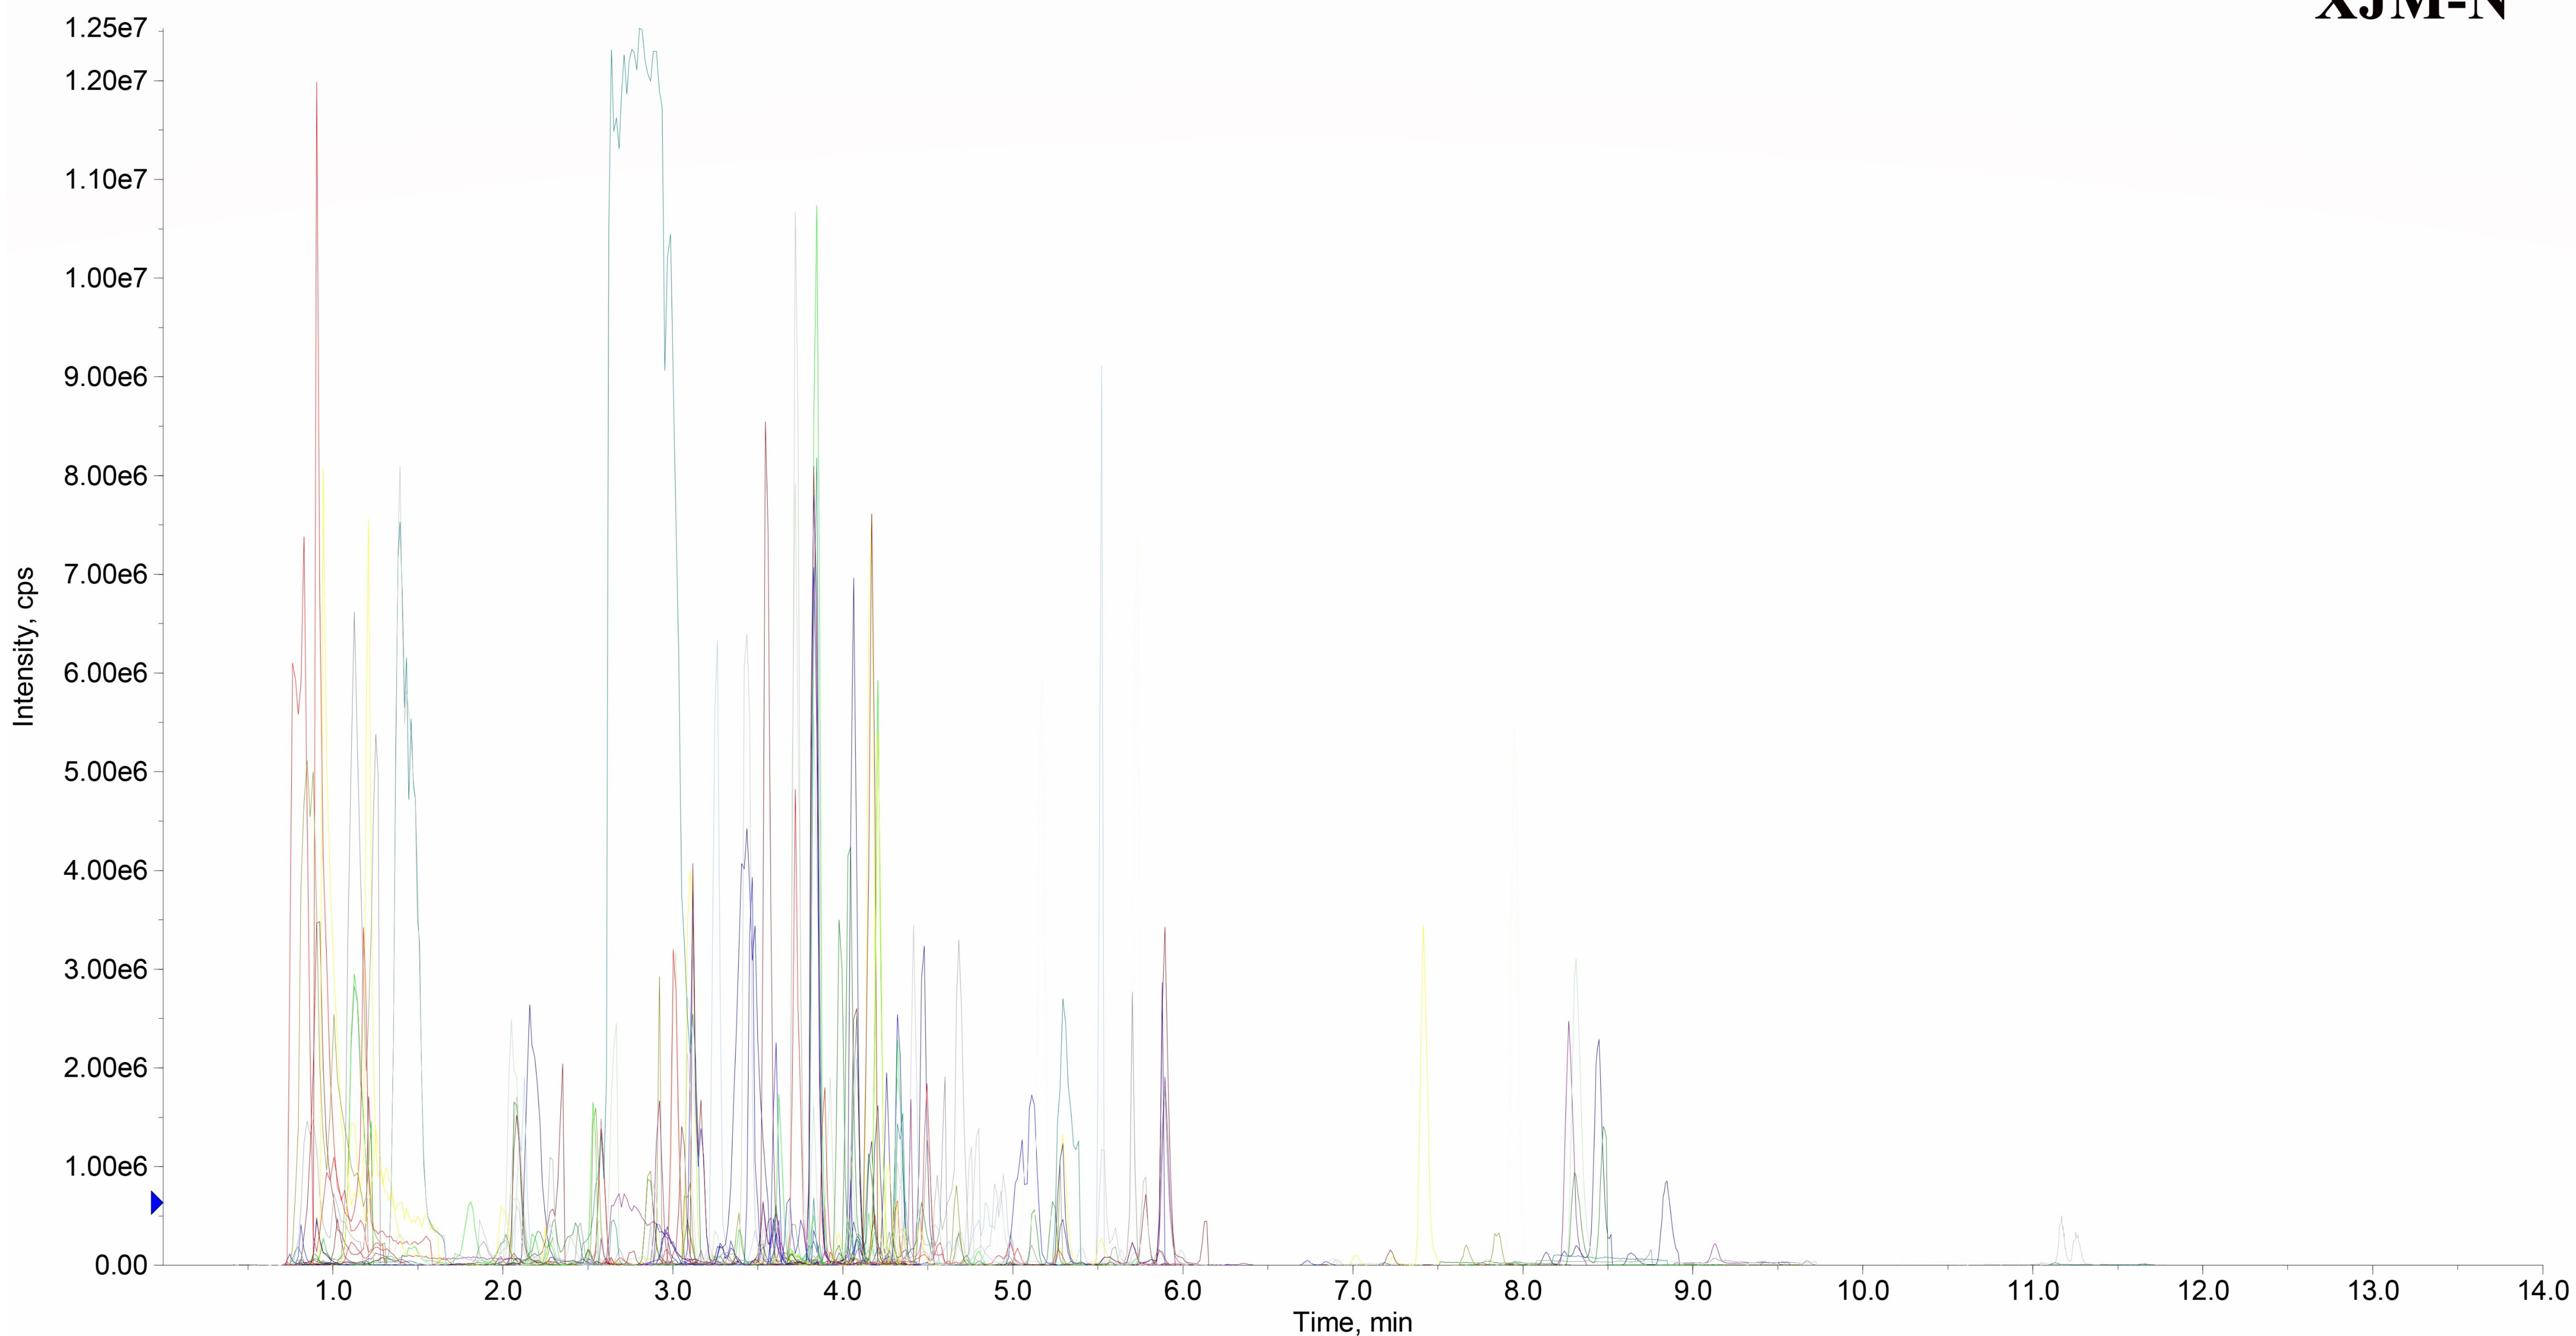

# XJM-P

XIC of +MRM (651 pairs): 132.102/69.000 amu Expected RT: 1.0 ID: pme0274 from Sample 14 (A20093799a\_P) of MWXS-19-1052Y-05-1\_12\_J...

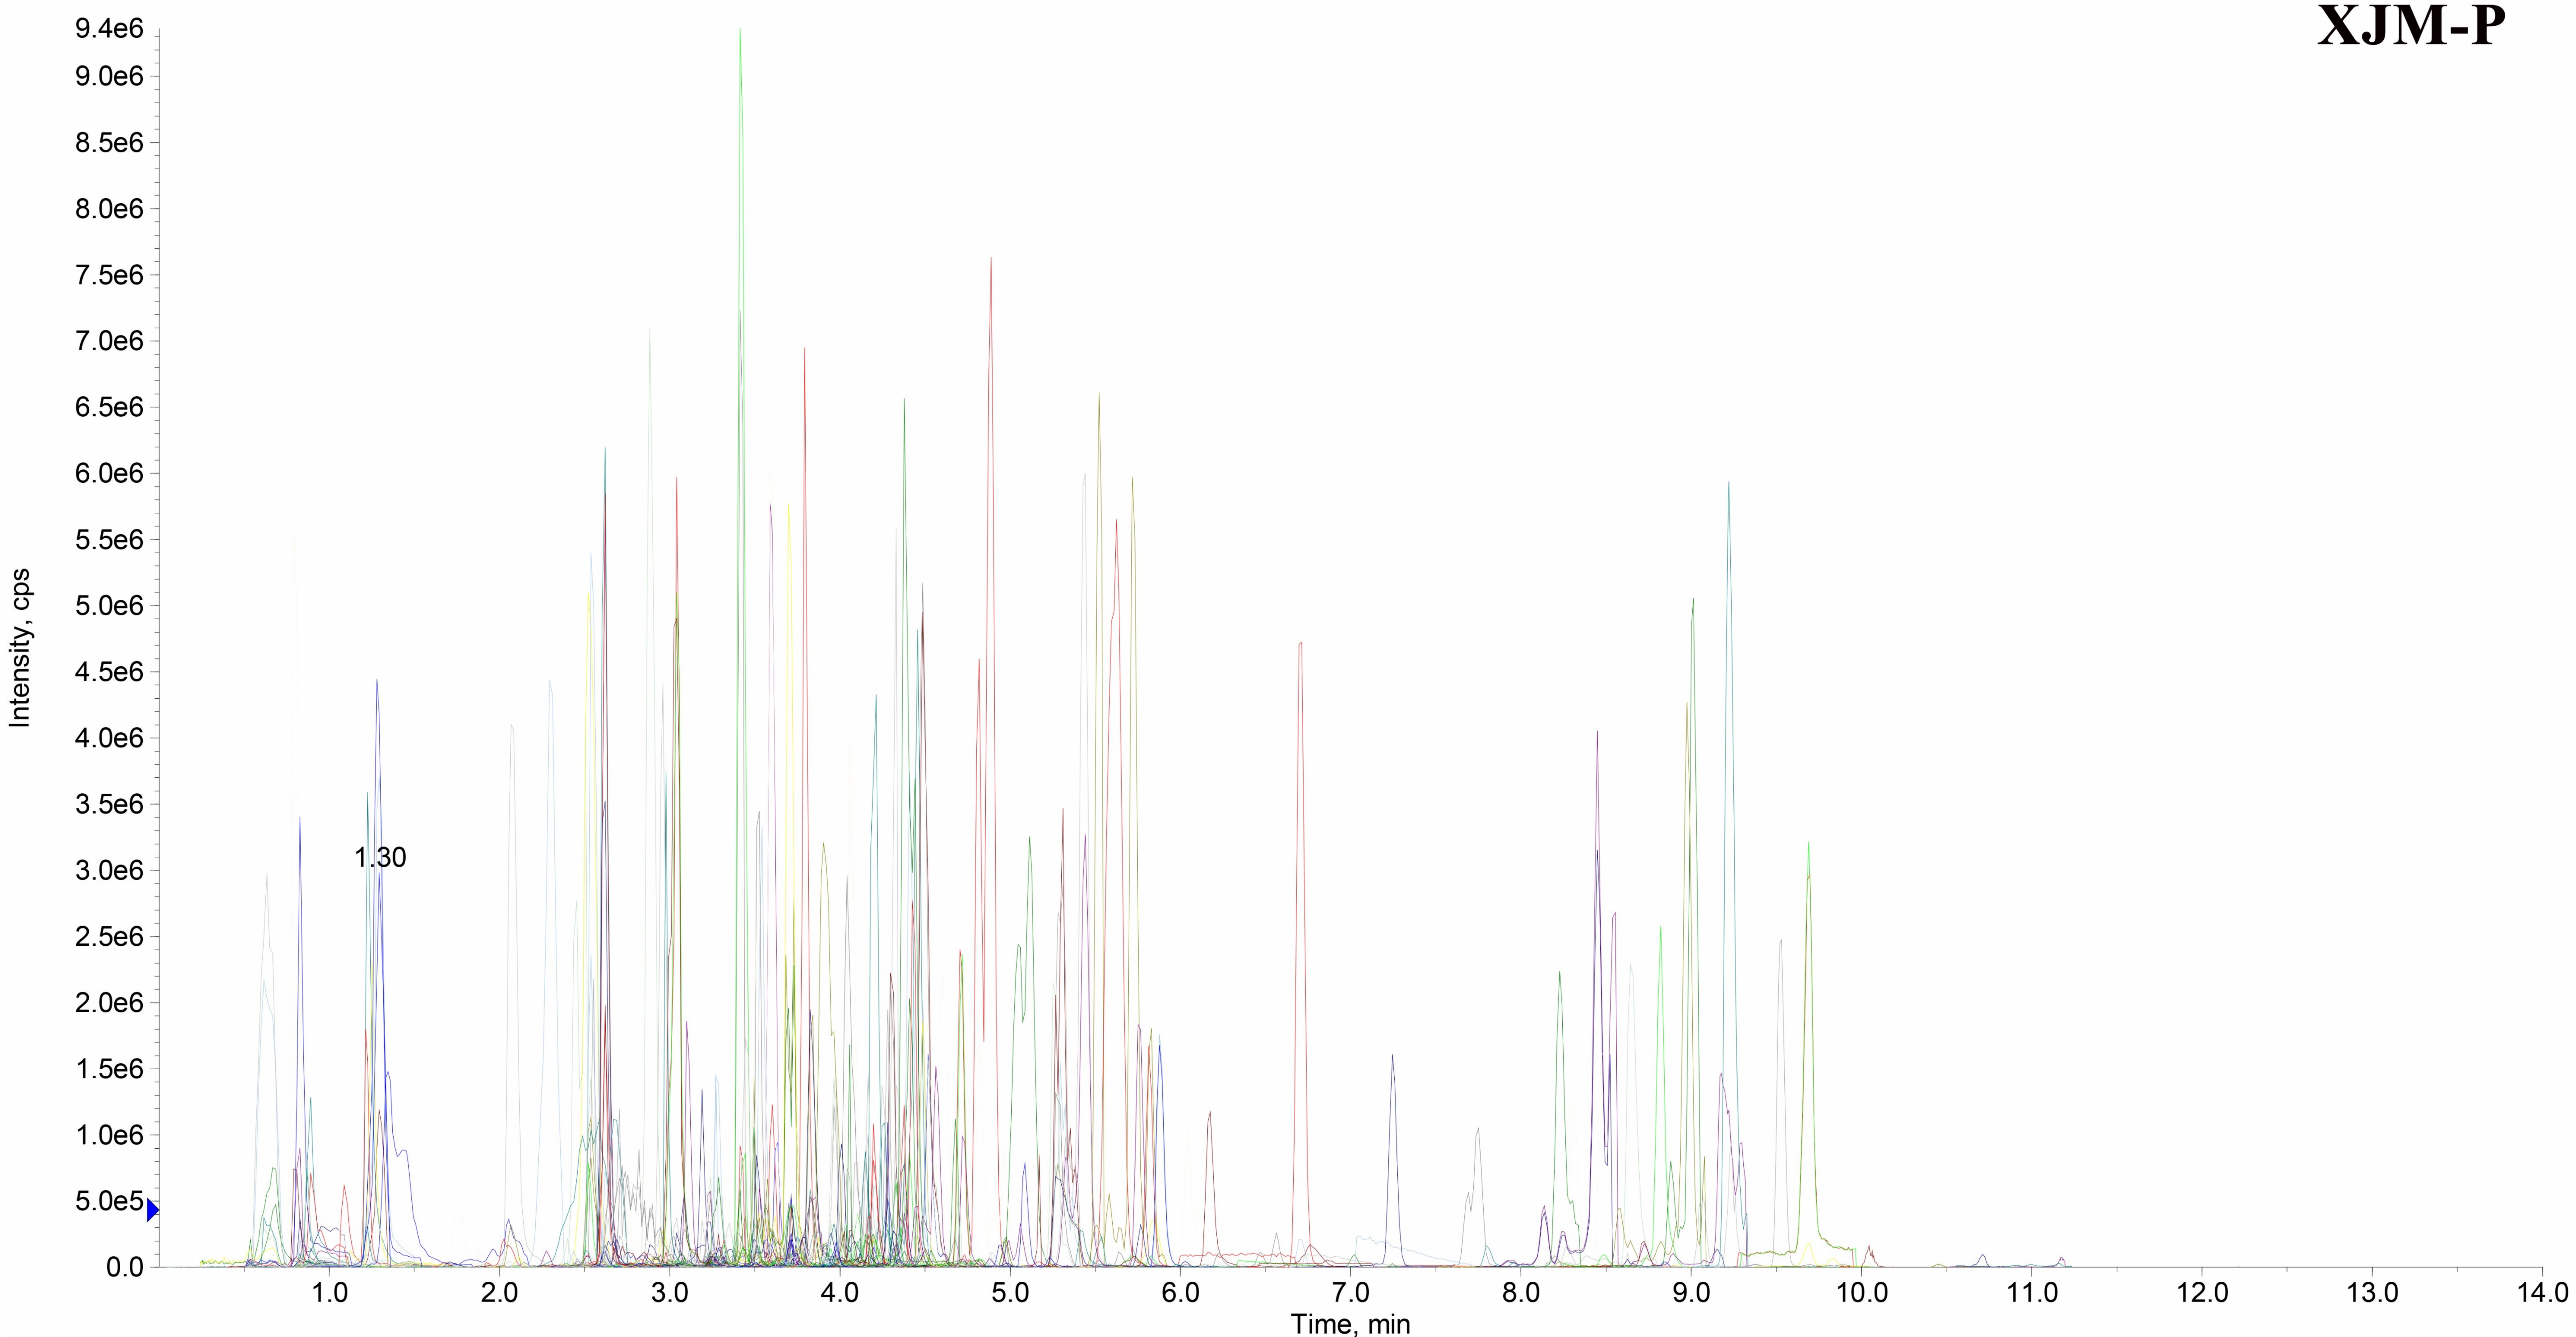

Supplement: d2fo02596e3.pdf [file d2fo02596e3.pdf]
