# Supplementary material for: Identification of a secondary Q-marker in high-quality ecotypes of Carthamus tinctorius L. and exploration of the target preference
Source: Royal Society of Chemistry journal article supplement (doi:10.1039/d2fo02596e), 2023-01-01
Supplement: d2fo02596e8.pdf [file d2fo02596e8.pdf]

**Table S1.** List of *Carthamus tinctorius* L. samples used in this study

| Sample number | Tissue | Sampling site                       | Longitude | Latitude  |
|---------------|--------|-------------------------------------|-----------|-----------|
| SCM1          | Flower | Jiayang City, Sichuan               | 104.55    | 30.42     |
| SCM2          | Flower | Xindu District, Chengdu, Sichuan    | 104.14    | 30.81     |
| SCM3          | Flower | Wenjiang District, Chengdu, Sichuan | 103.81401 | 30.692594 |
| YNM1          | Flower | Dali City, Yunnan                   | 100.31382 | 25.681749 |
| YNM2          | Flower | Linchang City, Yunnan               | 100.14621 | 24.413066 |
| YNM3          | Flower | Kunming City, Yunnan                | 102.83542 | 24.893876 |
| HNM1          | Flower | Jiaozuo City, Henan                 | 113.08772 | 34.947792 |
| HNM2          | Flower | Mengzhou City, Henan                | 112.70138 | 34.89631  |
| HNM3          | Flower | Shangqiu City, Henan                | 115.63313 | 34.396614 |
| XJM1          | Flower | Tacheng City, Xinjiang              | 82.997491 | 46.209646 |
| XJM2          | Flower | Hashake City, Xinjiang              | 81.324793 | 43.935395 |
| XJM3          | Flower | Changji City, Xinjiang              | 87.308675 | 44.02038  |
