# Supplementary material for: Identification of a secondary Q-marker in high-quality ecotypes of Carthamus tinctorius L. and exploration of the target preference
Source: Royal Society of Chemistry journal article supplement (doi:10.1039/d2fo02596e), 2023-01-01
Supplement: d2fo02596e9.xlsx [file d2fo02596e9.xlsx]

## Sheet: Sheet1
Table S2. Supplementary file of Secondary Metabolome data
Index	Q1 (Da)	Q3 (Da)	Molecular Weight (Da)	Formula	Ionization model	Compounds	Class I	Class II	cpd_ID	kegg_map	CAS	SCM1	SCM2	SCM3	YNM1	YNM2	YNM3	HNM1	HNM2	HNM3	XJM1	XJM2	XJM3	mix01	mix02	mix03
pmb0782	86.1	69.2	85.089	C5H11N	[M+H]+	Piperidine	Alkaloids	Alkaloids	C01746	ko00960	110-89-4	9390200	10743000	7742800	9616100	9259200	10358000	10140000	11382000	9468500	15052000	11906000	12358000	11323000	12339000	9063600
pme2292	89.11	72.08	88.1	C4H12N2	[M+H]+	Putrescine	Alkaloids	Phenolamine	C00134	ko00330,ko00472,ko00480,ko00960,ko01100,ko01110,ko02010	110-60-1	2830200	2639600	2693700	2175500	2277400	2197500	1943900	1952200	2145300	2183200	2158200	2163100	2399700	2344000	2261400
Lmgn002679	93.03	75.02	94.042	C6H6O	[M-H]-	Phenol	Phenolic acids	Phenolic acids	C00146	ko00350,ko01100	108-95-2	7704.3	6664.8	8503.4	2686.5	3754.2	4560.4	6434.7	5665.2	6657.6	6014.9	4875.8	3115.2	6047	6434.2	7665.1
pma6298	96.04	68.05	95.037	C5H5NO	[M+H]+	3-Hydroxypyridine	Alkaloids	Alkaloids	--	--	109-00-2	514430	538640	504240	41198	37625	39612	533630	588250	552860	246280	212840	294270	370440	380310	335000
pmb0484	104.1	60.1	103.091	C5H13NO	[M+H]+	Choline	Alkaloids	Alkaloids	C00114	ko00260,ko00564,ko01100,ko02010	62-49-7	12157000	11673000	12433000	12245000	12261000	11523000	16160000	15944000	16163000	16141000	15604000	15023000	14196000	14460000	13741000
ML10172161	103	59.01	104.011	C3H4O4	[M-H]-	Hydroxypyruvic acid	Others	Others	C00168	ko00260,ko00630,ko01100,ko01110,ko01200	1113-60-6	1307800	1428200	1297300	1706500	1608700	1858300	1838100	1883500	1943300	1343100	1224300	1469600	1561600	1510000	1456800
pme2433	106.09	88	105.079	C4H11NO2	[M+H]+	Diethanolamine	Alkaloids	Alkaloids	C06772	ko00564	111-42-2	30896	47930	31453	33965	45560	29077	44033	42974	38625	47429	44113	41388	35001	36207	41192
HJAP104	107.05	77.04	106.041	C7H6O	[M+H]+	Benzaldehyde	Phenolic acids	Phenolic acids	C00261	ko01100	100-52-7	1730000	1689100	1569000	4843300	4232000	4568600	387210	352970	307140	676650	775030	1001100	1703100	1761600	1657400
MA10014775	109.03	81.03	110.037	C6H6O2	[M-H]-	Hydroquinone	Phenolic acids	Phenolic acids	C00530	ko00350,ko01100	123-31-9	12223	15690	16649	17212	7542.4	9031.4	6093.9	7791.6	7852.4	7449.5	8452	7945.5	9245.6	10108	12294
mws0177	111.01	67	112.016	C5H4O3	[M-H]-	2-Furoic acid	Others	Others	C01546	ko01100	88-14-2	351410	312570	368080	2190700	1811200	2009100	533120	485120	487470	249430	284540	248550	688790	671020	724790
mws0376	115	71	116.011	C4H4O4	[M-H]-	Fumaric acid	Others	Others	C00122	ko00020,ko00190,ko00220,ko00250,ko00350,ko00360,ko00620,ko00650,ko00760,ko01100,ko01110,ko01200	110-17-8	34119	35532	23612	12175	8697.9	10787	8388.8	9	9	9014.9	9189.2	7385.5	15744	14181	9678.1
mws0823	115.04	71	116.047	C5H8O3	[M-H]-	3-Methyl-2-Oxobutanoic acid	Others	Others	C00141	ko00280,ko00290,ko00770,ko00966,ko01100,ko01110,ko01210,ko01230	759-05-7	357130	412410	365460	43552	27449	37362	154410	185560	156760	70865	53642	65887	146810	172310	138670
pme2935	115	69	116.047	C5H8O3	[M-H]-	2-Oxovaleric acid	Others	Others	C06255	--	1821-02-9	11259	12147	12317	9	1751	9	5030	4592.1	4496.9	2279.5	9	9	4746.9	3881.3	4873.2
pmb1096	118.07	91	117.058	C8H7N	[M+H]+	Indole	Alkaloids	Plumerane	C00463	ko00380,ko00400,ko00402,ko01100,ko01110	120-72-9	98290	92662	96798	114880	101200	97097	111550	113230	112740	120300	124210	114260	93805	91629	103050
mws0191	118.09	59	117.079	C5H11NO2	[M+H]+	Betaine	Alkaloids	Alkaloids	C00719	ko00260,ko01100,ko02010	107-43-7	11184000	11538000	12307000	26433000	22102000	24886000	2406500	2486300	1886800	7499400	6593800	9116400	12768000	11326000	11621000
mws0192	117.02	73	118.027	C4H6O4	[M-H]-	Succinic acid*	Others	Others	C00042	ko00020,ko00190,ko00250,ko00310,ko00350,ko00360,ko00620,ko00630,ko00640,ko00650,ko00760,ko00920,ko01100,ko01110,ko01200	110-15-6	31715000	32532000	30844000	26242000	25010000	24898000	37753000	40913000	40878000	54039000	49090000	47745000	35582000	39502000	35329000
pme2923	117	75	118.027	C4H6O4	[M-H]-	Acetoxyacetic acid	Others	Others	--	--	13831-30-6	427230	382820	433870	33267	47750	28975	131360	154270	133260	162950	151240	158420	201840	219600	211760
mws0470	117.02	73	118.027	C4H6O4	[M-H]-	Methylmalonic acid*	Others	Others	C02170	ko00240,ko00280,ko00640,ko01100	516-05-2	32361000	30804000	30420000	23854000	23850000	25954000	37309000	41450000	40862000	53919000	48252000	45738000	34736000	39643000	35831000
mws0640	117.06	71	118.063	C5H10O3	[M-H]-	2-Hydroxy-2-methylbutyric acid	Others	Others	--	--	3739-30-8	3119.3	2257.4	1935	5475.1	6823.1	6564.7	1826.5	2261	1290.9	1720.4	1826.4	2472.8	2150.2	3228.7	3657.3
mws0147	117.06	59	118.063	C5H10O3	[M-H]-	β-Hydroxyisovaleric acid	Others	Others	C20827	ko00280,ko01100	625-08-1	860680	832590	778710	3364300	3633200	3377200	892520	870100	905170	907320	1077100	1045200	1249700	1298200	1426000
pme3096	118	74	119.022	C3H5NO4	[M-H]-	Aminomalonic acid	Others	Others	C00872	--	1068-84-4	1132500	1150400	1126300	907890	841820	895700	1360500	1509400	1472100	2057500	1851600	1717600	1293300	1414800	1303100
pmp001287	120.08	103.05	119.073	C8H9N	[M+H]+	N-Benzylmethylene isomethylamine	Alkaloids	Alkaloids	--	--	-	12730000	12638000	12204000	11541000	12493000	12368000	13061000	13432000	13303000	15604000	13532000	14259000	12236000	12627000	13073000
Lmbp000728	121.06	77.04	120.058	C8H8O	[M+H]+	(S)-2-Phenyloxirane	Others	Others	C20782	ko01100	20780-54-5	95535000	96874000	95779000	8385600	9186000	8693200	16080000	13269000	12405000	11463000	10304000	11884000	42361000	37772000	35567000
Lmbn002737	119.05	93.03	120.058	C8H8O	[M-H]-	3-Methylbenzaldehyde	Others	Others	C07209	ko01100	620-23-5	311690	346170	284080	101090	90686	115630	140280	147330	115260	126550	140820	119380	169690	149990	148920
pmb0069	122	105	121.053	C7H7NO	[M+H]+	Benzamide	Phenolic acids	Phenolic acids	C09815	--	55-21-0	35976	48198	42763	43632	45669	43409	49973	42753	50383	56859	46685	58342	47821	50574	44710
pme0241	123.04	79	122.037	C7H6O2	[M+H]+	Benzoic acid	Phenolic acids	Phenolic acids	C00180	ko00360,ko01100,ko01110	65-85-0	114310	94396	108200	36536	43341	34866	84530	90755	90235	52472	52034	77586	86396	72285	81645
Lmbn001930	121.03	77.04	122.037	C7H6O2	[M-H]-	2-Hydroxybenzaldehyde (Salicylaldehyde)	Phenolic acids	Phenolic acids	C06202	ko01100	90-02-8	61272	50208	45849	15251	16199	19577	46055	48857	35623	7062.8	14855	13588	25557	35555	32670
mws0628	121.03	92	122.037	C7H6O2	[M-H]-	4-Hydroxybenzaldehyde	Phenolic acids	Phenolic acids	C00633	ko01100	123-08-0	20653000	20087000	19853000	1566400	2488200	1841400	6729700	6591300	6458700	4235400	4411300	3825800	7332300	6670000	6438600
Lmgp002593	123.04	77.04	122.037	C7H6O2	[M+H]+	3-hydroxybenzaldehyde	Others	Others	C03067	--	100-83-4	125880	191130	196630	213010	198510	156840	48291	41793	32966	87837	44890	77607	85593	110160	83936
ML10179289	105.07	77.04	122.073	C8H10O	[M+H-H2O]+	2-Phenylethanol	Phenolic acids	Phenolic acids	C05853	ko00360	60-12-8	860300	952930	967840	663000	614030	664990	585480	550140	541870	543160	629390	520940	530760	667410	678270
pme1216	122.03	78	123.032	C6H5NO2	[M-H]-	2-Picolinic acid	Others	Others	C10164	ko00380,ko01100	98-98-6	1674300	1683500	1415200	1808500	1900000	1923700	1931500	1947600	1615200	1577700	1936700	1890200	1535700	1603000	1858000
mws0982	126.1	68	125.095	C6H11N3	[M+H]+	1-Methylhistamine	Alkaloids	Alkaloids	C05127	ko00340,ko01100	501-75-7	10191	8650.3	9171.6	9555.4	6647.5	9190.6	11314	7377.3	7840.3	8261.1	6727.2	11235	9232.8	6196.6	6234.8
NK10264324	127.04	81.03	126.032	C6H6O3	[M+H]+	1,3,5-Benzenetriol	Phenolic acids	Phenolic acids	C02183	--	108-73-6	114420	128670	145720	113880	123130	71475	65766	76206	61619	101020	78466	74193	73935	60467	79412
pmp001086	127.04	97	126.032	C6H6O3	[M+H]+	5-Hydroxymethylfurfural	Phenolic acids	Phenolic acids	C11101	--	67-47-0	89521	84908	77459	52488	49394	64296	70344	83649	62238	60498	73359	50251	68017	71863	58676
pmb0812	127.1	81.2	126.043	C5H6N2O2	[M+H]+	Imidazole-4-acetate	Alkaloids	Plumerane	C02835	ko00340,ko01100	645-65-8	106800	114120	73999	203550	245190	133580	160280	166950	168890	179100	177740	148300	125240	194780	145480
Lmbn000612	128.04	82.03	129.043	C5H7NO3	[M-H]-	1-Pyrroline-4-hydroxy-2-carboxylic acid	Others	Others	C04282	ko00330,ko01100	9054-77-7	28958	26704	23275	14778	23707	24367	80555	81663	68690	32811	36487	34576	32639	32310	43187
Zmgn000217	129.02	85.03	130.027	C5H6O4	[M-H]-	Methylenesuccinic acid	Others	Others	C00490	ko00660,ko01100	97-65-4	74634	76728	96644	75058	75992	58981	161380	123830	145970	93653	65803	68180	96376	94638	75896
mws0425	129.02	85	130.027	C5H6O4	[M-H]-	Citraconic acid	Others	Others	C02226	ko00290,ko00660,ko01100,ko01210	498-23-7	774880	899050	861170	2504900	2594700	2609800	2190600	2173500	2038800	2828100	2751900	2620300	2003800	1913500	1794600
pmb0501	131.13	114.1	130.122	C5H14N4	[M+H]+	Agmatine	Alkaloids	Phenolamine	C00179	ko00330,ko01100	306-60-5	305190	292160	308380	197530	162740	173460	333720	293610	338180	182420	204990	208440	275200	260220	267940
Zmpn000638	130.05	88.04	131.069	C4H9N3O2	[M-H]-	3-Guanidinopropionic acid	Others	Others	C03065	--	353-09-3	110010	102490	108960	90805	119920	108250	133050	135280	101290	66811	121110	106380	64366	70867	114490
ML10197929	130.09	88.04	131.069	C4H9N3O2	[M-H]-	Creatine	Others	Others	C00300	ko00260,ko00330,ko01100	57-00-1	661720	604180	669710	948920	1029100	965810	1092300	1248900	1199900	1312000	1180100	1193200	962800	1028800	1049200
pmp001198	132.1	57.1	131.095	C6H13NO2	[M+H]+	6-Deoxyfagomine	Alkaloids	Alkaloids	--	--	197449-09-5	11720000	13111000	10177000	13010000	11587000	12219000	12833000	14399000	11277000	17681000	14321000	16995000	14167000	14441000	11461000
mws1167	131	59.2	132.006	C4H4O5	[M-H]-	Oxaloacetic acid	Others	Others	C00036	ko00010,ko00020,ko00250,ko00620,ko00630,ko00710,ko01100,ko01110,ko01200,ko01210,ko01230	328-42-7	42660	38083	55228	29080	26765	26366	36803	37618	50852	30500	32727	31273	41402	39174	36386
pme0243	131.03	87.05	132.042	C5H8O4	[M-H]-	Glutaric acid	Others	Others	C00489	ko00071,ko00310,ko01100	110-94-1	1121700	1220400	1397500	1169500	1095900	1247800	2509800	2438400	2707900	2378800	2215600	1905400	1691500	1772400	1586100
Lmbn001364	131.03	87.05	132.042	C5H8O4	[M-H]-	4-Hydroxy-2-Oxopentanoic Acid	Others	Others	C03589	ko00360,ko01100	3318-73-8	140210	126180	118970	267690	242740	256720	262890	292640	219980	258160	240550	238540	192360	218310	218710
Lmgn000160	131.05	70.03	132.053	C4H8N2O3	[M-H]-	3-Ureidopropionic Acid	Others	Others	C02642	ko00240,ko00410,ko00770,ko01100	462-88-4	627970	594410	590830	579720	592880	542220	679860	667470	623150	578690	617170	515010	626550	620460	677410
Lmrn002746	131.07	85.07	132.079	C6H12O3	[M-H]-	2-Hydroxy-4-methylpentanoic acid	Others	Others	--	--	498-36-2	177240	200010	142810	145170	113240	151910	189720	176130	230740	168680	231050	238260	158070	132390	180450
mws0341	131.07	85	132.079	C6H12O3	[M-H]-	2-Hydroxyisocaproic acid	Others	Others	C03264	--	20312-37-2	1105500	1564900	1532900	1670500	1640800	1563000	1896700	1824600	3039900	1500400	1621700	1546000	1706400	1584100	1839400
Lmbn000198	133.01	71.01	134.022	C4H6O5	[M-H]-	3-Dehydro-L-Threonic Acid*	Others	Others	C03064	ko00053,ko01100	-	10454000	12069000	10239000	7025700	6876400	6415700	6839600	6272400	6684400	8309300	7882000	7402200	7916200	7913300	8051700
mws0275	133.01	71.01	134.022	C4H6O5	[M-H]-	L-Malic acid*	Others	Others	C00149	ko00020,ko00620,ko00630,ko00710,ko01100,ko01110,ko01200	97-67-6	35739000	38810000	35363000	24669000	25481000	24973000	24833000	22124000	24804000	29694000	28350000	26380000	26899000	28698000	29227000
HJKP000649	136.07	91.05	135.068	C8H9NO	[M+H]+	N-benzylformamide	Alkaloids	Alkaloids	C15561	--	6343-54-0	8186700	9293000	4866300	4974700	4207700	4979900	4414000	5884000	3359900	5642600	4150800	5846700	4722000	5859500	4644200
Zmyn002919	135.04	91.05	136.052	C8H8O2	[M-H]-	2-Methylbenzoic acid	Phenolic acids	Phenolic acids	C07215	ko01100	118-90-1	2941	4354.8	4236	4361.7	4746.2	4195.5	7189.2	6507.2	5850.8	3993.5	4325.6	4233.6	5196.1	4355.8	5507.7
Hmbn002174	135.05	120.02	136.053	C8H8O2	[M-H]-	4-Hydroxyacetophenone	Phenolic acids	Phenolic acids	C10700	ko01100	99-93-4	293190	234870	257400	81730	141010	151840	155570	182820	179320	137640	119930	151110	138530	219060	193020
pme2268	138.05	94.07	137.048	C7H7NO2	[M+H]+	Trigonelline	Alkaloids	Alkaloids	C01004	ko00760	535-83-1	416910	425840	398240	429550	397060	390130	469230	513870	458950	480910	435680	401200	456660	440370	438870
mws0146	138.05	78	137.048	C7H7NO2	[M+H]+	Nicotinic Acid Methyl Ester(Methyl Nicotinate)	Alkaloids	Alkaloids	--	--	93-60-7	40487	35542	38067	12484	18285	8553.8	21218	43613	23257	24289	26334	28697	23347	33214	19697
mws1336	138.06	120	137.048	C7H7NO2	[M+H]+	4-Aminobenzoic acid	Phenolic acids	Phenolic acids	C00568	ko00790,ko01100	150-13-0	41654	37380	46791	31830	37199	24087	24990	27385	24721	31003	27160	26316	22058	38798	32849
pme1738	138.08	95	137.071	C7H9N2O	[M+H]+	3-Carbamyl-1-methylpyridinium(1-Methylnicotinamide)	Alkaloids	Alkaloids	C02918	ko00760,ko01100	1005-24-9	52250	53027	61417	56106	49798	52710	70896	71843	66676	66508	54305	53380	66206	61704	53492
pma0948	138.09	121.1	137.084	C8H11NO	[M+H]+	Phenylethanolamine	Alkaloids	Alkaloids	C02735	--	7568-93-6	18017000	20828000	21605000	1280600	1424200	1295300	2765400	1927200	2131700	1566000	1688700	1688500	4211900	5014800	5608800
mws0749	137.02	93	138.032	C7H6O3	[M-H]-	4-Hydroxybenzoic acid	Phenolic acids	Phenolic acids	C00156	ko00130,ko00790,ko01100,ko01110	99-96-7	2295100	2040700	1981400	1420800	1412300	1313200	1173300	1318700	1144700	923120	805170	1037600	1318500	1275600	1191600
Lmgn001670	137.03	108.02	138.032	C7H6O3	[M-H]-	Salicylic acid	Phenolic acids	Phenolic acids	C00805	ko00360,ko01100,ko01110,ko04075	69-72-7	2010500	1966300	1823500	740750	874340	870290	488540	690860	797080	591930	643280	594130	862810	1053800	1269200
Hmgn001653	137.02	93.04	138.032	C7H6O3	[M-H]-	Protocatechualdehyde	Phenolic acids	Phenolic acids	C16700	ko00950	139-85-5	38443000	37496000	38127000	25139000	28869000	24652000	20341000	23748000	22991000	17644000	17395000	16414000	21074000	22806000	22630000
mws2368	137.06	119.05	138.068	C8H10O2	[M-H]-	Tyrosol	Phenolic acids	Phenolic acids	C06044	ko00350,ko01100	501-94-0	240380	285190	235560	101180	102930	101320	77314	79715	93302	54356	69150	51119	131300	97482	111540
pme2828	140	99	139.027	C6H5NO3	[M+H]+	4-Nitrophenol	Phenolic acids	Phenolic acids	C00870	--	100-02-7	4763400	5701200	5077000	2961300	3742500	2959500	4772100	4947300	4906900	4379000	4793900	3964200	5003800	5452400	5442200
pme1137	140.03	94	139.027	C6H5NO3	[M+H]+	6-Hydroxynicotinic acid	Alkaloids	Alkaloids	C01020	ko00760,ko01100	5006-66-6	116700	106840	128830	678760	493660	618100	145570	189310	140430	122170	77090	151550	227730	249510	181650
mws0704	140.01	78.96	141.019	C2H8NO4P	[M-H]-	O-Phosphorylethanolamine	Alkaloids	Alkaloids	C00346	ko00564,ko00600,ko01100	1071-23-4	1350.1	1718	1131.8	1800	1766.3	2214.7	2322.4	1998.1	2334.1	2865.2	3121.9	3360.3	1339.8	2101.8	2210.7
pma2987	142.1	124.09	141.09	C6H11N3O	[M+H]+	Histidinol	Alkaloids	Alkaloids	C00860	ko00340,ko01100,ko01110,ko01230	501-28-0	13826000	13390000	14251000	14998000	16466000	16088000	15902000	15587000	15703000	14759000	15219000	15335000	14619000	14567000	14387000
pmb0764	144.05	113.2	143.04	C6H9NOS	[M+H]+	4-Methyl-5-thiazoleethanol	Others	Others	C04294	ko00730,ko01100	137-00-8	65800	79936	75798	27924	31367	38924	171260	177730	155680	81935	68673	65782	87698	78835	91080
MA10074217	144.05	115.04	145.053	C9H7NO	[M-H]-	4-Hydroxyquinoline	Alkaloids	Quinoline alkaloids	C06343	--	611-36-9	212700	209620	195020	107190	125180	145720	191130	181330	204610	142490	140630	142470	147830	151610	137870
pme0295	146.08	86	145.074	C6H11NO3	[M+H]+	4-Acetamidobutyric acid	Others	Others	C02946	ko00330,ko01100	3025-96-5	2413800	2519100	2395700	4453400	3612100	4021500	2554100	2832700	2489900	1929300	1699600	1882500	2585100	2661000	2610900
mws0567	146.09	87	145.085	C5H11N3O2	[M+H]+	4-Guanidinobutyric acid	Others	Others	C01035	ko00330,ko01100	463-00-3	4260400	4689100	3688800	2737800	2548900	2727300	3969700	4080800	3842900	3719700	3336200	3595300	3586500	3853700	3306700
pme2380	145.01	101	146.022	C5H6O5	[M-H]-	α-Ketoglutaric acid	Others	Others	C00026	ko00020,ko00040,ko00053,ko00220,ko00250,ko00300,ko00310,ko00340,ko00430,ko00630,ko00650,ko00660,ko01100,ko01110,ko01200,ko01210,ko01230	328-50-7	54232	55387	48297	22102	31353	33780	28846	28874	17275	57968	78193	41728	26629	36187	43630
mws1012	147.04	103	146.037	C9H6O2	[M+H]+	Coumarin	Lignans and Coumarins	Coumarins	C05851	ko00940,ko01110	91-64-5	9	9	9	9	9	9	9	9	9	12922	17054	11543	5685.4	4083.7	2931.4
Lmbn001609	145.05	83.05	146.058	C6H10O4	[M-H]-	2-Acetyl-2-Hydroxybutanoic Acid	Others	Others	C06006	ko00290,ko01100,ko01110,ko01210,ko01230	-	21436	24131	29504	24262	21918	22583	31155	38025	24364	14687	25705	20353	20667	15640	18727
pme3146	145.06	102	146.069	C5H10N2O3	[M-H]-	β-Ureidoisobutyric acid	Others	Others	C05100	--	2905-86-4	17970	15317	13319	11767	10998	27668	3977.5	2678.2	1874.2	3309.3	3221.8	4854.1	7176.8	10048	6024
pme1691	147.13	87.2	146.118	C7H16NO2	[M+H]+	Acetylcholine	Alkaloids	Alkaloids	C01996	ko00564	60-31-1	203610	190380	209530	143480	142470	116530	171250	156560	143070	152990	163280	135340	141590	148710	149490
pmp001285	149.02	65.04	148.016	C8H4O3	[M+H]+	Phthalic anhydride	Phenolic acids	Phenolic acids	--	--	85-44-9	439020	391750	371190	383600	355700	379150	1466800	1035000	1349900	581940	622060	614280	658310	633670	642280
Lmbn000216	147.03	57.03	148.037	C5H8O5	[M-H]-	3-Methylmalic acid*	Others	Others	C06032	ko00290,ko00660,ko01100,ko01210,ko01230	152204-30-3	552420	522060	693840	527210	536200	338910	624770	362750	496730	534410	606300	426330	451220	450030	414610
Zmyn000247	147.03	57.03	148.037	C5H8O5	[M-H]-	2-Hydroxyglutaric Acid*	Others	Others	C03196	ko00310,ko01100	13095-48-2	538700	542240	680210	487260	520270	371500	593900	349580	560290	566180	606620	420180	453890	437380	445410
mws2213	147.05	77.01	148.052	C9H8O2	[M-H]-	Cinnamic acid	Phenolic acids	Phenolic acids	C00423	ko00130,ko00360,ko00940,ko00998,ko01100,ko01110	140-10-3	3407.4	3173.9	4336.8	3322.5	2865.8	3130.8	10379	11082	9362.4	8125.8	7014.3	6115.4	7088.3	5338.4	5815.6
pme3154	147.07	59.01	148.074	C6H12O4	[M-H]-	Mevalonic acid	Others	Others	C00418	ko00900,ko01100,ko01110	150-97-0	835480	1288800	1160600	6853900	5396400	6851400	4693000	5143500	5129600	6147100	4496800	6078500	4775700	4424700	4235500
mws0262	149.01	87	150.016	C4H6O6	[M-H]-	L-Tartaric acid	Others	Others	C00898	ko00630,ko01100	87-69-4	104210	62596	68405	899520	1159500	951000	747730	752230	539890	799210	1025300	1062200	464680	673300	797370
mws0489	149.02	77	150.032	C8H6O3	[M-H]-	Benzoylformic acid	Others	Others	C02137	ko00360,ko01100	611-73-4	311060	313220	303740	133720	144070	160210	192800	193020	179550	145740	153480	136260	183460	178680	171650
Lmtp003569	152.06	106.06	151.063	C8H9NO2	[M+H]+	R-mandelamide	Alkaloids	Alkaloids	C07301	--	24008-62-6	24599	27866	23377	9	9	5497	258090	227740	214340	27938	32374	32807	87180	77447	80546
mws0458	151.04	136	152.047	C8H8O3	[M-H]-	Vanillin	Phenolic acids	Phenolic acids	C00755	ko00998,ko01100,ko01110	121-33-5	1383200	1373100	1434300	363860	334440	284870	1227800	1267000	1168100	1151500	1177500	1512600	1101000	1168700	1315500
pme2362	151.04	107	152.047	C8H8O3	[M-H]-	Mandelic acid	Phenolic acids	Phenolic acids	C01984	--	90-64-2	562960	600650	636940	210400	251670	234540	277280	345230	286190	234900	222210	221860	318990	290200	374090
pma0675	153.05	135.04	152.047	C8H8O3	[M+H]+	o-Anisic acid	Phenolic acids	Phenolic acids	--	--	579-75-9	113120	98637	110370	2358200	2380300	2396600	357970	368960	354320	1405200	1545000	2162300	1056900	1020500	1064000
mws0182	151.04	106.9	152.047	C8H8O3	[M-H]-	p-Hydroxyphenyl acetic acid	Phenolic acids	Phenolic acids	C00642	ko00350,ko00360,ko01100	156-38-7	341230	348550	295640	527290	405630	345120	212130	204240	145520	211420	237920	241400	266890	292450	235430
Zmyn002323	151.04	107.05	152.047	C8H8O3	[M-H]-	2-Hydroxyphenylacetic acid	Others	Others	C05852	ko00360,ko01100	614-75-5	142560	172740	180140	569870	560320	597430	68790	70107	45838	73309	83162	91485	160440	205300	173100
pme0221	153.05	121	152.047	C8H8O3	[M+H]+	Methyl salicylate	Phenolic acids	Phenolic acids	C12305	--	119-36-8	5093.2	3880.6	5639	4906.7	6844.3	6216.1	6624.2	7315.9	5677.4	6011.1	7427.4	5756	5883.4	5891.3	7753.2
mws0943	151.05	71.01	152.059	C7H8N2O2	[M-H]-	1,4-Dihydro-1-Methyl-4-oxo-3-pyridinecarboxamide	Alkaloids	Alkaloids	C05843	ko00760,ko01100	769-49-3	447820	487150	589150	2158700	1559300	1694700	107420	107110	105820	200140	200300	201590	500210	531530	479960
mws0596	154.05	136.04	153.043	C7H7NO3	[M+H]+	3-Hydroxyanthranilic acid	Others	Others	C00632	ko00380,ko01100	548-93-6	85704	78862	98764	61045	80429	69637	171910	161600	133400	213690	135340	163380	109520	130320	112300
ML10177402	152.03	108.05	153.043	C7H7NO3	[M-H]-	4-Aminosalicylic acid	Phenolic acids	Phenolic acids	C02518	--	65-49-6	33361	34103	34757	55641	62986	57800	28504	29761	34780	40480	49519	62061	30493	32234	46410
mws4002	154.09	137	153.079	C8H11NO2	[M+H]+	Dopamine	Alkaloids	Alkaloids	C03758	ko00350,ko00950,ko00965,ko01100,ko01110	51-61-6	55958	50384	43516	71574	93975	103970	13335	11251	7624	11456	18267	16181	33471	39282	43644
mws0180	153.02	109.03	154.027	C7H6O4	[M-H]-	2,5-Dihydroxybenzoic acid; Gentisic Acid*	Phenolic acids	Phenolic acids	C00628	ko00350,ko01100	490-79-9	8034500	8028100	7762300	5218900	5016200	5501700	3275600	3347800	3206300	3568000	4206400	3570500	3958900	4397800	4937000
mws0639	153.02	109.03	154.027	C7H6O4	[M-H]-	2,3-Dihydroxybenzoic Acid*	Others	Others	C00196	ko01110	303-38-8	7298400	7888000	7656400	5766900	4975900	5057400	2714100	3618800	3398600	3713200	3999200	4155800	4299200	4021700	4719700
mws0183	153.02	109.03	154.027	C7H6O4	[M-H]-	3,4-Dihydroxybenzoic acid (Protocatechuic acid)*	Phenolic acids	Phenolic acids	C00230	ko01100,ko01110	99-50-3	7782600	7182000	7215100	4951000	4829700	5059700	3333300	3762200	3117200	3521200	3770400	4263400	4184900	4086900	4242500
MA10040889	154.01	123.01	155.022	C6H5NO4	[M-H]-	4-Nitrocatechol	Phenolic acids	Phenolic acids	C02235	--	3316-09-4	94173	90221	82820	412090	418510	387160	34772	54888	44817	10691	7860.3	14073	104910	145070	98802
pmb0819	157	130	156.069	C10H8N2	[M+H]+	3-Indoleacetonitrile	Alkaloids	Plumerane	C02938	ko00380,ko01100	771-51-7	38532	34213	35958	49053	44625	45645	49274	47928	47863	53684	61332	64773	41696	44418	46410
pme2589	159.1	87	160.037	C6H8O5	[M-H]-	2-Oxoadipic acid	Others	Others	C00322	ko00300,ko00310,ko00380,ko01100,ko01110,ko01210,ko01230	3184-35-8	22080	13380	18907	9927.1	8842	16611	8566.1	10497	9502.7	48025	67931	28915	15575	21468	23656
Zmjn001813	159.07	97.06	160.074	C7H12O4	[M-H]-	Pimelic acid	Others	Others	C02656	ko00780,ko01100	111-16-0	134000	135310	128610	158350	141380	149600	69557	83642	56719	107900	82182	99586	96586	95885	100820
mws0005	161.11	144	160.1	C10H12N2	[M+H]+	Tryptamine	Alkaloids	Plumerane	C00398	ko00380,ko00901,ko01100,ko01110	61-54-1	1193100	1266700	1166800	1341400	1265500	1356500	809330	802050	835230	844340	955200	763760	1033000	1138600	1030400
Lmgp001898	162.06	116.05	161.048	C9H7NO2	[M+H]+	4,6-Dihydroxyquinoline	Alkaloids	Quinoline alkaloids	C05639	ko00380,ko01100	3517-61-1	133080	136760	132530	179710	149880	156990	151680	151900	134970	126790	142110	154390	125870	115790	120000
mws1417	160.04	116	161.048	C9H7NO2	[M-H]-	Indole-3-carboxylic acid	Alkaloids	Plumerane	C19837	--	771-50-6	2188800	2254700	2116300	3282100	2945600	2984100	1277700	1169200	1337400	1231700	1163000	1309100	1619600	1849800	1952200
mws1346	162.08	98	161.069	C6H11NO4	[M+H]+	DL-2-Aminoadipic acid	Alkaloids	Alkaloids	C00956	ko00300,ko00310,ko00311,ko01100,ko01110,ko01210,ko01230	542-32-5	1220800	1243900	1297900	494670	449490	522500	618090	597550	562770	662620	686160	530080	717920	618610	677010
mws1320	160.08	130.07	161.084	C10H11NO	[M-H]-	Tryptophol	Alkaloids	Plumerane	C00955	ko00380	526-55-6	6185.4	9399.9	10309	11249	9626	10668	4987.7	6257.7	5599.1	6518.1	5124.3	6909.2	5172.1	6465.7	8084
pme2761	161	73	162.016	C5H6O6	[M-H]-	4-Hydroxy-2-oxoglutaric acid	Others	Others	C01127	ko00630,ko01100	1187-99-1	250670	318130	316890	529460	260400	337120	510700	460320	459060	521520	366680	424990	422120	461990	325710
pmf0440	163.08	91.1	162.068	C10H10O2	[M+H]+	4-MethoxycinnaMaldehyde	Phenolic acids	Phenolic acids	C10475	--	1963-36-6	14638	16214	15448	9	9	9	72706	76454	81240	21977	12235	18508	29056	29050	26914
Lmbn002739	163.04	119.05	164.047	C9H8O3	[M-H]-	3-Hydroxycinnamic Acid	Phenolic acids	Phenolic acids	C12621	ko00360,ko01100	14755-02-3	1452400	1295500	1066100	437240	371310	460060	533530	560240	531930	498930	579210	428230	564440	576370	622190
pmb0142	165.1	95.2	164.047	C9H8O3	[M+H]+	Caffeic aldehyde	Phenolic acids	Phenolic acids	C10945	ko00940,ko01110	141632-15-7	3378700	3175600	2925300	2719200	2617900	2647100	4728400	4498200	4659400	3812200	3973400	3891100	4203000	4302700	4306300
pme1439	165.05	119	164.047	C9H8O3	[M+H]+	p-Coumaric acid	Phenolic acids	Phenolic acids	C00811	ko00130,ko00350,ko00940,ko00950,ko00998,ko01100,ko01110	501-98-4	258600	291500	288660	675010	608730	606460	521120	419160	466840	516890	415580	467670	535270	485980	363860
mws0159	163.04	91	164.047	C9H8O3	[M-H]-	Phenylpyruvic acid	Others	Others	C00166	ko00360,ko00400,ko00960,ko01100,ko01110,ko01210,ko01230	156-06-9	42249	74280	47029	29826	32103	38983	48592	58397	49066	40801	38607	48713	50907	58551	28620
pme3083	164.04	120	165.043	C8H7NO3	[M-H]-	2-(Formylamino)benzoic acid	Phenolic acids	Phenolic acids	C05653	ko00380,ko01100	3342-77-6	7572600	7020700	6496600	2879500	2456700	2883600	5306800	5615900	5298700	2944700	2371300	2974900	4116200	3861400	4164800
pme0281	165.02	121.03	166.027	C8H6O4	[M-H]-	Terephthalic acid	Phenolic acids	Phenolic acids	C06337	ko01100	100-21-0	62665	71847	67559	39367	38738	52944	59794	68747	67329	26799	35575	44196	50770	49764	60628
mws0344	165.04	75	166.048	C5H10O6	[M-H]-	D-Xylonic acid	Others	Others	C00502	ko00040,ko01100	526-91-0	27896000	24874000	26336000	47712000	47937000	42380000	29554000	28968000	31105000	41018000	40534000	36617000	34086000	33303000	35534000
pme3381	165.06	106	166.063	C9H10O3	[M-H]-	3-Hydroxyphenylacetic Acid Methyl Ester	Phenolic acids	Phenolic acids	--	--	42058-59-3	9065.8	7727.4	7694.1	29829	26663	31278	4554.6	2172.2	4024	3858.3	36933	5325	8514.9	8122.4	14118
mws1382	165.06	122.04	166.063	C9H10O3	[M-H]-	4'-Hydroxy-3'-methoxyacetophenone (Acetovanillone)	Phenolic acids	Phenolic acids	C11380	--	498-02-2	32763	37479	36179	9	14065	15691	60625	40139	46273	46661	66401	43220	24115	28182	30038
mws0467	165.06	119.05	166.063	C9H10O3	[M-H]-	3-(4-Hydroxyphenyl)-propionic acid	Phenolic acids	Phenolic acids	C01744	--	501-97-3	357420	480010	378250	545520	433810	423100	471150	519240	628000	579110	533460	461910	412020	428920	408800
Lmdp003146	167.11	93.07	166.099	C10H14O2	[M+H]+	Rhododendrol	Phenolic acids	Phenolic acids	--	--	501-96-2	139110	143830	163100	107770	95708	108450	150770	128590	117320	116280	129860	166440	124620	106080	125630
NK10253223	168.06	94.06	167.058	C8H9NO3	[M+H]+	2-Amino-3-methoxybenzoic acid	Phenolic acids	Phenolic acids	C05831	ko00380	3177-80-8	67571	70568	56269	192110	158330	187970	35343	39552	32887	48795	46005	48906	66507	75849	83085
pme1292	167.1	123.04	168.042	C8H8O4	[M-H]-	Homogentisic acid	Phenolic acids	Phenolic acids	C00544	ko00130,ko00350,ko01100	451-13-8	380750	348230	375690	741880	755930	679540	1225900	1044300	1079500	1204900	1175100	1004500	742640	704900	822080
Hmbp001276	169.05	65.03	168.042	C8H8O4	[M+H]+	Gallacetophenone	Phenolic acids	Phenolic acids	--	--	528-21-2	168590	145970	138040	190330	176020	182310	285160	251100	271970	349350	349220	276940	215730	236610	227530
pme2598	167.03	123.04	168.042	C8H8O4	[M-H]-	3,4-Dihydroxybenzeneacetic acid	Phenolic acids	Phenolic acids	C01161	ko00350,ko01100	102-32-9	185950	161760	167830	160810	136000	160730	113740	155590	151750	101950	83582	83407	101070	128220	122840
mws0028	167.03	108.02	168.042	C8H8O4	[M-H]-	Vanillic acid	Phenolic acids	Phenolic acids	C06672	--	121-34-6	700960	668790	564990	528380	562400	815740	551470	559960	573450	536890	530890	546800	512190	467900	545240
NK10252689	168.03	123.01	169.038	C7H7NO4	[M-H]-	2-Methoxy-5-nitrophenol	Phenolic acids	Phenolic acids	C17385	--	636-93-1	12026	8132.5	8151.8	9671.4	9312.6	7984.2	2491.4	3989.9	2816	2086	9	9	6859.5	6044.9	2923.1
pme3186	169	79	169.998	C3H7O6P	[M-H]-	DL-Glyceraldehyde-3-phosphate	Others	Others	C00661	--	591-59-3	9	9	9	14401	17182	17836	14235	23077	21156	50201	65809	79138	17584	18863	19286
mws0024	169.01	125	170.022	C7H6O5	[M-H]-	Gallic acid	Tannins	Tannin	C01424	--	149-91-7	1048500	1004800	1148700	2006000	1873800	1960500	737210	747840	669330	1066600	1170300	1106800	1014300	1175300	1249300
ML10176345	171.03	109.03	172.037	C7H8O5	[M-H]-	3-Dehydroshikimic acid	Others	Others	C02637	ko00400,ko01100,ko01110,ko01230	2922-42-1	65393	73280	79781	207120	174720	173630	12104	14552	11630	19992	25643	21681	54878	56107	51305
Lmbn003524	171.1	99.08	172.11	C9H16O3	[M-H]-	9-Oxononanoic acid	Others	Others	C16322	ko00592,ko01110	2553-17-5	146140	138610	146690	25911	29120	31520	41387	34581	33671	27481	28769	25860	48490	53860	46934
Zmgn004439	171.14	153.14	172.146	C10H20O2	[M-H]-	Decanoic acid	Others	Others	C01571	ko00061,ko01100	334-48-5	3944.7	3666.5	3359.4	1663.9	1469.5	1323.2	2365.5	2592.9	1975.9	1335.6	1043.2	1560.9	2035.2	2225.8	2289.8
pme3009	175.02	99	174.016	C6H6O6	[M+H]+	Trans-Citridic acid	Others	Others	C02341	ko00660,ko01100	4023-65-8	1154100	703360	1191400	615110	509520	495440	613010	707500	672070	613840	525580	550640	1062900	742380	621390
mws0154	173.05	93	174.053	C7H10O5	[M-H]-	Shikimic acid	Others	Others	C00493	ko00400,ko01100,ko01110,ko01230	138-59-0	313960	358140	351890	128930	153190	154200	210510	184530	223730	188760	216490	201990	236800	238280	245760
Lmgn002091	173.05	93.03	174.053	C7H10O5	[M-H]-	2-Methyl-3-oxoadipic acid	Others	Others	C18307	--	-	29283	14161	22529	24991	47415	34442	8107.2	15535	13225	18823	9	9777.3	13763	23938	14548
mws0242	173.08	111	174.089	C8H14O4	[M-H]-	Suberic Acid	Others	Others	C08278	--	505-48-6	39924	60284	50851	59961	88751	57246	37873	43283	42225	40744	43922	33072	61359	44825	44992
Lmgn002555	173.08	59.01	174.089	C8H14O4	[M-H]-	2-Propylglutaric acid	Others	Others	C16658	--	32806-62-5	4695500	5138600	5671600	4490600	5444800	4558900	2034400	2249400	2593400	3204100	3922900	3426800	3728100	3532500	4092600
pme1651	176.1	130.1	175.063	C10H9NO2	[M+H]+	Indole 3-acetic acid (IAA)	Alkaloids	Plumerane	C00954	ko00380,ko01100,ko04075	87-51-4	244100	207230	209260	217270	238370	217770	194720	199710	172880	152090	146110	166300	184440	200450	177970
Zmgn001448	175.06	115.04	176.068	C7H12O5	[M-H]-	2-Propylmalic Acid*	Others	Others	C05994	ko00620	-	3571700	3479500	3191300	4012500	3406900	3933800	3596000	4229800	3569500	3255000	3293800	4001100	3521900	3493600	3372000
pmb3101	175.06	115	176.068	C7H12O5	[M-H]-	2-Isopropylmalic Acid*	Others	Others	C02504	ko00290,ko00620,ko01100,ko01110,ko01210,ko01230	49601-06-1	3334400	3322900	3190600	3663900	3657300	3522100	3524400	4056300	3641700	3140000	3481700	4055200	3154900	3232400	3523900
pmf0367	177.02	88.9	178.027	C9H6O4	[M-H]-	5,7-Dihydroxychromone	Others	Others	C09001	--	31721-94-5	55231	53466	46066	35626	41823	45386	13853	14256	10450	8590.3	7065.5	8458.6	26352	32274	27414
mws1013	177.02	133.2	178.027	C9H6O4	[M-H]-	Esculetin	Lignans and Coumarins	Coumarins	C09263	--	305-01-1	1913400	2458900	1984000	2251200	2087000	1921500	870080	1101400	1019200	843360	1004200	1110300	1442600	1506400	1739600
mws1074	177.02	121	178.027	C9H6O4	[M-H]-	Daphnetin	Lignans and Coumarins	Coumarins	C03093	--	486-35-1	456740	512810	454350	473310	436500	581250	125930	188600	178200	168290	191520	180270	298400	235780	285440
mws1195	179.07	147.1	178.063	C10H10O3	[M+H]+	p-Coumaric acid methyl ester	Phenolic acids	Phenolic acids	--	--	3943-97-3	589260	564850	544920	239240	224080	236900	300890	326380	297790	293070	316460	312140	365100	382730	397980
mws0009	179.07	91	178.063	C10H10O3	[M+H]+	Coniferaldehyde	Phenolic acids	Phenolic acids	C02666	ko00940,ko01100,ko01110	20649-42-7	36200	31820	34221	19561	17728	18574	15341	16876	14679	15891	12456	13760	15874	16266	21261
mws2212	179.03	135.05	180.042	C9H8O4	[M-H]-	Caffeic acid	Phenolic acids	Phenolic acids	C01197	ko00940,ko01100,ko01110	331-39-5	15268000	14037000	14166000	19884000	18230000	16313000	11444000	12430000	13645000	9350700	10089000	13533000	13004000	13651000	13501000
mws0093	179.07	146	180.079	C10H12O3	[M-H]-	Coniferyl alcohol	Phenolic acids	Phenolic acids	C00590	ko00940,ko00998,ko01100,ko01110	458-35-5	35277	31129	37802	12405	6178.1	7678.5	22977	19008	16221	8626.3	10471	16818	14803	21552	15302
Cmyp007180	181.12	107.09	180.115	C11H16O2	[M+H]+	Dihydroactinidiolide	Others	Others	--	--	17092-92-1	10466000	10981000	10453000	19471000	18803000	19349000	11709000	11341000	11410000	15859000	14905000	15447000	12981000	13479000	13380000
Zmyn003394	181.05	166.03	182.058	C9H10O4	[M-H]-	2',6'-Dihydroxy-4'-methoxyacetophenone	Phenolic acids	Phenolic acids	C10680	--	7507-89-3	2789.5	2990.7	3255.4	7299.3	5358.8	5072.5	1263.4	1642.2	1671.3	1912.6	2256.3	2058.5	2198.3	2914.7	3163.8
mws1350	181.05	151	182.058	C9H10O4	[M-H]-	Syringaldehyde; 4-Hydroxy-3,5-Dimethoxybenzaldehyde	Phenolic acids	Phenolic acids	--	--	134-96-3	1563500	1599500	1623800	822690	885870	963340	919150	1122500	1120700	758540	793490	771540	1013200	1097200	962420
Hmtn001288	181.05	135.04	182.058	C9H10O4	[M-H]-	Methyl 2,4-dihydroxyphenylacetate	Phenolic acids	Phenolic acids	--	--	67828-42-6	332090	316740	318370	371270	361130	330070	515670	576030	562720	445490	432150	352840	335250	369570	349790
mws0117	181.05	122	182.058	C9H10O4	[M-H]-	Homovanillic acid; 4-Hydroxy-3-methoxyphenylacetic acid	Phenolic acids	Phenolic acids	C05582	ko00350,ko01100	306-08-1	13852	12411	11922	12893	13616	12233	15139	13847	24150	9343.1	12557	9327.8	13361	12564	9988.6
Lmlp001436	183.07	165.06	182.058	C9H10O4	[M+H]+	Dihydrocaffeic acid	Phenolic acids	Phenolic acids	C10447	ko00350	1078-61-1	25769	20963	28650	159320	194650	172700	267680	256160	252060	355600	281220	351650	208460	187540	202770
HJN037	183.03	124.02	184.037	C8H8O5	[M-H]-	4-O-Methylgallic Acid	Phenolic acids	Phenolic acids	--	--	4319-02-2	47834	47032	54554	20019	12033	15410	23121	21544	16135	8539.3	9458.3	17481	18523	35238	28564
pmb1754	184	125	184.073	C5H15NO4P+	[M]+	O-Phosphocholine	Alkaloids	Alkaloids	C00588	ko00564,ko01100	107-73-3	41743	54677	50537	51521	35623	44049	10087	12121	14429	17262	24807	14642	22598	25742	21520
mws0237	187.1	125	188.105	C9H16O4	[M-H]-	Azelaic acid	Others	Others	C08261	--	123-99-9	1394000	1496700	1488600	504470	508220	490160	964140	1075000	970990	779580	742560	768580	907440	761670	845290
pme2244	190.09	118.07	189.07	C11H11NO2	[M+H]+	3-Indolepropionic acid	Alkaloids	Plumerane	--	--	830-96-6	41513	40696	44905	50862	57226	46344	51217	57475	57634	44337	50035	50474	45415	51131	47967
mws0597	190.05	146	191.058	C10H9NO3	[M-H]-	5-Hydroxyindole-3-acetic acid	Alkaloids	Plumerane	C05635	ko00380,ko01100	54-16-0	39224	32987	48370	48332	46574	55654	9	9	9	11416	19607	20900	22130	27803	41081
Zmyn000453	191.02	111.01	192.027	C6H8O7	[M-H]-	Isocitric Acid*	Others	Others	C00311	ko00020,ko00630,ko01100,ko01110,ko01200,ko01210,ko01230	320-77-4	15481000	15830000	15906000	10179000	16043000	13682000	19437000	17605000	16116000	15810000	17176000	16184000	11531000	15891000	17690000
mws0281	191.02	111.01	192.027	C6H8O7	[M-H]-	Citric Acid*	Others	Others	C00158	ko00020,ko00250,ko00630,ko01100,ko01110,ko01200,ko01210,ko01230	77-92-9	10925000	12425000	12519000	16605000	16607000	17147000	15645000	16037000	16830000	18832000	16834000	19236000	15207000	15662000	15599000
pme2993	193.05	133	192.042	C10H8O4	[M+H]+	Scopoletin (7-Hydroxy-5-methoxycoumarin)	Lignans and Coumarins	Coumarins	C01752	ko00940,ko01110	92-61-5	975230	1075800	885470	1074100	891960	976940	1171000	1087700	1026800	727570	985740	685360	820300	903820	815230
Hmcp002123	193.05	178.02	192.042	C10H8O4	[M+H]+	Isoscopoletin (6-Hydroxy-7-Methoxycoumarin)	Lignans and Coumarins	Coumarins	C18079	--	776-86-3	32101	18574	23854	2797700	2849900	2275900	1768300	1971100	2054500	3765300	3735100	3905500	1962200	2111300	2042300
mws0277	191.06	85	192.063	C7H12O6	[M-H]-	Quinic Acid	Others	Others	C00296	ko00400,ko01100	77-95-2	5697200	5594800	5882800	4528400	5785200	5354000	6521700	7747800	6802800	5818300	7956800	6603700	5108900	5817200	6049400
Lmmp002080	193.13	105.03	192.126	C11H16N2O	[M+H]+	N-(4-Aminobutyl)benzamide	Alkaloids	Phenolamine	--	--	5692-23-9	368770	293490	300810	217940	210530	237700	506140	518080	667950	188980	254190	244440	292110	291930	352530
mws0014	193.05	134.01	194.058	C10H10O4	[M-H]-	Ferulic acid	Phenolic acids	Phenolic acids	C01494	ko00940,ko01100,ko01110	537-98-4	4551800	4556600	4434700	1679500	1400100	1142900	4965600	6117700	5734500	2735200	2374500	2217200	3450100	3370700	3468200
Lmdn003756	193.05	135.05	194.058	C10H10O4	[M-H]-	Methyl caffeate	Phenolic acids	Phenolic acids	C10477	--	3843-74-1	287950	218910	179340	211640	252700	229020	486410	421580	452880	634400	551880	523960	324620	370120	370430
pmf0319	195.07	137	196.074	C10H12O4	[M-H]-	Acetosyringone	Phenolic acids	Phenolic acids	C10664	--	2478-38-8	11054	10656	8878.4	8260.7	6209.1	5604.8	7091.5	6484.8	3840.1	6770.8	2600.8	4382.7	6201.6	4424.6	5180.8
mws0612	195.07	121	196.074	C10H12O4	[M-H]-	3,4-Dimethoxyphenyl acetic acid	Others	Others	--	--	93-40-3	174460	160480	180820	181350	250050	158150	303900	329030	311250	187820	179680	195410	154020	249840	206120
Hmmn004283	195.07	136.05	196.074	C10H12O4	[M-H]-	Dihydroferulic Acid	Phenolic acids	Phenolic acids	--	--	1135-23-5	1093100	864230	945280	1391700	1307100	1350300	1890000	1939700	2016600	1173900	1129500	1205800	1238000	1251100	1117200
pmb2497	197	153	198.053	C9H10O5	[M-H]-	4-Hydroxy-3-methoxymandelate	Phenolic acids	Phenolic acids	C05584	ko00350,ko01100	55-10-7	47417	54928	35725	38719	38151	41789	61790	46187	44270	55519	50708	42927	51740	56088	51119
mws0027	197.05	123	198.053	C9H10O5	[M-H]-	Syringic acid	Phenolic acids	Phenolic acids	C10833	--	530-57-4	2831200	2403300	2066900	1263800	1684500	1722800	2134500	2356300	1914500	1057400	1184100	1326500	1377600	1301000	1461700
pmb0130	203.12	144	202.111	C12H14N2O	[M+H]+	Acetryptine	Alkaloids	Phenolamine	--	--	3551-18-6	430570	427320	485610	1060500	939280	985740	19829	26165	21350	126150	130010	172340	359310	358170	377400
pme0266	201.11	139	202.121	C10H18O4	[M-H]-	Sebacate	Others	Others	C08277	--	111-20-6	23539	22438	20668	7144.7	6178.5	8323.7	13642	18300	14732	8700.1	10251	11388	13024	10935	12197
mws0018	203.22	83	202.216	C10H26N4	[M+H]+	Spermine	Alkaloids	Phenolamine	C00750	ko00330,ko00410,ko00480,ko00770,ko01100	71-44-3	16221000	16584000	17343000	18875000	19228000	18979000	18245000	18183000	20442000	17560000	17947000	18136000	19154000	18120000	16850000
Zmbp002538	205.1	146.06	204.09	C11H12N2O2	[M+H]+	1-Methoxy-indole-3-acetamide	Alkaloids	Alkaloids	--	--	-	3822400	4114400	3877300	4277800	3947700	4105700	4489400	4463900	4449000	4624800	4665600	4451500	2974600	4222600	4295500
Zmtn001464	204.03	160.04	205.038	C10H7NO4	[M-H]-	4,8-Dihydroxyquinoline-2-carboxylic acid	Others	Others	C02470	ko00380	59-00-7	73279	90000	91596	49148	78815	74119	368500	382510	368030	108790	284920	242590	186460	164740	203490
pmb0818	206.1	147.5	205.074	C11H11NO3	[M+H]+	Methoxyindoleacetic acid	Alkaloids	Plumerane	C05660	ko00380	3471-31-6	2602700	2567900	2631300	2590300	2491800	2618100	2844900	2567600	2641900	2758400	3017900	2850000	2332800	2649200	2669900
pmb1587	207.14	165.2	206.131	C13H18O2	[M+H]+	4-Hydroxy-3,5-diisopropylbenzaldehyde	Phenolic acids	Phenolic acids	--	--	10537-86-7	19333	20632	20613	50460	56789	51910	46194	43512	41912	47936	47332	44859	36326	40281	36037
Lmln010063	205.16	189.13	206.167	C14H22O	[M-H]-	2,6-Di-tert-butylphenol	Phenolic acids	Phenolic acids	--	--	128-39-2	125280	123570	123200	119990	148340	121080	127530	126890	131570	131030	122810	122420	111780	112430	115440
mws1014	209.04	149.1	208.037	C10H8O5	[M+H]+	Fraxetin (7,8-Dihydroxy-6-methoxycoumarin)	Lignans and Coumarins	Coumarins	C09265	--	574-84-5	171620	171800	181220	111480	129220	82367	72263	57768	78794	53279	63234	52227	83196	69201	63117
MA10107783	207.03	119.05	208.037	C10H8O5	[M-H]-	3-[(1-Carboxyvinyl)oxy]benzoic acid	Phenolic acids	Phenolic acids	C20772	ko00130,ko01110	16929-37-6	105830	114620	98100	45069	23235	16915	36227	46377	40185	21555	29703	22578	38363	49043	32383
pmb2620	207.07	133.1	208.074	C11H12O4	[M-H]-	3,4-Dimethoxycinnamic acid	Phenolic acids	Phenolic acids	--	--	14737-89-4	2134.8	3613.8	4235.8	2677.3	1732.2	2278.1	15076	13123	14019	8010.8	12063	8762.8	5570.9	6726.2	6245.6
mws1212	209.08	177.3	208.074	C11H12O4	[M+H]+	Methyl ferulate	Phenolic acids	Phenolic acids	--	--	2309-07-1	193190	234280	234140	128890	141230	137200	486010	501320	498960	223070	210210	247590	242440	274530	264930
pme3443	207.07	192	208.074	C11H12O4	[M-H]-	Sinapinaldehyde	Phenolic acids	Phenolic acids	C05610	ko00940,ko01100,ko01110	4206-58-0	195950	288660	249020	41599	29394	30945	210570	246830	398590	168240	99451	195830	136650	175800	199710
Hmcp003783	211.09	193.07	210.079	C13H10N2O	[M+H]+	1-Acetyl-β-carboline	Alkaloids	Alkaloids	--	--	-	309960	288360	278760	230950	228490	235520	416930	391710	390630	279430	274750	304390	307730	302560	303440
mws0853	209.08	179	210.089	C11H14O4	[M-H]-	Sinapyl alcohol	Phenolic acids	Phenolic acids	C02325	ko00940,ko01100,ko01110	537-33-7	265550	212580	262720	234600	218340	231680	246530	230480	273260	234320	282940	250170	212920	231580	231020
pme3437	213.08	154.1	212.068	C10H12O5	[M+H]+	Eudesmic acid (3,4,5-trimethoxybenzoic acid)	Phenolic acids	Phenolic acids	--	--	118-41-2	130480	138600	117520	7752.3	9528.9	5921.6	89787	85441	68771	16851	13732	12065	43374	58310	47792
mws4085	223.06	193	224.068	C11H12O5	[M-H]-	Sinapic acid	Phenolic acids	Phenolic acids	C00482	ko00940,ko01100,ko01110	530-59-6	499760	440030	463290	391450	441720	408680	599600	715290	633690	254880	487210	408410	369530	418010	474660
Hmgp004837	225.11	139.04	224.104	C12H16O4	[M+H]+	Dhelwangin	Others	Others	--	--	23800-56-8	2325.8	2847.8	3224.3	17645	18313	19250	7846.8	5370.5	5502.5	10312	11391	10743	8350.3	9184.7	7793.4
mws0474	229.14	211	230.152	C12H22O4	[M-H]-	Dodecanedioic aicd	Others	Others	C02678	--	693-23-2	38061	36826	36069	16308	15974	17485	26393	26296	25891	14765	15628	14646	20940	22318	24164
pmb0490	235.14	147.04	234.137	C13H18N2O2	[M+H]+	p-Coumaroylputrescine	Alkaloids	Phenolamine	C18326	ko00330,ko01100	34136-53-3	256480	267660	241860	356540	385980	392400	100440	132340	106310	130760	188100	187310	224990	193860	200190
Lmhn003240	237.04	121.03	238.048	C11H10O6	[M-H]-	Benzoylmalic acid	Phenolic acids	Phenolic acids	--	--	22138-51-8	51165	72964	62003	14116	13134	16438	28652	21413	36124	48211	26789	19718	29423	34224	28832
pmn001320	237.08	163.04	238.084	C12H14O5	[M-H]-	1-O-p-Cumaroylglycerol	Phenolic acids	Phenolic acids	--	--	106055-11-2	11231	14886	12682	18167	7879.8	10433	20461	23220	22920	10757	9061.2	10988	10529	17461	19726
pme0428	237.08	103	238.084	C12H14O5	[M-H]-	3,4,5-Trimethoxycinnamic acid	Phenolic acids	Phenolic acids	--	--	90-50-6	21067	22091	21521	12801	15031	15428	7857.5	7680.2	8155.6	3309.6	6155.4	4310.8	9251.2	11356	11758
Lmzn001925	239.09	195.1	240.1	C12H16O5	[M-H]-	3,4'-Dihydroxy-3'-methoxybenzenepentanoic acid	Phenolic acids	Phenolic acids	--	--	-	7834.5	6632.5	9097.6	22615	34307	21291	8376.3	10288	7381.3	5752.6	13522	8092.4	9924.9	7340.3	10392
mws1383	243.09	145	242.08	C12H10N4O2	[M+H]+	Lumichrome	Alkaloids	Alkaloids	C01727	ko00740	1086-80-2	153640	151950	144710	56116	64581	55578	219780	236020	244120	136980	128280	125950	226120	223670	219250
pmb0323	251.14	163.04	250.132	C13H18N2O3	[M+H]+	N-Caffeoylputrescine	Alkaloids	Phenolamine	C03002	--	29554-26-5	59563	54329	54491	72384	73818	71791	34762	35202	35387	30272	39453	46664	48633	50776	44300
pma1840	250.14	147	250.144	C14H20NO3+	[M]+	4-Coumaroylcholine	Alkaloids	Alkaloids	--	--	-	217350	222100	169340	101230	97015	96104	383560	334770	349240	174100	127100	102690	175330	181410	218370
Lmtn004049	263.13	204.12	264.136	C15H20O4	[M-H]-	Abscisic acid	Others	Others	C06082	ko00906,ko01100,ko01110,ko04075	21293-29-8	214140	199150	219990	688060	726790	697870	410140	368970	384050	418820	433770	429140	407690	420290	409270
Lmlp003161	265.15	177.06	264.147	C14H20N2O3	[M+H]+	N-Feruloylputrescine	Alkaloids	Phenolamine	C10497	ko00330,ko01100	501-13-3	8470.3	13481	13353	26117	33527	40623	5953	3840.8	11603	40832	51052	57908	24881	12894	25352
pmf0562	265.12	245	266.131	C18H18O2	[M-H]-	Magnolol	Phenolic acids	Phenolic acids	C10651	--	528-43-8	1236.2	1615.2	1409.1	1744.2	1467.6	1351	3228.2	2808.8	3319.6	2533.3	2675.1	2372.5	1833.5	2595.7	2219.8
pma2172	268.13	121	267.126	C17H17NO2	[M+H]+	Cinnamoyltyramine	Alkaloids	Alkaloids	--	--	20384-14-9	117800	140720	105250	17248	17392	9037.3	16758	14964	20845	9	8838.1	9	42492	42257	38282
pmp000086	269.1	177.05	268.095	C13H16O6	[M+H]+	1-Feruloyl-sn-glycerol	Phenolic acids	Phenolic acids	--	--	-	29626	20967	28315	45542	41709	51966	41898	27172	28303	22288	28866	26811	35531	32731	31234
pmp000571	271.06	153.01	270.053	C15H10O5	[M+H]+	Apigenin	Flavonoids	Flavonoid	C01477	ko00941,ko00943,ko00944,ko01100,ko01110	520-36-5	2793000	2667100	2481300	1410300	1595400	1590200	1194100	1171700	1170300	885540	922160	1038300	1621500	1603200	1615600
pme0376	271.06	151	272.068	C15H12O5	[M-H]-	Naringenin (5,7,4'-Trihydroxyflavanone)	Flavonoids	Dihydroflavone	C00509	ko00941,ko00943,ko01100,ko01110	480-41-1	4048500	4138100	4049300	2447200	2431300	2698700	2342500	2387800	2285000	2413500	2306700	2559300	2617300	2609800	2577400
pme3472	271.09	107.6	272.09	C12H16O7	[M-H]-	Arbutin	Phenolic acids	Phenolic acids	C06186	ko00010	497-76-7	412040	416030	416500	191600	222260	226990	327640	390320	413330	276030	300340	315660	292540	285090	320660
pmb0508	277.17	147.04	276.159	C14H20N4O2	[M+H]+	p-Coumaroylagmatine	Alkaloids	Phenolamine	C04498	ko00330,ko01100	7295-86-5	39718	41873	34070	52290	61789	45881	29675	26749	28664	52986	58122	36809	36726	39671	36662
Lmxp011770	279.16	149.02	278.152	C16H22O4	[M+H]+	Diisobutyl phthalate*	Phenolic acids	Phenolic acids	C15205	--	84-69-5	7691400	6870600	6436100	6326000	6268400	6695900	23133000	16673000	20392000	9869300	10560000	10321000	11447000	11000000	10706000
Lmlp012720	279.16	149.02	278.152	C16H22O4	[M+H]+	Dibutyl phthalate*	Phenolic acids	Phenolic acids	C14214	--	84-74-2	8187600	7346700	6949800	6649600	6783600	7325900	23879000	17382000	21140000	10684000	11192000	10599000	11979000	11397000	11495000
pmp001252	284.13	147.04	283.121	C17H17NO3	[M+H]+	p-Coumaroyltyramine	Alkaloids	Phenolamine	--	--	36417-86-4	2541900	2627700	2307100	349320	355340	352340	45164	38852	29705	145600	165510	185630	678310	724960	684780
Lmhn002051	283.05	167.04	284.053	C12H12O8	[M-H]-	Vnilloylmalic acid	Phenolic acids	Phenolic acids	--	--	-	15838	20001	18828	49974	39768	46050	26033	23563	27434	38274	40598	40087	26551	30119	25983
mws1505	283.1	135	284.105	C17H16O4	[M-H]-	Phenethyl caffeate	Phenolic acids	Phenolic acids	C10484	--	104594-70-9	3368.1	3959.1	3577.3	12906	17636	16464	130480	66234	183460	78490	118780	85958	54064	59363	60371
Lmmp004504	287.06	153.02	286.047	C15H10O6	[M+H]+	2'-Hydroxygenistein	Flavonoids	Isoflavones	C12134	ko00943	1156-78-1	551250	515860	535060	323090	321130	344310	153740	165940	124230	63445	62703	83303	295040	301190	307970
Hmbp002730	287.06	153.01	286.047	C15H10O6	[M+H]+	Isoscutellarein	Flavonoids	Flavonoid	C10097	--	41440-05-5	573250	498680	522220	322070	319760	349580	157210	154410	153080	64711	70676	79004	285770	312830	295200
mws0062	287.06	241	286.048	C15H10O6	[M+H]+	Isoluteolin (Orobol)(5,7,3',4'-tetrahydroxyisoflavone)	Flavonoids	Isoflavones	C10510	--	480-23-9	370560	367860	354260	169210	170680	170740	368620	355230	396490	354180	358450	343250	297320	347990	317880
Lmsp004632	287.06	269.04	286.048	C15H10O6	[M+H]+	Scutellarein (5,6,7,4'-Tetrahydroxyflavone)	Flavonoids	Flavonoid	C10184	--	529-53-3	110210	103900	97238	9	9	9	1827900	1923300	1741700	270170	234140	276380	657950	683240	605970
mws1068	285.04	151	286.048	C15H10O6	[M-H]-	Kaempferol (3,5,7,4'-Tetrahydroxyflavone)	Flavonoids	Flavonols	C05903	ko00941,ko00944,ko01100,ko01110	520-18-3	2636400	2653900	2277100	1195400	1165500	1215400	571800	765440	554500	462200	487520	505790	1153800	1284700	1171500
pme0088	285.04	151	286.048	C15H10O6	[M-H]-	Luteolin (5,7,3',4'-Tetrahydroxyflavone)	Flavonoids	Flavonoid	C01514	ko00941,ko00944,ko01100,ko01110	491-70-3	5480900	5493700	5140400	3253000	3481600	3555900	1487800	1616300	1520800	647730	752000	718710	2898400	3114300	3315700
mws1094	287.06	259	288.063	C15H12O6	[M-H]-	Aromadendrin (Dihydrokaempferol)	Flavonoids	Dihydroflavonol	C00974	ko00941,ko01100,ko01110	480-20-6	541420	546570	550090	290950	277850	302080	361540	404110	429870	386310	352300	395360	327260	346480	363520
mws0064	287.06	135	288.063	C15H12O6	[M-H]-	Eriodictyol (5,7,3',4'-Tetrahydroxyflavanone)	Flavonoids	Dihydroflavone	C05631	ko00941,ko01100,ko01110	552-58-9	12814000	12016000	10548000	8317700	8448400	9447500	4423300	4480300	3961700	1821800	2259900	2190500	6831000	6648600	6284600
pmb2657	289.1	97.1	290.123	C10H18N4O6	[M-H]-	Argininosuccinic acid	Others	Others	C03406	ko00220,ko00250,ko01100,ko01110,ko01230	2387-71-5	3555.2	5074.9	3796.7	6740.9	7644.5	8036.8	7095.9	8008.7	7323.8	14978	9785	12096	6922.8	7029.5	7889.1
mws2120	291.01	247	292.022	C13H8O8	[M-H]-	Brevifolin carboxylic acid	Phenolic acids	Phenolic acids	--	--	18490-95-4	99987	61979	84565	32309	35958	33982	18668	10741	11394	9	9	9	32999	42408	41603
Lmln001195	297.1	135.07	298.105	C14H18O7	[M-H]-	Picein (4-Acetylphenyl-glucoside)	Phenolic acids	Phenolic acids	C10720	--	530-14-3	8290.3	8931.7	15940	11924	12340	12849	6221.7	8243.7	7654.1	9209.3	9539.9	10677	8963.4	12410	17277
Lmhn001386	299.04	167.03	300.048	C12H12O9	[M-H]-	Vnilloyltartaric acid	Phenolic acids	Phenolic acids	--	--	-	38928	58860	48115	28232	24926	19868	54502	46071	79825	78796	66784	69151	65264	67438	39761
Zmhp003514	301.07	286.05	300.063	C16H12O6	[M+H]+	6,7,8-Tetrahydroxy-5-methoxyflavone*	Flavonoids	Flavonoid	--	--	-	4820600	4857200	4744200	10223000	11747000	10366000	9178300	8661900	8182500	5306700	4483300	5221000	7758800	7575300	7577600
pmp000001	301.07	286.05	300.063	C16H12O6	[M+H]+	Hispidulin (5,7,4'-Trihydroxy-6-methoxyflavone)*	Flavonoids	Flavonoid	C10058	--	1447-88-7	4830600	4604100	4339100	10217000	11777000	9970900	9444600	8849400	8055300	5335400	4533300	5314300	7651200	7442800	7732900
Zmhn001358	299.08	137.02	300.084	C13H16O8	[M-H]-	4-O-Glucosyl-4-hydroxybenzoic acid	Phenolic acids	Phenolic acids	--	--	-	694820	695210	708760	161220	162420	138000	356440	377940	419860	306820	294080	295540	315020	364810	345000
Zmhn001926	299.08	137.02	300.084	C13H16O8	[M-H]-	1-O-Salicyl-D-glucose	Phenolic acids	Phenolic acids	--	--	60517-74-0	657310	695870	727550	171240	122970	157690	465250	414170	422400	370720	304620	259530	339560	354540	349180
pmb3142	299.1	137.1	300.085	C13H16O8	[M-H]-	Salicylic acid-2-O-glucoside	Phenolic acids	Phenolic acids	--	--	10366-91-3	4735500	5870800	5808900	6845300	5065800	5812200	7995300	9648400	8490800	10273000	6894600	9536400	7435500	7795100	5291000
pmp001176	302.14	103.1	301.131	C17H19NO4	[M+H]+	Dihydrocaffeoyltyramine	Alkaloids	Phenolamine	--	--	-	14886	15164	21572	19155	21013	20355	19787	25258	24358	20042	12981	18071	20070	19964	15722
mws0920	301.04	151	302.043	C15H10O7	[M-H]-	Tricetin (5,7,3',4',5'-Pentahydroxyflavone)	Flavonoids	Flavonoid	C10192	ko00941	520-31-0	143220	155320	174890	20380	27795	24457	56557	50218	28402	22236	25230	25676	77277	96554	72684
pme3514	301.04	151	302.043	C15H10O7	[M-H]-	Quercetin	Flavonoids	Flavonols	C00389	ko00941,ko00944,ko01100,ko01110	117-39-5	25920000	25987000	26282000	6544900	6139200	6352500	6618100	8223700	7219600	3460100	3156700	3772500	12324000	11998000	13551000
mws0463	301.07	164	302.079	C16H14O6	[M-H]-	Hesperetin	Flavonoids	Dihydroflavone	C01709	ko00941	520-33-2	148820	154240	153580	41172	39710	39259	70400	72872	72097	60502	74537	79358	78407	75217	80355
Zmhn000892	301.09	139.05	302.1	C13H18O8	[M-H]-	4-O-Glucosyl-3,4-dihydroxybenzyl alcohol	Phenolic acids	Phenolic acids	--	--	-	107650	118580	138910	110300	115550	84228	195910	181350	232640	184860	196940	191610	162190	152860	139870
mws0044	303.05	125.02	304.058	C15H12O7	[M-H]-	Dihydroquercetin(Taxifolin)	Flavonoids	Dihydroflavonol	C01617	ko00941,ko01100,ko01110	480-18-2	381490	361480	398300	119230	119120	128720	125030	125010	113800	73446	66898	89494	156290	193210	165710
Lmhn001477	311.04	179.04	312.048	C13H12O9	[M-H]-	2-Caffeoyl-L-tartaric acid (Caftaric acid)	Phenolic acids	Phenolic acids	--	--	67879-58-7	28284	28578	20820	26342	38336	23981	49063	45286	53020	46923	44037	36099	40053	43561	40392
Lmtn003441	311.11	149.06	312.121	C15H20O7	[M-H]-	2-Acetyl-3-hydroxyphenyl-1-O-glucoside	Phenolic acids	Phenolic acids	--	--	-	37986	25471	26304	9	6060.2	6520.1	7517.2	6417.6	6064.7	9556.4	5884.3	6985.8	15814	10666	16000
mws1433	314.14	177.05	313.131	C18H19NO4	[M+H]+	N-Feruloyltyramine	Alkaloids	Phenolamine	C02717	--	66648-43-9	3620000	3641700	3234100	1853100	1741700	1985600	245220	299230	226380	477410	475290	643010	1418400	1366500	1374200
mws1174	313.07	253	314.079	C17H14O6	[M-H]-	3-O-Acetylpinobanksin	Flavonoids	Dihydroflavonol	C16418	ko00941	52117-69-8	80633	81969	65159	1008400	4323000	574260	2640500	1960900	2840400	420600	578300	429400	1150600	1180900	1196100
pmn001571	313.11	298.08	314.115	C18H18O5	[M-H]-	Agrimonolide	Phenolic acids	Phenolic acids	--	--	21499-24-1	12820	8670.9	6898.5	20841	40558	18062	20337	18399	18566	7180.8	6851.3	4674.3	14307	13478	14777
Lmdp003808	317.07	302.04	316.058	C16H12O7	[M+H]+	Azaleatin (5-O-Methylquercetin)	Flavonoids	Flavonols	C10022	--	529-51-1	215730	113910	190710	7851400	7197700	9235000	2547300	1962200	3165900	2828600	2033700	2013900	2733000	2801100	3722400
mws2627	317.07	285.04	316.058	C16H12O7	[M+H]+	Tamarixetin (3,3',5,7-Tetrahydroxy-4'-Methoxyflavone)	Flavonoids	Flavonoid	C10188	--	603-61-2	86133	103340	95123	191460	188790	204210	157590	164560	164960	74042	70009	81295	132990	140140	144400
mws0066	315.05	151	316.058	C16H12O7	[M-H]-	Isorhamnetin	Flavonoids	Flavonols	C10084	--	480-19-3	591580	588250	568450	1135300	1137400	1170000	1035300	1060800	1164800	462040	459630	514530	775590	862360	889780
Lmmn004912	315.05	271.02	316.058	C16H12O7	[M-H]-	3-O-Methylquercetin	Flavonoids	Flavonols	C04443	ko00944	1486-70-0	47603	48433	47883	18444	8060.9	15041	9	9	9	9	9	9	20405	22946	12844
pmn001367	315.07	153.02	316.079	C13H16O9	[M-H]-	Protocatechuic acid-4-O-glucoside	Phenolic acids	Phenolic acids	--	--	-	995890	1246100	1131000	640910	642090	619490	1024200	1014800	1273700	1214000	1044000	1197300	965160	886370	889040
Lmfp001509	317.09	153.02	316.079	C13H16O9	[M+H]+	1-O-Galloyl-rhamnose	Tannins	Tannin	--	--	-	7675.8	10465	11853	10242	7833.2	8945.7	5648.4	7287	6836.8	3612.7	4543.1	4408.8	10275	5933.5	7659.2
pmb0751	321.1	147.3	320.09	C16H16O7	[M+H]+	Trans-5-O-(p-Coumaroyl)shikimate	Phenolic acids	Phenolic acids	C02947	ko00940,ko00941,ko00945,ko01100,ko01110	-	127550	133040	143060	107370	115510	126720	273690	248020	278110	142210	159350	163360	136550	148970	156600
mws0983	326.31	62.06	325.298	C20H39NO2	[M+H]+	N-Oleoylethanolamine	Alkaloids	Alkaloids	C20792	--	111-58-0	580660	504330	477880	456050	420210	896590	439780	463520	477660	282800	699740	652910	577560	552140	559510
Zmhn002301	325.09	163.04	326.1	C15H18O8	[M-H]-	p-Coumaric acid-4-O-glucoside	Phenolic acids	Phenolic acids	C06739	--	117405-48-8	5575300	6550900	5060500	8553900	8416700	10127000	12010000	13346000	11297000	12660000	12760000	10810000	10506000	8949900	8971900
Lmjp007790	329.1	314.08	328.095	C18H16O6	[M+H]+	5-Hydroxy-3,7,4'-trimethoxyflavone	Flavonoids	Flavonoid	--	--	-	7852.6	6975.8	7039.5	3950.4	3617.8	3377.5	5146.8	3454.4	3361.6	1667.1	1030	1098.2	4969.9	5040.2	4147.5
Lmtn002233	327.11	165.06	328.116	C15H20O8	[M-H]-	Androsin	Others	Others	--	--	531-28-2	4295700	4071300	3753000	2789400	3426900	3046000	4318600	4605200	4493000	4627300	4956400	5030200	4004000	3812900	3865100
Hmsn002272	327.11	165.05	328.116	C15H20O8	[M-H]-	Demethyl coniferin	Phenolic acids	Phenolic acids	--	--	-	7031900	6793300	6977500	1636400	1891100	1628700	20006000	19281000	20064000	13457000	14329000	13857000	10253000	10718000	11649000
Hmjp005089	330.13	177.05	329.124	C18H19NO5	[M+H]+	(2Z)-N-[2-(3,4-Dihydroxyphenyl)-2-hydroxyethyl]-3-(4-methoxyphenyl)-2-propenamide	Alkaloids	Alkaloids	--	--	-	1718000	1445100	1293600	2590700	2689500	2511700	154350	146270	177160	1294300	1445200	1634500	1223800	1330900	1193800
Lmcp005645	331.08	287.05	330.074	C17H14O7	[M+H]+	Quercetin-3,4'-Dimethyl Ether	Flavonoids	Flavonols	--	--	33429-83-3	13392	14502	10301	3213.5	1655.8	3852.6	5403.9	4330.9	5994.9	1642.8	9	9	5705.4	4989.2	4494.2
Lmtn002565	329.11	167.03	330.095	C14H18O9	[M-H]-	1-O-Vanilloyl-D-Glucose	Phenolic acids	Phenolic acids	C20470	--	-	63722	40331	47569	77116	57206	50300	51548	77540	78164	75613	67777	74145	57170	55246	60166
Lmmp003087	331.1	169.05	330.095	C14H18O9	[M+H]+	Mudanoside A	Phenolic acids	Phenolic acids	--	--	-	163680	196030	145110	276640	298400	299180	198210	171800	206660	239750	243460	266490	190330	249770	232840
pmn001517	329.12	167	330.131	C15H22O8	[M-H]-	3,4,5-Trimethoxyphenyl-1-O-Glucoside	Phenolic acids	Phenolic acids	--	--	-	1398700	1374900	1236700	1420300	1443100	1406200	2700300	2790800	2200500	3071800	3302300	2619600	1925200	1967800	1867000
Lmfn000604	331.07	169.01	332.074	C13H16O10	[M-H]-	6-O-Galloyl-D-glucose	Tannins	Tannin	--	--	13186-19-1	243090	236730	206750	208330	132420	133600	126190	117300	146130	108530	106450	109410	125990	132210	141230
pmn001518	331.07	169.01	332.074	C13H16O10	[M-H]-	1-O-Galloyl-D-glucose	Tannins	Tannin	C01158	--	58511-73-2	120620	120290	117310	78657	90016	83106	99773	117040	111770	136320	169280	156810	100150	94962	108500
Hmln000873	331.07	169.01	332.075	C13H16O10	[M-H]-	2-O-Galloyl-D-glucose	Tannins	Tannin	--	--	-	240130	242830	217020	194810	140330	152980	126810	117430	122360	102070	112900	104390	126720	145190	144650
Hmln002806	335.08	179.03	336.085	C16H16O8	[M-H]-	5-O-Caffeoylshikimic acid	Phenolic acids	Phenolic acids	C10434	ko00940,ko00941,ko00945,ko01100,ko01110	180981-12-8	2196400	2695100	2499200	1452000	1423100	1515900	2829700	2506300	2609600	1347800	1567600	1649500	2001200	2097600	2239200
pmb0776	337.15	177.4	336.147	C20H20N2O3	[M+H]+	N-Feruloyltryptamine	Alkaloids	Phenolamine	--	--	53905-13-8	653.08	600.26	9	46936	49123	60496	9	9	9	4853.1	2812.1	5543.2	12002	9465.5	12196
pmb0498	337.19	207.07	336.18	C16H24N4O4	[M+H]+	Sinapoylagmatine	Alkaloids	Phenolamine	--	--	-	19384	15761	11440	24330	28478	28227	10303	9	12554	27120	33764	28021	19246	19806	24464
pmb3068	337.09	173.1	338.1	C16H18O8	[M-H]-	1-O-p-Coumaroylquinic acid	Phenolic acids	Phenolic acids	--	--	-	24476	22578	24795	18539	6422.7	22994	24911	31108	23454	12166	11223	18111	27999	18574	29055
pmb3074	337.09	191.05	338.1	C16H18O8	[M-H]-	5-O-p-Coumaroylquinic acid	Phenolic acids	Phenolic acids	C12208	ko00940,ko00941,ko00945,ko01110	1899-30-5	6966800	7370100	8305300	6717500	6366900	5832200	16819000	17490000	17264000	20338000	19264000	18398000	14496000	12395000	12145000
pma6460	337.09	163.04	338.1	C16H18O8	[M-H]-	4-O-p-Coumaroylquinic acid	Phenolic acids	Phenolic acids	C10441	--	32451-86-8	27259	41791	36140	41075	20697	46748	72886	69203	73333	101270	76594	102210	60642	58235	56858
Lmbn001162	339.07	177.02	340.079	C15H16O9	[M-H]-	Esculetin-7-O-glucoside	Lignans and Coumarins	Coumarins	--	--	-	70347	96287	76737	53701	61429	58564	76926	89182	75005	60656	66334	71676	61500	68051	63970
pmn001420	341.09	179.04	342.095	C15H18O9	[M-H]-	1-O-[(E)-Caffeoyl]-D-glucose	Phenolic acids	Phenolic acids	--	--	-	6523900	7131500	5651900	7535900	6647800	7111300	10101000	11390000	11955000	8835000	7763400	8736600	8117300	7523800	6690800
mws0906	341.12	179	342.131	C16H22O8	[M-H]-	Coniferin	Phenolic acids	Phenolic acids	C00761	ko00940	531-29-3	741170	703770	708430	483170	471680	517300	1501300	1529400	1464200	1158200	1366500	1121900	830090	815380	965620
Zmln000899	343.11	181.05	344.111	C15H20O9	[M-H]-	Syringaldehyde-4-O-glucoside	Phenolic acids	Phenolic acids	--	--	-	2832900	3343400	2674900	1582200	1572600	1700000	5498400	6882400	5431300	5887100	5211100	5929500	4051200	3821500	3650100
Lmmn000774	343.1	181.05	344.111	C15H20O9	[M-H]-	Dihydrocaffeoylglucose	Phenolic acids	Phenolic acids	--	--	-	320980	309480	272580	139240	143090	114620	326270	309040	341780	285690	297600	293460	271430	287550	262580
pmb0770	353.15	177.1	352.142	C20H20N2O4	[M+H]+	N-Feruloylserotonin	Alkaloids	Phenolamine	--	--	68573-23-9	7221.3	16042	12232	9	9	9	18115	15774	19218	9	9	6211.6	10760	6209.8	7442.4
pme1816	353.09	191	354.095	C16H18O9	[M-H]-	Neochlorogenic acid (5-O-Caffeoylquinic acid)	Phenolic acids	Phenolic acids	C17147	--	906-33-2	7258900	7891600	6625500	6992000	7111400	6979500	6693600	6622400	6575300	4525400	5186800	5552700	5204100	5916000	6278900
mws0178	353.09	191.01	354.095	C16H18O9	[M-H]-	Chlorogenic acid (3-O-Caffeoylquinic acid)	Phenolic acids	Phenolic acids	C00852	ko00940,ko00941,ko00945,ko01110	327-97-9	1068900	1019500	1126200	752480	881830	919550	1440200	1394000	1555100	1274200	1694300	1537000	1334500	1069900	1275700
mws2108	353.09	191.05	354.095	C16H18O9	[M-H]-	Cryptochlorogenic acid (4-O-Caffeoylquinic acid)	Phenolic acids	Phenolic acids	--	--	905-99-7	993050	1168200	960520	851760	691800	799820	1539400	1306600	1532200	1252500	1603100	1381000	1051200	1121000	1206200
Lmhn001580	355.07	223.06	356.074	C15H16O10	[M-H]-	Sinapoyltartaric acid	Phenolic acids	Phenolic acids	--	--	-	9	9	9	9480.8	8053.3	6475.5	13045	9644.6	8994.7	9433.4	8772	8335.9	5863	7573.5	8255.7
Zmhn002422	355.1	193.05	356.11	C16H20O9	[M-H]-	1-O-Feruloyl-D-Glucose	Phenolic acids	Phenolic acids	C17759	--	-	711150	861570	842600	566450	669150	619380	1148400	1076500	1167600	1105600	1191200	1150200	942270	988830	1071800
mws0097	357.13	151	358.142	C20H22O6	[M-H]-	Pinoresinol	Lignans and Coumarins	Lignans	C05366	ko00998,ko01100,ko01110	487-36-5	79345	80144	65325	64569	72661	69523	139270	148200	140690	83661	89271	80157	90348	88827	85260
pme0085	359.08	196.7	360.084	C18H16O8	[M-H]-	Rosmarinic acid	Phenolic acids	Phenolic acids	C01850	ko00350,ko01100	537-15-5	26629	38694	36600	25547	21633	21299	44270	47457	27490	45657	73387	62269	33620	34819	20842
Lmxn007955	359.08	329.03	360.085	C18H16O8	[M-H]-	Sudachitin	Flavonoids	Flavonoid	--	--	4281-28-1	4726.6	10549	9452	6631.3	21214	5733.9	65815	12032	4389.2	3911.4	2986.8	1719.8	13178	10861	12680
Lmfn004235	359.08	161.02	360.085	C18H16O8	[M-H]-	Myricetin-3,7,3'-trimethyl ether	Flavonoids	Flavonols	--	--	-	24411	30121	33934	14621	26828	21596	33861	19366	32760	15461	17460	19857	24080	17760	21658
pmb3107	359.1	182.1	360.106	C15H20O10	[M-H]-	Glucosyringic Acid	Phenolic acids	Phenolic acids	--	--	-	1296600	1625000	1457600	578870	636920	666480	1406600	1378000	1537600	1196100	1066100	981710	1072800	1182300	1075100
pmp000673	361.16	163.07	360.157	C20H24O6	[M+H]+	Lariciresinol	Lignans and Coumarins	Lignans	C10646	ko00998,ko01100,ko01110	27003-73-2	19665	18177	16996	31756	28861	31624	24401	26046	26509	37777	33282	34424	23721	31125	29677
Lmmn003748	359.15	180.08	360.157	C20H24O6	[M-H]-	Isolariciresinol	Lignans and Coumarins	Lignans	--	--	548-29-8	18188	16963	12812	9	9	9	5328.2	7832.6	8521.2	9	9	9	6087.5	8079.5	5542.2
Lmgp003270	369.16	177.06	368.074	C16H16O10	[M+H]+	Scopoletin-7-O-glucuronide	Lignans and Coumarins	Coumarins	--	--	132752-65-9	415430	486260	474390	1132000	1253400	990300	1627000	1592100	1894200	2421000	2327300	3123300	1445700	1483600	1398800
pmb0752	369.12	177.1	368.111	C17H20O9	[M+H]+	3-O-Feruloylquinic acid	Phenolic acids	Phenolic acids	C02572	--	1899-29-2	47971	40321	34982	24323	30415	20961	47793	65065	71972	39858	53147	49339	43907	61373	36680
mws0179	367.1	190.9	368.111	C17H20O9	[M-H]-	Chlorogenic acid methyl ester	Phenolic acids	Phenolic acids	--	--	29708-87-0	705790	814530	744600	1546500	1696800	1455300	2517900	3112600	2937200	4036800	3659300	4359700	1919400	2070700	2231200
pmn001695	371.1	249.06	372.106	C16H20O10	[M-H]-	Trihydroxycinnamoylquinic acid	Phenolic acids	Phenolic acids	--	--	-	331830	349910	352260	154230	155850	147120	82710	89388	69643	78080	62159	81346	137590	154220	149220
mws0011	371.13	209	372.142	C17H24O9	[M-H]-	Syringin	Phenolic acids	Phenolic acids	C01533	ko00940	118-34-3	15693	23115	22706	13077	10863	19716	46818	45250	59043	35521	42002	28652	23246	35167	31186
pmb0108	375.2	137.1	374.1	C19H18O8	[M+H]+	Feruloyl syringic acid	Phenolic acids	Phenolic acids	--	--	-	47964	34336	40435	36329	36606	35779	17772	21595	17877	33712	16323	34788	29594	29916	33350
pmn001400	375.11	243.1	376.116	C19H20O8	[M-H]-	2,3,5,4'-Tetrahydroxystilbene-2-O-D-xyloside	Others	Stilbene	--	--	-	17877	16508	19912	9	8361.4	17756	29081	26936	29745	19287	6674.1	18459	13745	10954	19870
Lmbp003208	385.12	223.06	384.106	C17H20O10	[M+H]+	Fraxidin-8-O-glucoside	Lignans and Coumarins	Coumarins	--	--	-	130580	115380	118030	175030	209230	188740	110850	140160	145640	190750	150030	154940	145420	123720	114590
Hmbn005951	383.12	163.04	384.121	C21H20O7	[M-H]-	1,3-O-Di-p-Coumaroylglycerol	Phenolic acids	Phenolic acids	--	--	-	7839.6	7689.6	7658.2	15510	11305	10942	9275	10787	11424	14481	16819	12056	11750	14801	11728
Zmhn002227	385.11	223.06	386.121	C17H22O10	[M-H]-	4-O-Glucosyl-sinapate	Phenolic acids	Phenolic acids	C02919	--	-	723640	842370	803410	1057600	1106700	1138500	1154600	1267900	1253700	1202900	1436000	1339200	1036600	903730	919130
HJN003	385.11	223.06	386.122	C17H22O10	[M-H]-	1-O-Sinapoyl-D-glucose	Phenolic acids	Phenolic acids	C01175	ko00940	-	611200	677000	614420	1054200	1173100	972430	1208800	942430	1298800	1292400	1160100	1208000	895750	939870	899090
pmb0489	397.2	147.04	396.19	C19H28N2O7	[M+H]+	N-Glucosyl-p-coumaroylputrescine	Alkaloids	Phenolamine	--	--	-	14199	68291	26367	20982	23719	62520	22392	13988	21329	13393	20770	43337	16943	12704	19113
pma0110	399	207.2	398.121	C18H22O10	[M+H]+	4-O-Sinapoylquinic acid	Phenolic acids	Phenolic acids	--	--	-	7526.2	6979.2	5983.3	9477.8	9193.9	12558	12060	8344.8	10246	11923	7907.3	14116	4647.6	7389.6	6819.5
pma6625	405.13	243.06	406.126	C20H22O9	[M-H]-	E-3,4,5'-Trihydroxy-3'-glucosylstilbene	Others	Stilbene	--	--	-	44784	44894	32930	31052	22209	37008	42980	9	9	9	9	9	33364	26937	21578
pmn001394	405.12	243.1	406.126	C20H22O9	[M-H]-	2,3,5,4'-Tetrahydroxystilbene-2-O-glucoside	Others	Stilbene	--	--	-	266530	282850	276320	95381	70688	81188	229370	389660	330540	265370	321860	195180	207320	210250	200780
Zmhn001746	405.12	243.07	406.127	C20H22O9	[M-H]-	Piceatannol-3'-O-glucoside	Others	Stilbene	--	--	94356-26-0	94617	87184	104830	25464	46730	29628	275260	238730	245850	248920	195350	248760	138050	178060	170200
pmb0500	411.19	177.05	410.184	C23H26N2O5	[M+H]+	N-p-Coumaroyl-N'-feruloylputrescine	Alkaloids	Phenolamine	--	--	380302-96-5	793160	664510	685450	832690	894850	748980	306720	397100	413490	557800	580230	592760	587630	591710	568840
Lmhn001773	416.06	179.03	415.054	C19H13NO10	[M-H]-	Caffeoylnicotinoyltartaric acid	Phenolic acids	Phenolic acids	--	--	-	38497	55731	53990	37214	53829	41740	50711	53857	35071	30399	44071	40298	39201	32736	30141
Lmbp003668	419.1	287.05	418.09	C20H18O10	[M+H]+	Kaempferol-3-O-arabinoside	Flavonoids	Flavonoid	--	--	-	812620	866320	814890	471090	470120	529710	406850	372110	358270	454160	488040	456430	544100	580440	556850
pmn001663	417.16	402.1	418.163	C22H26O8	[M-H]-	Syringaresinol	Lignans and Coumarins	Lignans	C10889	--	21453-69-0	240920	240040	219950	165900	165680	173390	117650	108550	115600	97592	101260	109130	138470	150280	140920
Hmcp005589	425.38	203.17	424.37	C30H48O	[M+H]+	β-Amyrenone	Terpenoids	Triterpene	--	--	638-97-1	9918.8	8846.4	7406.8	10190	9663	9372.7	11067	11692	10401	6500.2	10080	9002.3	11873	10783	10189
mws0919	431.1	285	432.106	C21H20O10	[M-H]-	Kaempferol-3-O-rhamnoside (Afzelin)(Kaempferin)*	Flavonoids	Flavonols	C16911	ko00944	482-39-3	12505000	12311000	11773000	2012500	1791500	1797400	1377500	1299300	1407800	955590	864780	869070	4554400	4441900	4443700
pme0321	431.1	285	432.106	C21H20O10	[M-H]-	Kaempferol-7-O-rhamnoside*	Flavonoids	Flavonols	--	--	20196-89-8	10673000	10833000	11350000	1500500	1547700	1684900	1263000	1185000	1181400	796800	861970	805380	4138700	3768600	4302600
Lmdp003509	435.09	303.06	434.085	C20H18O11	[M+H]+	Quercetin-3-O-xyloside (Reynoutrin)	Flavonoids	Flavonols	--	--	549-32-6	179230	140540	163470	203070	235600	235120	224310	260920	270280	424060	445770	498330	257980	270630	280230
Cmzn005251	433.11	271.06	434.121	C21H22O10	[M-H]-	6-O-Caffeoylarbutin	Phenolic acids	Phenolic acids	--	--	136172-60-6	68342	69629	73600	41823	29823	49705	132930	72831	85664	48403	64231	40650	58770	57509	51135
mws1179	433.11	271	434.121	C21H22O10	[M-H]-	Naringenin-7-O-glucoside (Prunin)	Flavonoids	Dihydroflavone	C09099	ko00941	529-55-5	785780	758450	856490	542810	480510	535210	1348900	1112200	1271700	1165100	1427600	1079700	905060	918810	986570
pma0692	438.24	147.04	437.231	C25H31N3O4	[M+H]+	N1,N10-Bis(p-coumaroyl)spermidine	Alkaloids	Phenolamine	C21169	--	114916-05-1	65003	83162	74437	128570	140170	163840	9	9	52887	70468	108960	108940	73995	110820	100010
Lmhp005550	441.2	177.05	440.195	C24H28N2O6	[M+H]+	N,N'-Diferuloylputrescine	Alkaloids	Phenolamine	--	--	42369-86-8	269160	233500	240290	99229	99560	89031	101530	133840	128560	160570	156530	174390	139730	151010	147630
pmp000575	447.13	285.18	446.121	C22H22O10	[M+H]+	Acacetin-7-O-glucoside (Tilianin)	Flavonoids	Flavonoid	--	--	4291-60-5	83778	74373	67878	55344	48749	57549	75301	73407	82682	75940	62886	70232	70374	67484	76219
Zmhn002909	445.11	323.08	446.122	C22H22O10	[M-H]-	6-O-Glucosyl-caffeoylbenzoic acid	Phenolic acids	Phenolic acids	--	--	-	33148	46900	43528	14651	10786	16056	23117	21415	22357	6174.4	9631.3	6985	15832	23364	22776
mws2209	449.11	287.06	448.101	C21H20O11	[M+H]+	Kaempferol-3-O-glucoside (Astragalin)	Flavonoids	Flavonols	C12249	ko00944,ko01110	480-10-4	1770800	1764100	2242600	734640	1120900	675260	943170	856970	754920	759510	1151700	788250	1650200	1572500	1313900
pme2459	449.11	287.2	448.101	C21H20O11	[M+H]+	Luteolin-7-O-glucoside (Cynaroside)	Flavonoids	Flavonoid	C03951	ko00944	5373-11-5	4273600	3611700	5141200	4947400	6754400	5405400	8875300	7493100	6966100	6242200	5160900	4313200	6691600	5333200	5554800
mws0045	449.11	303.05	448.101	C21H20O11	[M+H]+	Quercetin-3-O-rhamnoside(Quercitrin)	Flavonoids	Flavonols	C01750	ko00944	522-12-3	2254600	2365800	2019800	153410	145840	178480	293500	193830	215730	41607	74912	44704	446540	484780	490580
pmn001716	447.09	285.04	448.101	C21H20O11	[M-H]-	Carthamone	Flavonoids	Chalcones	C08598	--	86579-00-2	1373900	1569000	1423100	1464200	1113700	1115500	1345900	1416100	1416600	1093200	1213500	995050	1470500	1348000	1377800
mws0057	451.12	289	450.116	C21H22O11	[M+H]+	Eriodictyol-7-O-glucoside	Flavonoids	Dihydroflavone	--	--	38965-51-4	6699500	5981500	6210800	6855900	6279800	6493800	5861600	7304400	7365300	6371600	6549800	6035200	6562900	6354800	5933400
Lmtn002796	449.1	287.05	450.116	C21H22O11	[M-H]-	Aromadendrin-7-O-glucoside	Flavonoids	Flavonoid	--	--	28189-90-4	2664700	2683500	2786100	910140	1180700	1273500	1141200	819980	1006800	842680	941010	991010	1217300	1210600	1075000
Lmlp005236	451.12	289.08	450.116	C21H22O11	[M+H]+	Dihydrokaempferol-3-O-glucoside	Flavonoids	Dihydroflavonol	--	--	1049-08-8	5615300	5336600	5765600	5190200	5082700	4866600	6904000	7013700	8240400	9671500	9092100	9024200	6725400	6452500	6685700
HJN093	451.09	313.05	452.095	C20H20O12	[M-H]-	2-O-Salicyl-6-O-Galloyl-D-Glucose	Phenolic acids	Phenolic acids	--	--	-	123230	128550	120510	24209	24351	28018	17913	22311	20583	22265	20909	23144	44617	51724	40184
Lmzn006795	453.34	453.34	454.345	C30H46O3	[M-H]-	Ursonic acid	Terpenoids	Triterpene	--	--	6246-46-4	22766	24045	30582	29030	33387	30718	23663	26825	30132	21583	26805	28067	67582	65806	68002
GQ512004	456.25	310.21	455.242	C25H33N3O5	[M+H]+	N1-Dihydrocaffeoyl-N10-coumaroyl spermidine	Alkaloids	Phenolamine	--	--	-	15622	13854	17166	5050.4	7144.5	7998.3	13469	15725	24977	17261	18141	12640	19690	16762	9518.3
Lmhn004756	455.1	233.04	456.106	C23H20O10	[M-H]-	Cinnamoylferuloyltartaric acid	Phenolic acids	Phenolic acids	--	--	-	29546	31810	33401	23305	22698	21334	19849	18002	18693	13212	14267	12379	19721	24807	25423
mws4053	455.35	455.35	456.36	C30H48O3	[M-H]-	Ursolic acid	Terpenoids	Triterpene	C08988	--	77-52-1	6631	7822.8	8144.2	16777	9892.2	10329	6531.6	7498.8	10207	4679	3878.8	5766.3	10638	9245.6	13023
HJN110	455.36	455.36	456.36	C30H48O3	[M-H]-	Betulinic acid	Terpenoids	Triterpene	C08619	--	472-15-1	24695	24482	27814	22951	25252	24091	30634	29460	32702	27299	28696	27907	28183	30128	31968
mad2085	457.08	295.04	458.085	C22H18O11	[M-H]-	Caffeoyl-p-coumaroyltartaric acid	Phenolic acids	Phenolic acids	--	--	-	8091.3	9	11083	9	14233	14022	22638	20744	19183	15731	18734	17679	14050	12784	12814
pmb3054	457.1	163.1	458.121	C23H22O10	[M-H]-	O-p-Coumaroyl-O-salicyloyl quinic acid	Phenolic acids	Phenolic acids	--	--	-	9613.1	10857	6768.5	4261.2	4326.8	4240.6	9042	9166.5	7916.3	8495.2	9765	7559.9	6679.5	4935.6	7295.1
pmb2654	460.1	117.9	461.153	C19H27NO12	[M-H]-	Anthranilate-1-O-Sophoroside	Phenolic acids	Phenolic acids	--	--	-	242840	208500	224120	400470	377220	298000	515720	361090	525990	775420	668330	519790	444480	471120	456320
Lmhn002321	461.07	167.04	462.08	C21H18O12	[M-H]-	Vnilloylcaffeoyltartaric acid	Phenolic acids	Phenolic acids	--	--	-	36481	41396	39177	48112	36919	44201	76439	79119	86680	103450	77965	95263	54687	61499	63794
Lmmp003767	463.09	287.05	462.08	C21H18O12	[M+H]+	Kaempferol-7-O-glucuronide	Flavonoids	Flavonols	--	--	-	2508200	2472200	2584700	757770	724960	755470	672190	869600	864900	718940	786190	653520	1517900	1583600	1599500
mws4167	463.09	287.06	462.08	C21H18O12	[M+H]+	Luteolin-7-O-glucuronide	Flavonoids	Flavonoid	C03515	ko00944	29741-10-4	290440	301620	298710	264270	298110	279120	169240	178820	219930	239660	246480	245970	318710	341590	378070
pmp000012	463.09	287.05	462.08	C21H18O12	[M+H]+	Scutellarein-7-O-glucuronide (Scutellarin)	Flavonoids	Flavonoid	--	--	27740-01-8	282390	237890	270860	264400	300040	310990	190750	167590	213640	230490	271910	257970	325180	358400	340890
Lmjp003655	463.12	301.08	462.116	C22H22O11	[M+H]+	6-C-MethylKaempferol-3-glucoside	Flavonoids	Flavonoid	--	--	-	1659200	1661600	1703700	6200500	6909000	6243500	7740900	7274300	7695400	4959400	4138700	4483700	5460300	5994800	5540600
Hmgp002189	463.13	301.07	462.118	C22H22O11	[M+H]+	Hispidulin-7-O-Glucoside	Flavonoids	Flavonoid	C17762	--	17680-84-1	264010	257290	253810	66329	62454	63890	238230	212240	270120	196790	135840	175710	195290	193250	185010
Hmdn001667	463.05	300.99	464.06	C20H16O13	[M-H]-	Ellagic acid-4-O-glucoside	Tannins	Tannin	--	--	-	149530	168920	124860	40120	44000	52541	38007	45778	16822	34017	31487	34004	103210	67559	85763
mws0091	463.09	300.03	464.095	C21H20O12	[M-H]-	Quercetin-3-O-glucoside (Isoquercitrin)*	Flavonoids	Flavonols	C05623	ko00944,ko01100,ko01110	482-35-9	32554000	36632000	35101000	16481000	17514000	15314000	13767000	16775000	14680000	7563000	9241800	8324000	21255000	17248000	23111000
mws1329	463.09	300.7	464.095	C21H20O12	[M-H]-	Quercetin-7-O-glucoside*	Flavonoids	Flavonols	C12639	--	491-50-9	27028000	25706000	27084000	10708000	10285000	12024000	12126000	11745000	10031000	5802700	5591700	5971600	15075000	15607000	14991000
pmp001309	465.1	303.1	464.095	C21H20O12	[M+H]+	6-Hydroxykaempferol-7-O-glucoside	Flavonoids	Flavonols	--	--	-	354380	384080	520350	243440	261720	225990	292060	270100	323670	445390	520640	467530	345650	349770	330290
Lmzp002365	465.14	303.09	464.131	C22H24O11	[M+H]+	Hesperetin-7-O-glucoside	Flavonoids	Flavonoid	C16422	ko00941	31712-49-9	162930	157620	165560	132290	109560	128410	56527	61327	70250	91572	82754	105670	126420	122640	124990
Zmhn002545	463.12	323.08	464.131	C22H24O11	[M-H]-	4-O-(6'-O-Glucosylcaffeoyl)-3,4-dihydroxybenzyl alcohol	Phenolic acids	Phenolic acids	--	--	-	30124	21872	25831	31130	36042	35996	26588	28398	28325	36327	35510	28295	32942	36249	27045
pme1598	463.12	301	464.132	C22H24O11	[M-H]-	Hesperetin-5-O-glucoside	Flavonoids	Dihydroflavonol	--	--	69651-80-5	14791000	15041000	14410000	17123000	17351000	18480000	17249000	20915000	19158000	21427000	19812000	18925000	17946000	17563000	19151000
Xmsn002700	465.13	303.06	466.111	C21H22O12	[M-H]-	Taxifolin-3'-O-glucoside	Flavonoids	Flavonoid	--	--	31106-05-5	1519100	1495700	1805600	1042700	960220	959610	1023000	1166400	1048300	997230	1317400	1286200	1338900	1290900	1268700
Zmhn002508	471.15	309.1	472.158	C21H28O12	[M-H]-	4-p-Cumaroyl-rhamnosyl-(1→6)-D-glucose	Phenolic acids	Phenolic acids	--	--	-	40844	47406	33932	49703	60006	55459	50193	55279	58996	56319	64413	73197	43610	45836	44390
Lmzn006169	471.35	471.35	472.355	C30H48O4	[M-H]-	Pomolic acid	Terpenoids	Triterpene	--	--	13849-91-7	477240	345150	438040	687300	668630	679850	9	9	9	181130	172750	213260	285690	354120	330620
pmp000581	475.12	271.06	474.116	C23H22O11	[M+H]+	Apigenin-7-O-(6''-acetyl)glucoside	Flavonoids	Flavonoid	--	--	72741-92-5	33071	28655	32854	7293.8	6362.2	5434.6	77014	71889	71812	25891	20457	23053	42401	47272	38397
pmp000583	477.1	301.07	476.095	C22H20O12	[M+H]+	Diosmetin-7-O-glucuronide	Flavonoids	Flavonoid	--	--	35110-20-4	281640	254190	257030	397150	440190	423700	555090	661120	605060	547200	464770	468660	380560	446500	435090
Hmjp003123	479.08	303.06	478.075	C21H18O13	[M+H]+	Quercetin-5-O-glucuronide	Flavonoids	Flavonols	--	--	-	10168000	10474000	10205000	5381400	6208800	5822700	4344600	4228600	4126100	4126800	3853700	4455100	8254700	8903900	8618300
Zmhn004909	477.06	169.01	478.075	C21H18O13	[M-H]-	3,4-Digalloylshikimic acid	Phenolic acids	Phenolic acids	--	--	-	610310	578150	750670	542350	474150	662960	218640	228810	253480	320680	261600	381990	419370	588410	518890
Zmhn002764	477.11	323.07	478.111	C22H22O12	[M-H]-	4-O-(6'-O-Glucosylcaffeoyl)-3,4-dihydroxybenzoic acid	Phenolic acids	Phenolic acids	--	--	-	22502	25794	31136	34266	36697	24587	11660	12214	6402.8	25539	10539	16820	31339	25134	19736
Hmcp002207	479.12	317.06	478.111	C22H22O12	[M+H]+	Isorhamnetin-7-O-glucoside (Brassicin)*	Flavonoids	Flavonols	--	--	6743-96-0	49157	53782	61142	598300	535180	687130	434850	337370	336150	516790	459750	365780	415540	470570	456880
Lmjp003295	479.12	317.07	478.111	C22H22O12	[M+H]+	6-Methoxykaempferol-3-O-glucoside	Flavonoids	Flavonoid	--	--	63422-27-5	431510	476570	474920	1296100	1210800	1337100	911350	981730	1047200	1588600	1670000	1495300	1123600	1123500	1051600
Lmjp003044	479.12	317.06	478.111	C22H22O12	[M+H]+	Isorhamnetin-3-O-Glucoside*	Flavonoids	Flavonols	--	--	5041-82-7	58314	70522	51383	724110	640970	627140	475740	362770	409210	330510	538180	456770	281480	380930	323900
Zmhn003046	477.14	337.09	478.147	C23H26O11	[M-H]-	4-O-(6'-O-Glucosylferuloyl)-3,4-dihydroxybenzyl alcohol	Phenolic acids	Phenolic acids	--	--	-	16648	14201	18743	13064	19102	22113	9882.9	8226.2	8066.6	10389	7829.1	14178	15361	14035	18458
Lmnn002886	477.14	179.03	478.148	C23H26O11	[M-H]-	1'-O-(3,4-Dihydroxyphenethyl)-O-caffeoyl-glucoside	Phenolic acids	Phenolic acids	--	--	-	135030	135930	122250	104690	97465	96107	39355	48178	39146	50431	51636	54168	84266	108710	99534
Lmdp002969	481.1	319.06	480.09	C21H20O13	[M+H]+	Myricetin-3-O-galactoside	Flavonoids	Flavonols	--	--	15648-86-9	3014900	2927100	3131700	894160	1007300	857530	1498100	1553800	1777600	1319600	1176200	1280900	1610200	1805200	1840600
pmb3072	481.14	319.3	482.142	C22H26O12	[M-H]-	3-O-p-Coumaroylshikimic acid-O-glucoside	Phenolic acids	Phenolic acids	--	--	-	3149400	3022700	2563600	1636700	1735300	1524300	5266500	5764900	5239600	5426900	4651400	5036800	3640400	3876100	4032300
pmb3066	481.14	319.2	482.142	C22H26O12	[M-H]-	5-O-p-Coumaroylshikimic acid O-glucoside	Phenolic acids	Phenolic acids	--	--	-	193810	200730	213860	79196	106300	96485	323480	359840	356050	331400	303650	267380	234010	214620	217320
Lmfn000797	483.08	169.01	484.085	C20H20O14	[M-H]-	2,3-Di-O-Galloyl-D-Glucose	Tannins	Tannin	--	--	-	25423	43397	31136	9754.1	11723	10849	2183.6	9	9	2196.5	3442	3086.3	15031	12317	13029
pmb0769	485.1	323.1	484.185	C25H28N2O8	[M+H]+	N-(p-Coumaroyl)serotonin Glucoside	Alkaloids	Alkaloids	--	--	76423-56-8	81496	48799	61449	77442	90713	103080	78856	77030	75995	94137	98756	81381	81367	91698	66635
Lmhn002895	487.09	193.06	488.095	C23H20O12	[M-H]-	Feruloylcaffeoyltartaric acid	Phenolic acids	Phenolic acids	--	--	-	24222	16785	24554	35115	23597	13615	10537	20878	8737.7	12856	15019	19295	17755	12527	14031
Hmcn001296	487.15	179.03	488.152	C21H28O13	[M-H]-	Cistanoside F	Phenolic acids	Phenolic acids	--	--	97411-47-7	20118	14652	15149	19179	16722	16800	21879	29974	18582	9938.7	8481	10898	14077	15609	12574
Lmmn003398	489.11	285.04	490.111	C23H22O12	[M-H]-	Kaempferol-3-O-(6''-acetyl)glucoside	Flavonoids	Flavonols	--	--	-	14010000	14156000	10503000	8355600	11252000	8471200	6352800	6281600	5309700	4432700	5309100	7159800	9685400	11446000	7364500
HJAP005	495.11	333.07	494.105	C22H22O13	[M+H]+	Laricitrin-3-O-glucoside	Flavonoids	Flavonoid	--	--	39986-90-8	147490	142980	118510	3267700	3532200	3395200	1496200	1276500	1193900	1007000	844520	841220	1257800	1284500	1283100
Lmgp003989	499.13	163.04	498.116	C25H22O11	[M+H]+	Dicaffeoylshikimic acid	Phenolic acids	Phenolic acids	--	--	-	35174	59384	42962	52455	51417	52367	18217	22536	20754	20807	24313	23367	32828	32684	51722
pmb3064	499.15	163.2	500.153	C22H28O13	[M-H]-	3-O-p-Coumaroylquinic acid-O-glucoside	Phenolic acids	Phenolic acids	--	--	-	4892.1	3467.2	5620	5918.5	4581.5	7549.3	10751	14655	19930	10592	15387	20718	7691.1	12698	9533.4
pmb3061	499.15	163.1	500.153	C22H28O13	[M-H]-	5-O-p-Coumaroylquinic acid O-glucoside	Phenolic acids	Phenolic acids	--	--	-	28214	29867	22065	49312	42953	39718	70320	76535	61156	65057	60701	78966	40263	35360	51326
pmn001407	503.34	279.2	504.345	C30H48O6	[M-H]-	Platycogenic acid C	Terpenoids	Triterpene	--	--	26121-81-3	357550	328930	351230	243810	251080	246410	73579	75795	70588	186570	177550	233430	223450	240450	215670
Hmln002199	505.1	300.03	506.107	C23H22O13	[M-H]-	Quercetin-3-O-(6''-acetyl)galactoside	Flavonoids	Flavonols	--	--	-	454990	581820	527010	229490	383280	352100	832410	531000	650580	548820	573190	439450	414070	497500	706950
pmp000013	507.15	345.09	506.142	C24H26O12	[M+H]+	Eupatilin-7-O-glucoside	Flavonoids	Flavonoid	--	--	-	1150000	1053600	1036600	210520	178910	183560	358170	305400	382370	151240	136390	157960	394850	370530	398870
pmb3055	513.1	191.1	514.132	C22H26O14	[M-H]-	p-Coumaroylquinic acid-4'-O-glucuronide	Phenolic acids	Phenolic acids	--	--	-	11039	9850.4	9908.2	9825.7	12963	5752.9	10092	5732.4	8368.3	11387	11173	7030.1	7353.2	7368.8	10885
mws1584	515.12	191.05	516.127	C25H24O12	[M-H]-	1,3-O-Dicaffeoylquinic Acid (Cynarin)	Phenolic acids	Phenolic acids	C10445	--	30964-13-7	433560	506500	461040	310100	304860	332180	272880	261590	281880	324520	399480	430940	310520	326210	364220
pmn001382	515.12	353.09	516.127	C25H24O12	[M-H]-	Isochlorogenic acid A	Phenolic acids	Phenolic acids	--	--	2450-53-5	1079400	1938800	1474600	1019800	999450	788690	638030	566870	638040	529600	1493200	570250	919210	1264700	1003000
Wmzn002116	515.12	353.09	516.127	C25H24O12	[M-H]-	3,5-Dicaffeoylquinic acid	Phenolic acids	Phenolic acids	--	--	-	42450	41702	42239	38865	28502	25341	34001	32889	20524	28877	42295	40290	32268	24327	29535
Zmhn000785	515.16	341.11	516.169	C19H32O16	[M-H]-	Di-O-Glucosylquinic acid	Phenolic acids	Phenolic acids	--	--	-	22113	18607	17213	9	9	9	27891	16489	24078	26686	34183	16741	20470	20118	20596
pmp000585	519.11	433.11	518.106	C24H22O13	[M+H]+	Apigenin-7-O-(6''-malonyl)glucoside	Flavonoids	Flavonoid	C10020	--	86546-87-4	49934	45817	56071	32699	30026	28665	62189	61388	75797	73107	77931	69051	76563	65084	66019
Hmbn002692	517.16	175.04	518.164	C22H30O14	[M-H]-	6'-O-Feruloyl-D-sucrose	Phenolic acids	Phenolic acids	--	--	118230-77-6	77152	54458	42629	97062	93895	83598	120150	142190	131110	61162	96226	92972	102360	64004	86545
pmn001378	519.19	357.14	520.194	C26H32O11	[M-H]-	Pinoresinol-4-O-glucoside	Lignans and Coumarins	Lignans	C17529	--	41607-20-9	63310	35708	66802	35563	37079	37870	100070	88016	113920	75797	49687	65863	85074	54999	69115
Lmdp004892	535.11	287.05	534.101	C24H22O14	[M+H]+	Kaempferol-3-O-(6''-malonyl)galactoside	Flavonoids	Flavonols	--	--	-	2672300	2337100	2291800	1414500	1817900	1566700	3375400	3683100	4067900	5214600	5816300	5086900	3468400	4284300	3822600
pmp000587	535.11	449.1	534.101	C24H22O14	[M+H]+	Luteolin-7-O-(6''-malonyl)glucoside	Flavonoids	Flavonoid	C10103	--	-	81636	74982	79585	28026	36182	19452	28283	25916	29994	16885	18259	14113	44679	46687	33894
pmb0608	549.12	301.4	548.117	C25H24O14	[M+H]+	Chrysoeriol-7-O-(6''-malonyl)glucoside	Flavonoids	Flavonoid	--	--	-	393870	420150	428560	4871200	5531700	5207000	4247700	4105600	3711300	2917100	2814400	2779600	3558000	3585200	3690500
Hmln002189	549.09	505.11	550.096	C24H22O15	[M-H]-	Quercetin-3-O-(6''-malonyl)galactoside	Flavonoids	Flavonols	--	--	-	958560	1115500	1011800	627660	875640	654030	1177400	1110900	1283700	888580	871440	823060	1110900	1198000	1214100
pma0702	558.28	207.07	557.274	C29H39N3O8	[M+H]+	N1,N8-Bis(sinapoyl)spermidine	Alkaloids	Phenolamine	C21170	--	-	14875	16808	16714	13370	5282.8	10152	32183	39110	36261	10980	11694	13443	15621	20360	18723
Rfmb25702	561.2	357.13	562.205	C28H34O12	[M-H]-	Pinoresinol-4-O-(6''-acetyl)glucoside	Lignans and Coumarins	Lignans	--	--	-	73517	71374	51567	26334	45998	34266	87537	71885	65902	65153	75876	54151	50145	67387	55752
HJAP064	565.12	317.08	564.088	C25H24O15	[M+H]+	Isorhamnetin-3-O-(6''-malonylglucoside)	Flavonoids	Flavonoid	--	--	-	1134700	1313300	1249100	10476000	12547000	10411000	6193800	4154800	4149100	3907000	3171600	3557600	5675200	5861100	5608300
pmp001297	576.17	294.1	575.164	C27H29NO13	[M+H]+	Cartormin	Alkaloids	Alkaloids	--	--	-	47872	53683	47868	64226	51716	53314	283360	233040	265120	169900	168460	181070	142670	162050	158820
pmn001667	577.14	407.1	578.142	C30H26O12	[M-H]-	Procyanidin B4	Tannins	Proanthocyanidins	C10238	--	29106-51-2	15564	23870	35525	41779	40169	42344	27444	31208	35084	49993	37462	57595	35220	37122	30883
HJAP148	581.15	287.06	580.142	C26H28O15	[M+H]+	Kaempferol-3-O-sambubioside	Flavonoids	Flavonoid	--	--	27661-51-4	6484400	7558000	6807500	4381300	4240300	4747400	1892100	1941400	1570300	2170900	2451300	2094200	3585400	4017200	3692900
Lmqn001932	579.21	417.16	580.216	C28H36O13	[M-H]-	Syringaresinol-4'-O-glucoside	Lignans and Coumarins	Lignans	C10890	--	7374-79-0	13374	11358	22312	18248	20283	15412	20921	11071	19886	12987	18269	6491.6	13175	12170	16637
pmb0492	584.28	325	583.268	C34H37N3O6	[M+H]+	N',N'',N'''-p-Coumaroyl-cinnamoyl-caffeoyl spermidine	Alkaloids	Phenolamine	--	--	-	1917400	2107700	2219300	1602300	1568600	1484200	1682000	1633400	1678700	1831000	1934800	1914100	1858300	1782200	1816300
Lmsn002815	593.15	285.04	594.158	C27H30O15	[M-H]-	Kaempferol-3-O-rutinoside(Nicotiflorin)	Flavonoids	Flavonoid	C21833	ko00944,ko01110	17650-84-9	35942000	34895000	35455000	21050000	16857000	19685000	20220000	20255000	24295000	21321000	23609000	20909000	28504000	26891000	26820000
Zmhp002431	595.17	433.11	594.158	C27H30O15	[M+H]+	saffloquinoside A	Flavonoids	Chalcones	--	--	-	5035700	4747100	4321400	5356200	3131300	4535200	3404100	2852600	2947000	3971800	4556500	3760500	5252900	4374600	4745800
pme1665	593.15	311	594.158	C27H30O15	[M-H]-	Isovitexin-7-O-glucoside(Saponarin)	Flavonoids	Flavonoid carbonoside	C08064	--	20310-89-8	92042	101020	83500	109240	101250	106440	63909	74148	9	74748	74215	86032	105610	90302	85457
pmp001106	595.17	577.16	594.158	C27H30O15	[M+H]+	Vitexin-2''-O-glucoside	Flavonoids	Flavonoid carbonoside	C04024	ko00944	61360-94-9	708070	894250	879950	421740	410030	523380	497680	556830	588390	417520	403280	429030	474410	545230	480530
Lmtp004044	597.14	303.04	596.138	C26H28O16	[M+H]+	Quercetin-3-O-apiosyl(1→2)galactoside	Flavonoids	Flavonols	--	--	-	1166800	1214200	1167500	875920	858130	841030	252830	353000	276510	232540	291500	218320	653980	700890	581080
Lmqn000780	606.08	384.98	607.082	C17H27N3O17P2	[M-H]-	Uridine 5'-diphospho-N-acetylglucosamine	Alkaloids	Alkaloids	C00043	ko00520,ko01100	528-04-1	37630	36441	36920	104130	105110	129140	15347	15532	15683	33351	39295	32283	40873	41424	37792
Zmjp003031	611.16	449.11	610.153	C27H30O16	[M+H]+	Orientin-2''-O-galactoside	Flavonoids	Flavonoid	--	--	-	3310000	3127200	3193200	1836500	1646000	1458700	1953000	1866300	1963300	1505100	1625500	1600200	2254800	2091800	2057300
pmn001583	609.15	300	610.153	C27H30O16	[M-H]-	Quercetin-3-O-robinobioside*	Flavonoids	Flavonols	--	--	52525-35-6	10725000	10149000	11055000	4896100	4730200	4837900	9734600	9648700	12491000	11361000	11723000	11777000	9555700	9250300	10154000
Lmbp002336	611.16	303.05	610.153	C27H30O16	[M+H]+	Quercetin-3-O-(2''-O-rhamnosyl)galactoside	Flavonoids	Flavonols	--	--	-	84879	56092	83858	57068	87167	64473	31345	42972	32280	48031	60271	51155	88190	89248	40827
Zmhp003112	611.16	287.06	610.153	C27H30O16	[M+H]+	safflor yellow A	Flavonoids	Chalcones	--	--	-	3923800	4123600	4011300	2399000	2707500	2312000	3946000	4023500	4383100	3102700	3704200	3829300	4935000	4811500	4841700
mws0059	609.15	301	610.153	C27H30O16	[M-H]-	Quercetin-3-O-rutinoside (Rutin)*	Flavonoids	Flavonols	C05625	ko00944,ko01100,ko01110	153-18-4	20556000	18964000	17316000	8670700	9372000	10233000	18876000	20447000	21288000	22474000	21811000	22517000	17319000	18366000	18219000
Zmhn002032	609.18	447.13	610.189	C28H34O15	[M-H]-	4-O-(6'-O-Glucosylcaffeoylglucosyl)-4-hydroxybenzyl alcohol	Phenolic acids	Phenolic acids	--	--	-	594180	501770	670680	222890	279310	241930	225970	229600	256270	226520	240030	202960	347690	329100	352550
mws4046	613.18	451	612.169	C27H32O16	[M+H]+	Safflomin A	Quinones	Quinones	--	--	78281-02-4	1840200	1691700	1379800	1714400	1927400	2186300	1415200	1581500	1688500	2104900	1758500	1378100	1980100	1626200	1630100
Zmhp001838	613.18	451.12	612.169	C27H32O16	[M+H]+	saffloquinoside D	Flavonoids	Chalcones	--	--	-	1105200	1173600	988150	1245000	898020	1230700	766520	909090	868970	923770	836300	1008800	1077900	1023400	865430
pmp001299	615.17	123	614.164	C30H30O14	[M+H]+	Safflomin C	Quinones	Quinones	--	--	126093-98-9	24942000	25572000	25060000	25585000	22330000	24140000	20198000	19779000	20744000	26515000	25494000	28993000	17573000	23051000	21497000
Rfmb26201	621.22	417.16	622.226	C30H38O14	[M-H]-	Syringaresinol-4'-O-(6''-acetyl)glucoside	Lignans and Coumarins	Lignans	--	--	-	849120	957340	865950	636230	541820	729270	458010	398450	449050	347430	382240	315540	540690	653820	476880
Lmzn001664	623.13	447.1	624.133	C27H28O17	[M-H]-	Kaempferol-3-O-glucuronide-7-O-glucoside	Flavonoids	Flavonols	--	--	-	23497000	24492000	22467000	21351000	21052000	21191000	18430000	21194000	21855000	23095000	18896000	22167000	26972000	28332000	26039000
HJN051	623.16	315.05	624.168	C28H32O16	[M-H]-	Tamarixetin-3-O-rutinoside	Flavonoids	Flavonoid	--	--	-	519650	634450	655380	19080000	17842000	17689000	17099000	12224000	15592000	13527000	12979000	14019000	11401000	13228000	11800000
pme1540	625.18	317.06	624.169	C28H32O16	[M+H]+	Isorhamnetin-3-O-neohesperidoside	Flavonoids	Flavonols	--	--	55033-90-4	9	9	9	183220	139790	168010	91144	88225	96217	91462	69506	64073	69153	67183	73886
Lmnp002584	625.18	463.13	624.169	C28H32O16	[M+H]+	Hispidulin-8-C-(2''-O-glucosyl)glucoside	Flavonoids	Flavonoid carbonoside	--	--	-	407740	448800	436490	375100	381560	384090	348000	296400	348600	336880	347580	366320	517350	547000	525790
Hmln002149	623.2	461.17	624.205	C29H36O15	[M-H]-	Acteoside	Phenolic acids	Phenolic acids	C10501	--	61276-17-3	9	9	9	176830	214410	156650	18791	17084	25182	95099	166300	176000	88410	112550	78495
Hmlp003068	627.15	303.05	626.148	C27H30O17	[M+H]+	Meratin	Flavonoids	Flavonoid	--	--	27215-04-9	5226800	7284800	5289500	4187000	5671500	7953500	5291500	3485900	5770600	4036300	2841300	3156400	5502600	4149500	3883700
pmp000596	627.16	465.1	626.148	C27H30O17	[M+H]+	Quercetin-3-O-(2''-O-galactosyl)glucoside	Flavonoids	Flavonols	--	--	56782-99-1	540380	576230	506190	694430	662510	652640	438640	398930	387430	559430	489040	477100	546420	527020	545770
pma2088	627.16	465	626.148	C27H30O17	[M+H]+	Quercetin-3,4'-O-di-glucoside	Flavonoids	Flavonols	--	--	29125-80-2	375750	450990	356130	48929	71325	59677	64931	94237	77375	74673	52399	59223	217470	206080	200110
Zmhp002730	627.16	303.05	626.148	C27H30O17	[M+H]+	6-Hydroxykaempferol 6,7-Diglucoside*	Flavonoids	Flavonoid	--	--	142674-16-6	26401000	28023000	24315000	16116000	14805000	15674000	18092000	17665000	17073000	17173000	17212000	17075000	20729000	22085000	23352000
Zmhp102730	627.16	303.05	626.148	C27H30O17	[M+H]+	6-Hydroxykaempferol 3,6-Diglucoside*	Flavonoids	Flavonoid	--	--	-	27441000	28270000	26237000	16685000	16201000	15562000	18708000	18871000	18307000	17026000	17273000	18201000	22615000	23489000	21778000
Lmtp003677	627.16	303.04	626.148	C27H30O17	[M+H]+	Quercetin-3-O-sophoroside (Baimaside)	Flavonoids	Flavonols	C12667	ko00944	18609-17-1	1103300	837730	890730	1078900	1385700	1236500	662210	786720	762900	985440	987980	894960	1171400	1196400	1048300
Lmsp003729	627.16	319.05	626.148	C27H30O17	[M+H]+	Myricetin-3-O-rutinoside	Flavonoids	Flavonols	--	--	-	85058	117110	122910	9	9	9	49866	54708	80485	112570	105320	81579	52295	61285	59334
pmn001529	629.08	169	630.086	C28H22O17	[M-H]-	3,4,5-Tri-O-Galloylshikimic acid	Phenolic acids	Phenolic acids	--	--	-	35948	38419	23220	12325	13589	11300	13511	17094	9	10085	10488	7627.5	20244	18034	18809
Lmmp002560	641.13	303.05	640.128	C27H28O18	[M+H]+	Quercetin-3-O-(2''-O-glucosyl)glucuronide	Flavonoids	Flavonols	--	--	-	805430	765710	853360	191340	342900	231480	290110	242670	352870	231600	235600	230610	554570	644910	598820
Lmsp003252	641.17	317.07	640.164	C28H32O17	[M+H]+	Isorhamnetin-3-O-sophoroside	Flavonoids	Flavonols	--	--	-	119830	120190	111530	33357	26805	38925	60603	85587	77983	57857	53527	44788	80167	90985	58136
pmb0475	671.18	509	670.174	C29H34O18	[M+H]+	Gallic acid-4-O-(6'''-feruloyl)sophoroside	Tannins	Tannin	--	--	-	95203	92955	107090	251630	277890	248990	445050	385110	456440	411100	367230	424300	330770	325700	347030
HJN102	677.17	515.14	678.158	C34H30O15	[M-H]-	3,4,5-Tricaffeoylquinic acid	Phenolic acids	Phenolic acids	--	--	86632-03-3	48851	81005	47264	53155	34775	38178	21431	23138	22010	7755.8	15300	11026	21592	38278	22807
Lmgn002250	677.17	191.06	678.18	C31H34O17	[M-H]-	Dicaffeoylquinic acid-O-glucoside	Phenolic acids	Phenolic acids	--	--	-	38273	55043	43960	266420	242600	191070	319890	408420	420920	425180	348680	408760	238960	233970	298700
Lmmn004145	675.41	397.14	679.419	C38H60O10	[M-H]-	3-O-(2-O-Acetyl-glucosyl)oleanolic acid	Terpenoids	Triterpene	--	--	-	437760	591960	555430	515150	426400	446550	747820	729820	780260	537900	624700	504940	845730	914480	916600
pmn001370	681.24	519.19	682.247	C32H42O16	[M-H]-	Pinoresinol-4,4'-O-di-O-glucoside	Lignans and Coumarins	Lignans	--	--	63902-38-5	18487	26092	11823	58023	32089	46349	38828	39459	24919	50417	65463	47073	41321	43553	33112
Hmcp001629	697.16	449.1	696.153	C30H32O19	[M+H]+	Kaempferol-3-O-(6''-Malonyl)glucoside-7-O-Glucoside	Flavonoids	Flavonols	--	--	-	37746	28989	39435	28175	51590	52487	16716	9179.6	15482	16685	16716	21926	29165	29217	26393
Lmgn002253	695.2	353.09	696.19	C31H36O18	[M-H]-	Syringoylcaffeoylquinic acid-D-glucose	Phenolic acids	Phenolic acids	--	--	-	110140	146560	102990	102210	87140	84845	224970	205280	251230	184520	189490	196980	167940	114390	171730
pmb0709	713.16	465.2	712.149	C30H32O20	[M+H]+	Quercetin-7-O-(6''-malonyl)glucosyl-5-O-glucoside	Flavonoids	Flavonols	--	--	-	291300	252190	312820	411970	417120	440340	253900	229810	200530	221200	270940	322740	336310	382240	379190
Lmsp003161	757.22	287.06	756.211	C33H40O20	[M+H]+	Kaempferol-3-O-sophoroside-7-O-rhamnoside	Flavonoids	Flavonols	--	--	-	648620	624310	621400	31549	41373	38293	24580	39487	30790	7219	10184	10430	258420	216350	244150
pmp001105	757.22	287.06	756.211	C33H40O20	[M+H]+	Kaempferol-3-O-neohesperidoside-7-O-glucoside	Flavonoids	Flavonols	--	--	-	541140	622850	637690	29491	39058	33649	25507	33251	19115	8811.9	13598	6513.4	257590	220950	221830
Lmmp002334	773.21	303.05	772.206	C33H40O21	[M+H]+	Quercetin-3-O-rutinoside-7-O-glucoside	Flavonoids	Flavonols	--	--	-	1495900	1338500	1359900	437910	535100	524090	599220	622030	687620	559850	547970	646130	885510	1022700	858530
Lmqp002170	773.21	449.11	772.206	C33H40O21	[M+H]+	Kaempferol-3-O-sophorotrioside	Flavonoids	Flavonols	C12635	ko00944	80714-53-0	279610	298540	307940	241100	300750	221910	844430	857280	890160	432080	386320	428090	435010	527830	476530
Lmsp002982	773.21	303.05	772.206	C33H40O21	[M+H]+	Quercetin-3-O-sophoroside-7-O-rhamnoside	Flavonoids	Flavonols	--	--	-	256380	333350	264110	221040	218220	210660	214180	213270	136630	157200	207230	190660	249700	283490	262960
pmp001314	773.21	627.2	772.206	C33H40O21	[M+H]+	6-Hydroxykaempferol-3-O-rutin-6-O-glucoside	Flavonoids	Flavonols	--	--	-	30225000	30516000	30696000	22012000	20911000	21402000	19997000	19980000	20200000	27867000	27906000	27235000	27642000	26003000	26196000
Lmmp001965	789.2	465.1	788.201	C33H40O22	[M+H]+	Gossypetin-3-O-rutinoside-8-O-glucoside	Flavonoids	Flavonols	--	--	-	28939000	27601000	26028000	21816000	25214000	24937000	24439000	24345000	25610000	16497000	17605000	16277000	25967000	23674000	22233000
pmp001312	789.21	303.1	788.201	C33H40O22	[M+H]+	6-Hydroxykaempferol-3,7,6-O-triglycoside	Flavonoids	Flavonols	--	--	-	3038800	2985300	3109400	2535100	2833300	2668200	2568800	2781500	2526000	1731600	1813100	1726900	2844000	2748300	2750900
pmp001313	803.19	303.1	802.18	C33H38O23	[M+H]+	6-Hydroxykaempferol-3,6-O-Diglucoside-7-O-Glucuronic Acid	Flavonoids	Flavonols	--	--	-	28855000	29111000	30008000	26721000	26715000	27130000	17538000	18420000	19302000	15845000	20284000	20569000	28274000	25831000	26187000
pmp001300	911.22	569.1	910.217	C43H42O22	[M+H]+	Carthamin	Flavonoids	Chalcones	C16941	--	36338-96-2	1880400	2025000	1967000	2217200	2169600	2103700	1348600	1242100	1339900	1702800	1607900	1650600	1628200	2075600	2257000
Lmwp004293	935.25	303.05	934.238	C42H46O24	[M+H]+	Quercetin-3-O-(2'''-p-coumaroyl)sophoroside-7-O-glucoside	Flavonoids	Flavonols	--	--	-	23388	34247	27118	7793.8	4981.4	7418.8	11914	19542	18312	26977	15459	22639	11155	15611	15069
pmp001301	957.23	345.1	956.222	C44H44O24	[M+H]+	Precarthamin	Others	Others	--	--	168216-23-7	2650300	2665100	3118400	4387700	3907800	3986000	4154600	3961400	3907500	6270100	5831200	5900100	5794200	5182200	5501600
pmp001302	1045.3	433.1	1044.23	C48H52O26	[M+H]+	Anhydrosafflor yellow B	Others	Others	--	--	184840-84-4	12717000	13945000	12852000	22131000	22764000	21801000	13203000	13145000	13908000	18268000	17359000	17709000	17203000	18760000	17525000
Zmhn003108	1061.28	611.16	1062.29	C48H54O27	[M-H]-	safflor yellow B	Flavonoids	Chalcones	--	--	-	19217	17524	12923	51359	31050	37587	26044	17353	31011	20281	31957	43374	27572	38858	39109
