# Supplementary material for: Identification of a secondary Q-marker in high-quality ecotypes of Carthamus tinctorius L. and exploration of the target preference
Source: Royal Society of Chemistry journal article supplement (doi:10.1039/d2fo02596e), 2023-01-01
Supplement: d2fo02596e10.pdf [file d2fo02596e10.pdf]

## Supporting Information

Description of supplementary data:

**Table S1.** List of *Carthamus tinctorius* L. samples used in this study

**Table S2.** Supplementary file of Secondary Metabolome data(xlsx)

**Table S3.** Supplementary file of Volatile Metabolome data(xlsx)

**Figure S1.** Identification of secondary metabolites of Sichuan *C. tinctorius*. (The left picture shows negative ion mode, and the right picture shows positive ion mode.) The multi-peak chromatogram of metabolite detection by MRM (multi-substance extracted ion current (XIC)).

**Figure S2.** Identification of secondary metabolites of Henan *C. tinctorius*. (The left picture shows negative ion mode, and the right picture shows positive ion mode.) The multi-peak chromatogram of metabolite detection by MRM (multi-substance extracted ion current (XIC)).

**Figure S3.** Identification of secondary metabolites of Xinjiang *C. tinctorius*. (The left picture shows negative ion mode, and the right picture shows positive ion mode.) The multi-peak chromatogram of metabolite detection by MRM (multi-substance extracted ion current (XIC)).

**Figure S4.** Identification of secondary metabolites of Yunnan *C. tinctorius*. (The left picture shows negative ion mode, and the right picture shows positive ion mode.) The multi-peak chromatogram of metabolite detection by MRM (multi-substance extracted ion current (XIC)).

**Figure S5.** Identification of volatile metabolites. (A)TIC (Total ionscurrent ) of the QC samples for mixed samples. (B)The multi-peak chromatogram of metabolite detection by MRM (multi-substance extracted ion current (XIC)).

**Figure S6.** PPI (protein-protein-interaction) network of differential metabolites of *C. tinctorius* from Sichuan(others VS Sichuan, fold change  $\leq 0.5$  or  $\geq 2$ , VIP $\geq 1$ ). (A) PPI network of secondary differential metabolites. (A) PPI network of volatile differential metabolites.

**Figure S7.** Molecular docking results of differential metabolites in *C. tinctorius* from different producing areas (CA2 and PTGS2).
