# Supplementary material for: Identification of a secondary Q-marker in high-quality ecotypes of Carthamus tinctorius L. and exploration of the target preference
Source: Royal Society of Chemistry journal article supplement (doi:10.1039/d2fo02596e), 2023-01-01
Supplement: d2fo02596e11.xlsx [file d2fo02596e11.xlsx]

## Sheet: Sheet1
Table S3. Supplementary file of Volatile Metabolome data
Index	Exact mass(Da)	Formula	NIST_RI	RT	RI	Compounds	Class	cpd_ID	kegg_map	CAS	Match factor	SCM1	SCM2	SCM3	SCM4	SCM5	SCM6	YNM1	YNM2	YNM3	YNM4	YNM5	YNM6	HNM1	HNM2	HNM3	HNM4	HNM5	HNM6	XJM1	XJM2	XJM3	XJM4	XJM5	XJM6	mix01	mix02	mix03
KMW0153	136.125	C10H16	938	8.95	926.46	α-thujene	Terpenes	--	--	2867-05-2	87.41	63645.2	120384	55011.6	54333	54103	68029.9	54877	41722.6	70534.6	65896.8	54023.4	55220.5	99422.3	83878.4	86491.1	66665	94723	70925.7	113917	92017.2	59653.1	66745.1	84864.6	84169.5	71209.6	64818.6	63225
KMW0178	136.125	C10H16	972	10.49	978.63	Bicyclo[3.1.0]hexane, 4-methylene-1-(1-methylethyl)-	Terpenes	C16777	--	3387-41-5	70.99	58357.4	65783.4	49003.6	47412.2	61943.9	71801.1	17868.5	15120.7	28932	22196.1	17610.6	17623.2	174697	142538	121251	90570	98150.8	132908	282412	200841	139431	167254	105898	97314.1	110683	113985	111626
KMW0220	136.125	C10H16	1009	9.16	933.73	3-Carene	Terpenes	--	--	13466-78-9	93.99	865778	276861	716267	689847	992248	1.19273e+06	349570	307416	697592	621214	467814	427685	1.20815e+06	1.11532e+06	809969	749629	488121	1.1028e+06	2.20605e+06	1.62766e+06	1.06578e+06	1.24697e+06	854066	794198	854635	903670	795713
KMW0254	152.12	C10H16O	1062	14.11	1097.75	1,5-Heptadien-4-one, 3,3,6-trimethyl-	Terpenes	--	--	546-49-6	65.14	87780.9	198774	102133	70881.1	77350.4	59270	55685	53417.8	48918.9	47211.1	45440.3	48443.3	118777	99397	104239	113536	202566	100211	47501.3	45709	57544.2	53028	114719	154137	85879.3	57168	57614.9
KMW0259	136.125	C10H16	1074	12.93	1059.06	.gamma.-Terpinene	Terpenes	C09900	--	99-85-4	95.41	1.00976e+06	1.79248e+06	902485	1.24248e+06	1.21075e+06	1.21844e+06	1.01394e+06	833735	1.2611e+06	988932	1.03681e+06	959538	1.04102e+06	845450	1.1742e+06	455388	812939	701354	1.63158e+06	1.34425e+06	795042	959834	1.3271e+06	1.2984e+06	1.03331e+06	1.10433e+06	1.0596e+06
KMW0360	156.151	C10H20O	1171	16.52	1178.81	Levomenthol	Terpenes	C00400	ko00902,ko01110	2216-51-5	98.31	88897.1	229207	85643.2	97125.9	96880.7	95313	112481	86027	107391	107176	84151.5	93253.6	5.25462e+06	4.43759e+06	4.58841e+06	3.07778e+06	6.78842e+06	4.10566e+06	139064	99422.3	60451.5	72434.2	130488	134482	947592	886205	919206
KMW0448	150.104	C10H14O	1255	18.39	1243.97	D-Carvone	Terpenes	C11383	ko00902,ko00903,ko01110	2244-16-8	96.52	11961.2	13212.9	5003.79	4704.76	4452.84	6324.97	12847.9	9781.36	12667.6	11816.4	9838.06	9454.09	1.2338e+07	1.07343e+07	1.0179e+07	7.57922e+06	1.51902e+07	1.01959e+07	39277.5	12799.6	7919.48	7864.32	9327.21	8126.38	2.25093e+06	2.17052e+06	2.25705e+06
KMW0565	204.188	C15H24	1467	30.72	1742.28	Caryophyllene	Terpenes	C09629	ko00909,ko01100,ko01110	87-44-5	85.22	5285.2	7625.39	2724.07	4456.46	5825.82	6415.11	7061.84	5935.28	10882.9	9187.62	7961.91	7817.01	10440	10270.1	8930.06	6304.95	8403.68	8805.6	15739.7	11144.6	9042.63	10502	11256.1	9958.98	6009.83	7243.91	8085.93
KMW0590	204.188	C15H24	1490	22.99	1413.59	Naphthalene, 1,2,3,5,6,7,8,8a-octahydro-1,8a-dimethyl-7-(1-methylethenyl)-, [1R-(1.alpha.,7.beta.,8a.alpha.)]-	Terpenes	C17277	ko00909	4630-07-3	85.7	2.77931e+06	3.85634e+06	1.6275e+06	2.17428e+06	2.68518e+06	2.89997e+06	4.32081e+06	3.18734e+06	6.1267e+06	5.57765e+06	4.83649e+06	4.84426e+06	3.00671e+06	2.51265e+06	2.23127e+06	1.66079e+06	2.50296e+06	2.3069e+06	3.796e+06	2.68534e+06	2.46398e+06	2.93539e+06	3.11189e+06	2.88751e+06	2.37423e+06	2.49648e+06	2.82493e+06
KMW0247	136.125	C10H16	1053	10.33	973.06	.beta.-Phellandrene	Terpenes	C19818	--	555-10-2	83.31	50518.7	110701	48599.2	63130	60104.8	51890.3	77242.7	55802.1	69164.7	72076	61375.5	54853.5	97037.9	81311.3	88105.9	67286	91088.1	70253.7	125664	102314	69018.4	79419.8	96104.9	92355.5	65104.8	65253.4	66977.1
KMW0334	154.136	C10H18O	1142	15.87	1156.82	Cyclohexanone, 5-methyl-2-(1-methylethyl)-	Terpenes	--	--	10458-14-7	95.58	9537.53	14504.1	11016.7	13374.6	12597.3	12083.7	15409.7	11752.2	15566.8	14642	8619.3	9951.51	4.29915e+06	3.5431e+06	4.05884e+06	2.26884e+06	5.04897e+06	3.14413e+06	14821.9	7753.21	6707.13	8509.52	13111.4	11376.9	796318	750935	820451
KMW0614	204.188	C15H24	1527	21.29	1349.22	Cubenene	Terpenes	--	--	29837-12-5	66.33	18570	32501.3	17033.3	15072.7	18629.2	20217.3	17644.2	14459.9	25675.6	24561.4	19743.1	21167.7	11157.2	8991.82	10191.2	7197.78	10328.4	9289.1	16714	10604.5	10200.9	12905.7	14841.3	14960.5	9766.92	10688.1	12724.6
KMW0618	204.188	C15H24	1519	25.64	1519.88	Naphthalene, 1,2,3,5,6,8a-hexahydro-4,7-dimethyl-1-(1-methylethyl)-, (1S-cis)-	Terpenes	C06394	ko00909,ko01100,ko01110	483-76-1	87.11	250063	383667	180211	153508	227689	267265	1.34206e+06	898758	1.73045e+06	1.51663e+06	1.29364e+06	1.45149e+06	337367	284799	263182	201477	322450	317808	848402	551832	548790	753569	917685	863473	439821	497565	516303
KMW0643	220.183	C15H24O	1573	27.21	1585.66	Caryophyllene oxide	Terpenes	C16908	--	1139-30-6	74.3	609897	876595	500516	320758	578046	711143	543708	360456	662985	574595	512176	635333	357605	338075	274161	226101	370981	400317	549830	365939	366475	544202	774196	685227	305628	396402	366573
WMW0015	154.136	C10H18O	1137	13.3	1071.07	Terpinen-4-ol	Terpenes	C17073	--	562-74-3	78.53	81250.3	199050	68877.1	71028.1	84107.6	78861.3	109742	80100.1	88195.3	80874.1	70183.9	81857.9	123265	97369.6	94270.7	72790.8	132670	82539.7	135395	97829.1	76265.3	91716.3	132603	144167	81347.6	85674.7	84618.2
KMW0583	192.151	C13H20O	1493	24.62	1478.08	trans-.beta.-Ionone	Terpenes	C12287	--	79-77-6	80.37	235893	326990	169237	124372	197481	245984	179225	114290	221071	190500	167394	201074	442614	406628	340946	276233	433384	461219	396673	254492	237513	334440	373324	306413	189264	212572	198102
KMW0639	208.146	C13H20O2	1610	24.69	1481.13	3-Buten-2-one, 4-(2,2,6-trimethyl-7-oxabicyclo[4.1.0]hept-1-yl)-	Terpenes	--	--	23267-57-4	90.94	1.4164e+06	2.35676e+06	1.61613e+06	1.05954e+06	1.49296e+06	1.81168e+06	1.7652e+06	1.09669e+06	1.92968e+06	1.63833e+06	1.56267e+06	1.95407e+06	1.2401e+06	1.1164e+06	975626	807703	1.27935e+06	1.23891e+06	2.85742e+06	1.87632e+06	1.71946e+06	2.38114e+06	3.16104e+06	2.56097e+06	1.2431e+06	1.40616e+06	1.35301e+06
KMW0692	268.277	C18H36O	1770	32.78	1839.65	2-Pentadecanone, 6,10,14-trimethyl-	Ketone	--	--	502-69-2	96.21	1.16091e+06	1.50899e+06	1.13162e+06	551391	1.18727e+06	1.13918e+06	592595	417509	509868	423846	423962	587272	744045	689142	552368	483015	720237	837469	615076	394982	297029	523579	818911	737539	340480	516401	438712
KMW0056	88.089	C5H12O	766	4.32	723.98	1-Pentanol	Alcohol	C16834	--	71-41-0	95.24	477208	832594	594241	632568	781773	886179	2.40756e+06	2.0241e+06	2.14909e+06	2.18358e+06	1.98464e+06	2.06354e+06	240442	218242	194018	184538	229456	188553	611632	505892	337168	409813	725671	719521	931046	1.07685e+06	980073
KMW0143	116.12	C7H16O	925	8.2	901.33	2-Heptanol	Alcohol	--	--	543-49-7	91.71	797968	1.54147e+06	1.01623e+06	1.07543e+06	1.16532e+06	1.26229e+06	5.07608e+06	4.00867e+06	3.473e+06	3.43632e+06	3.26917e+06	3.44974e+06	750539	714798	843118	574000	947764	684960	1.07823e+06	894340	565212	678784	1.50403e+06	1.51743e+06	1.59304e+06	1.59049e+06	1.52768e+06
KMW0173	128.12	C8H16O	982	10.52	979.68	1-Octen-3-ol	Alcohol	C14272	--	3391-86-4	66.73	432585	1.13476e+06	480730	540649	420606	399867	967065	738760	640183	637634	517762	536873	127626	164135	176996	130207	234912	163598	207944	193497	141275	161376	227932	241004	307800	303714	302406
KMW0323	108.058	C7H8O	1039	12.14	1033.12	Benzyl alcohol	Alcohol	C00556	ko01100	100-51-6	92.35	707959	1.59394e+06	834152	735923	1.07311e+06	1.18929e+06	1.6103e+06	1.19939e+06	1.17521e+06	1.14655e+06	1.14766e+06	1.45105e+06	219031	197636	182927	135427	248758	170635	117005	103954	65957	77675.4	215338	228376	654418	808959	663393
KMW0456	158.167	C10H22O	1263	13.47	1076.9	1-Decanol	Alcohol	C01633	--	112-30-1	85.71	239299	440755	308354	376801	314422	196008	213755	158927	294573	291720	148057	138330	167665	123751	168374	59791.7	171037	105127	225295	180755	111258	121529	169999	132498	158765	148497	145492
KMW0175	94.042	C6H6O	980	10.45	977.26	Phenol	Aromatics	C00146	ko00350,ko01100	108-95-2	63.63	104909	210494	96844.3	92645.3	99562.4	109833	273888	188298	224674	223543	208484	228526	134694	117331	108035	83875.1	158176	112713	150622	113296	91903.2	112720	171869	159805	111721	109469	109490
KMW0258	124.052	C7H8O2	1089	12.72	1052.29	Phenol, 2-methoxy-	Aromatics	C01502	--	90-05-1	71.01	61035.6	159904	75798.8	75027.7	72178.9	72305.4	79892.9	57987.7	70112.1	73071.2	54963.9	59458.8	21572.4	18132.3	18223.2	11751.3	29415.7	17990.3	40498.5	29160.3	20388	26165.9	45045.9	44268.7	40831.4	40640.7	39774
KMW0284	122.073	C8H10O	1118	14.52	1111.48	Phenylethyl Alcohol	Alcohol	C05853	ko00360	60-12-8	95.23	1.12947e+06	2.53788e+06	1.68506e+06	1.41995e+06	2.03928e+06	1.90827e+06	8.72501e+06	5.88624e+06	6.80504e+06	6.86148e+06	5.92136e+06	6.86964e+06	1.59114e+06	1.34549e+06	1.51583e+06	1.02645e+06	2.18119e+06	1.13772e+06	1.87071e+06	1.40218e+06	1.03712e+06	1.34269e+06	3.13733e+06	2.89963e+06	3.00585e+06	3.11252e+06	2.95782e+06
KMW0404	128.063	C10H8	1214	16.72	1185.37	Naphthalene	Aromatics	--	--	91-20-3	97.97	288628	503515	276473	345745	362385	381319	4.58632e+06	3.35496e+06	5.25197e+06	4.94685e+06	4.39434e+06	4.4998e+06	162581	140345	144453	97840.7	171973	128363	275977	199587	153156	185451	219948	192609	781378	917332	1.06452e+06
KMW0408	150.104	C10H14O	1166	16.74	1186.27	Benzenemethanol, .alpha.,.alpha.,4-trimethyl-	Terpenes	--	--	1197-01-9	72.82	189182	511788	235984	161696	244452	233190	82986.2	58981.7	65818.7	67198.2	54760.5	68827.2	144217	112684	126117	79006.5	186431	95711.4	93295.9	66453.8	46628.6	65437.8	147047	150942	69345.1	85298.4	78636.8
KMW0704	200.157	C15H20	1859	26.2	1543.28	.alpha.-Calacorene	Terpenes	--	--	21391-99-1	91.85	188880	275022	160137	108904	170379	201654	1.63271e+06	1.06206e+06	1.7134e+06	1.44156e+06	1.31543e+06	1.63253e+06	315192	288072	240997	203549	294027	336576	790971	510325	460787	687567	1.00706e+06	856092	445289	518621	494841
KMW0182	138.104	C9H14O	993	10.82	989.84	Furan, 2-pentyl-	Heterocyclic compound	--	--	3777-69-3	81.3	824539	1.38538e+06	893795	1.13617e+06	1.0107e+06	969528	811710	553381	634980	541370	474572	476349	261439	204373	281602	159955	227907	188791	456481	359156	232451	274689	406409	356805	396896	393199	420001
KMW0190	122.084	C7H10N2	1000	11.13	1000.2	Pyrazine, trimethyl-	Heterocyclic compound	--	--	14667-55-1	83.36	65598.5	165412	69236.5	70632.9	76873.4	76517	428282	317437	378081	385728	317302	317069	312362	270392	263932	179795	452158	312964	373746	288565	202894	238122	463009	473034	251582	224249	216614
KMW0066	100.089	C6H12O	801	5.54	795.52	Hexanal	Aldehyde	--	--	66-25-1	94.77	1.49619e+06	2.65914e+06	1.58793e+06	1.69637e+06	1.69175e+06	1.83812e+06	1.15875e+06	912737	838984	810111	704583	723851	240436	207208	252678	203463	301180	250053	436258	356844	234316	273160	530003	524585	581632	557027	520978
KMW0158	106.042	C7H6O	960	9.94	959.93	Benzaldehyde	Aldehyde	C00193	--	100-52-7	96.98	3.91605e+06	8.14247e+06	4.89873e+06	5.46701e+06	4.77563e+06	4.70634e+06	1.3499e+07	1.03842e+07	1.28215e+07	1.19632e+07	9.62585e+06	9.55738e+06	4.14978e+06	3.81458e+06	3.6518e+06	2.99303e+06	4.91208e+06	3.58498e+06	4.58535e+06	3.65977e+06	2.57509e+06	2.91317e+06	5.53234e+06	5.68957e+06	5.84386e+06	5.8078e+06	6.17476e+06
KMW0186	128.12	C8H16O	1006	11.21	1002.8	Octanal	Aldehyde	C01545	--	124-13-0	93.6	499377	1.0646e+06	410280	514620	483660	469136	349399	295809	263904	269340	204832	232926	265031	210552	335108	237387	380420	226369	229427	189547	182254	187872	357252	349358	230863	228589	249847
KMW0201	110.073	C7H10O	1011	11.44	1010.25	2,4-Heptadienal, (E,E)-	Aldehyde	--	--	4313-03-5	84.79	1.45098e+06	3.09394e+06	1.22579e+06	1.42397e+06	1.63739e+06	1.6525e+06	653568	512376	658956	680006	507897	561132	331480	281622	286261	215609	474088	321967	422911	318429	245260	295422	445521	440479	494637	495499	495969
KMW0212	120.058	C8H8O	1049	12.42	1042.48	Benzeneacetaldehyde	Aldehyde	C00601	ko00360,ko01100	122-78-1	99.08	4.28826e+06	1.32418e+07	4.46673e+06	4.50421e+06	4.58869e+06	4.415e+06	3.98149e+06	2.90266e+06	3.33463e+06	3.44459e+06	2.8043e+06	2.90693e+06	4.626e+06	3.7957e+06	4.37557e+06	2.60701e+06	7.36514e+06	3.39024e+06	4.10768e+06	3.26971e+06	2.28586e+06	2.80288e+06	5.53518e+06	5.92724e+06	3.33736e+06	3.16262e+06	2.93287e+06
KMW0282	142.136	C9H18O	1104	14.3	1104.02	Nonanal	Aldehyde	--	--	124-19-6	94.55	278101	709029	250968	347145	318924	262345	208283	165199	149462	165917	128845	138551	91137.5	71173.3	127058	52932.5	141297	64903.8	118261	93424	79779.4	86269.8	161808	159222	121931	123939	138524
KMW0345	138.104	C9H14O	1154	15.71	1151.64	2,6-Nonadienal, (E,Z)-	Aldehyde	C08499	--	557-48-2	71.46	57511.6	138379	69810.5	73359.6	80651.5	69141.8	113410	85429	95838.3	107939	81817.1	87688.5	13880	12208.6	14857.8	9084.12	17898.8	9308.35	28722.4	21459	15702.8	17170.2	37555.5	33891.5	31147.8	37471.7	41461.9
KMW0399	156.151	C10H20O	1209	17.3	1205.09	Decanal	Aldehyde	--	--	112-31-2	95.63	416826	900657	373039	483760	493089	429749	194842	142233	161123	188530	134552	139961	157293	128293	170605	93427.6	183268	121850	178734	134361	111915	126769	188325	178640	149690	163853	192672
D219	136.052	C8H8O2	1251	18.66	1253.36	Benzaldehyde, 4-methoxy-	Aldehyde	C10761	--	123-11-5	86.98	54303	83822.3	84117.5	59111.9	111128	140609	1.04424e+06	671382	1.14518e+06	1.06915e+06	950394	1.05989e+06	212772	192635	158919	120200	215812	181753	285743	189856	137927	206784	349052	277348	395021	443965	395396
KMW0473	150.104	C10H14O	1293	19.6	1286.49	4-Isopropylcyclohexa-1,3-dienecarbaldehyde	Aldehyde	--	--	1197-15-5	83.06	20404.8	36664.3	25258.7	19832.4	28872.3	29701.5	101040	62620.1	86088	78457.5	76145.2	98219	38461.3	31988.6	32861.5	23180.7	40707.2	31373.6	44069.3	28393	23066.8	30315.5	53518.6	45476.5	23369.2	30869	31813.8
KMW0598	198.198	C13H26O	1503	25.39	1509.49	Tridecanal	Aldehyde	--	--	10486-19-8	94	401814	643875	379741	233474	425200	492952	147357	91437.5	160667	136577	125898	162900	121147	117511	99189.6	86967.2	112347	125486	81549.2	48963	50836.5	83122.4	118727	94746.6	80030.6	127230	117606
KMW0640	212.214	C14H28O	1613	27.81	1611.53	Tetradecanal	Aldehyde	--	--	124-25-4	93.27	442829	674658	440998	229514	502173	537894	138258	85814.9	139431	116881	110630	154199	91540.4	87886.8	73349.3	59940.3	94518.9	102098	55768.3	32088.4	32815.8	59415.8	93966.6	73468.1	87553.3	118973	109558
KMW0682	226.23	C15H30O	1711	30.1	1713.47	Pentadecanal	Aldehyde	C01948	--	2765-11-9	90.94	125105	171581	131807	51210.1	153118	139471	145758	97308	140469	115058	120262	174544	24422.1	22846.5	20893.6	15936.4	25789.7	24708.2	20290.4	10583.4	11450.7	24351.7	43468.4	34345	30032.3	45526.4	41934.8
KMW0096	102.068	C5H10O2	877	7.3	866.05	Butanoic acid, 3-methyl-	Acid	C08262	ko01110	503-74-2	84.38	7.01363e+06	1.96081e+07	8.05999e+06	7.70235e+06	8.13976e+06	8.30756e+06	1.12349e+07	8.4968e+06	1.06902e+07	1.00157e+07	8.9219e+06	9.26577e+06	1.67266e+07	1.55538e+07	1.33177e+07	1.07991e+07	2.50552e+07	1.44973e+07	1.2945e+07	9.86407e+06	7.39373e+06	8.62008e+06	1.58156e+07	1.7212e+07	1.05977e+07	1.05765e+07	1.07819e+07
KMW0101	102.068	C5H10O2	873	7.57	876.78	Butanoic acid, 2-methyl-	Acid	C18319	--	116-53-0	85.31	4.47082e+06	8.52003e+06	3.78257e+06	3.8971e+06	4.34902e+06	4.87698e+06	4.81427e+06	3.68502e+06	5.13128e+06	4.50969e+06	4.05214e+06	4.34908e+06	6.90667e+06	6.67702e+06	5.6926e+06	4.70402e+06	9.52569e+06	5.84572e+06	4.70399e+06	3.6153e+06	2.74582e+06	3.17165e+06	6.0273e+06	6.14179e+06	5.42205e+06	5.55887e+06	5.22962e+06
KMW0131	102.068	C5H10O2	911	10.74	986.98	Pentanoic acid	Acid	--	--	109-52-4	86.53	6.80414e+06	1.81455e+07	6.70951e+06	6.11575e+06	6.22126e+06	6.36854e+06	993435	615129	588439	537768	484989	576579	3.74117e+06	3.00737e+06	3.81684e+06	2.79283e+06	6.91542e+06	3.55021e+06	2.6663e+06	1.90537e+06	1.52252e+06	1.83556e+06	4.37187e+06	4.90408e+06	1.92047e+06	1.82748e+06	1.77678e+06
KMW0461	158.131	C9H18O2	1275	18.95	1263.76	Nonanoic acid	Acid	--	--	112-05-0	82.28	238765	373262	243999	135503	262915	230464	144221	78321.1	99579.9	76672.9	79787.7	106547	126647	129665	144328	100491	342799	197058	151498	72977.3	68176.6	94645	187730	226999	65196.1	81018.4	76936.9
KMW0464	144.115	C8H16O2	1279	16.22	1168.77	Octanoic acid	Acid	C06423	ko00061,ko00785,ko01100	124-07-2	81.66	644667	1.37124e+06	833455	460074	803630	716767	119697	100415	76898.7	71443.9	53457.5	89284.5	325554	304163	349130	221737	590399	284150	284420	178573	150446	210206	510639	521596	199274	195287	194530
KMW0113	114.104	C7H14O	895	7.82	886.47	2-Heptanone	Ketone	C08380	--	110-43-0	80.4	392967	733922	456599	480774	440457	478707	556060	438737	449555	426575	343157	341390	374976	320595	300404	278202	347055	280430	400664	335472	237411	271224	435163	421624	345788	325012	319106
KMW0230	126.104	C8H14O	1040	12.25	1036.74	3-Octen-2-one	Ketone	--	--	1669-44-9	71.14	213154	510267	222839	277893	249564	205730	43329.9	31339.3	30198.3	30793.2	27272.2	27545	30911.9	23962.7	34227.1	23028.1	30135.8	22284.2	46268.2	35888.3	26291.9	32221.8	56054	49492.5	56097.1	51817.4	51799.5
KMW0233	120.058	C8H8O	1041	13.09	1064.27	Acetophenone	Ketone	C07113	--	98-86-2	82.9	168524	396106	155609	188272	187050	186739	130689	97536.2	104781	106754	98335.1	89439.8	213750	183050	178116	125128	276351	180908	182258	134155	102524	118541	181717	173649	124471	118784	122362
KMW0280	124.089	C8H12O	1095	13.2	1067.88	3,5-Octadien-2-one	Ketone	--	--	38284-27-4	90.92	1.06129e+06	2.13705e+06	1.18572e+06	1.34514e+06	1.30085e+06	1.24335e+06	751893	564459	663365	679428	540322	555680	220364	186242	220263	128736	305770	186790	616992	472432	328165	371476	559855	536984	447893	459141	499443
KMW0406	170.203	C12H26	1200	17.16	1200.45	Dodecane	Alkanes	C08374	--	112-40-3	97.41	850972	1.30115e+06	673395	1.08788e+06	806636	681722	1.08236e+06	771273	1.01065e+06	1.05886e+06	713368	697758	660541	490198	692701	318635	615284	408709	768332	583596	424380	439904	723930	692550	585392	600803	718793
KMW0551	198.235	C14H30	1400	22.64	1399.76	Tetradecane	Alkanes	--	--	629-59-4	95.73	511575	776584	409928	374211	414577	480322	327771	208366	420281	400939	301506	309075	535737	505726	435134	368359	559667	687969	427226	294107	239955	308111	446786	442868	283198	331806	331200
KMW0602	212.25	C15H32	1500	25.16	1499.76	Pentadecane	Alkanes	C08388	--	629-62-9	81.56	1.40493e+06	1.83897e+06	1.45081e+06	325403	735182	1.45466e+06	479475	380268	646206	538236	540251	724173	1.63728e+06	1.64023e+06	909011	1.09259e+06	1.8776e+06	3.31575e+06	388199	255585	517428	667311	1.8153e+06	2.14524e+06	777443	975585	437235
KMW0642	226.266	C16H34	1600	27.54	1599.7	Hexadecane	Alkanes	--	--	544-76-3	94.42	149200	193956	116337	62971	117443	149395	66332.8	38529.5	69238.6	57246.4	52799.4	75684.4	154111	144643	112820	99061.7	149517	308217	78917.2	52003.8	50607.1	84953	117182	101776	63942.9	70448.4	59574.2
KMW0683	240.282	C17H36	1700	29.8	1699.54	Heptadecane	Alkanes	C01816	--	629-78-7	83.97	47513.9	77191.9	37675.3	11032.4	34710.4	44979.5	33562.6	22636	37113.6	30802	31296.5	45411	58495.4	60226.5	35070.2	34315.2	57188.3	133589	35442.1	16708	21837.6	34738.7	52176.1	50779.7	24724.2	33533.8	21354.8
KMW0633	200.214	C13H28O	1593	19.74	1291.77	n-Tridecan-1-ol	Alcohol	C14509	--	112-70-9	92.89	55829	99508.4	40025.1	63134.4	65199.5	52782.1	34926.1	24745	38056.3	41618.6	32902.5	30648.4	17950.7	13249	18093.4	6890.11	16827.3	13380.1	20022.7	15569.6	12537.9	11114.6	17170.8	15652.7	31870.2	19781.4	27226.3
KMW0025	116.084	C6H12O2	674	5.05	766.83	Methyl isovalerate	Ester	--	--	556-24-1	78.54	108810	140784	145492	145799	155381	188671	498077	433710	658008	619728	588174	608955	225828	207540	137378	119114	161941	142366	434227	355790	254408	314643	447448	431184	398662	399957	376056
KMW0106	130.099	C7H14O2	880	7.49	873.72	1-Butanol, 2-methyl-, acetate	Ester	--	--	624-41-9	62.1	38712.6	398181	203766	225222	265977	288550	399423	322957	450672	461492	407909	423293	355735	315307	121227	210855	178471	254551	271089	222733	140750	170291	292651	303732	341914	321731	352755
KMW0144	130.099	C7H14O2	1000	8.82	922.13	Hexanoic acid, methyl ester	Ester	--	--	106-70-7	92.99	409988	776179	389375	490619	456161	497158	225334	186945	201265	208802	200087	213172	129933	106072	156656	96218.9	164624	91001.7	305439	249708	195203	233608	355158	334170	396933	397800	405316
KMW0232	158.131	C9H18O2	1041	14.85	1122.57	Octanoic acid, methyl ester	Ester	--	--	111-11-5	88.92	238979	476018	242934	397192	397905	319785	212887	175736	185529	191388	160924	175429	157015	124983	198776	86220.5	154243	80728.9	213987	177520	155795	152290	232814	225160	318296	309632	313478
KMW0267	136.052	C8H8O2	1103	13.99	1093.63	Benzoic acid, methyl ester	Ester	C20645	--	93-58-3	85.72	167680	316329	122524	148342	167637	171225	147163	111191	170173	163376	118324	132187	292683	254989	196169	141114	309276	196328	161058	125965	86520.6	103875	178893	177561	140316	128953	152830
KMW0288	158.131	C9H18O2	1100	14.07	1096.29	Heptanoic acid, ethyl ester	Ester	--	--	106-30-9	75.74	319492	468363	572228	283299	287597	257064	60327.2	62208.5	66022.8	65573.4	51600.6	47446	453959	386929	447286	514531	638650	419827	166777	182604	210896	217470	281244	334023	283527	217391	227528
KMW0390	172.146	C10H20O2	1198	17	1194.83	Octanoic acid, ethyl ester	Ester	--	--	106-32-1	95.7	519844	878472	1.03748e+06	299234	401813	408866	53705.3	60404.2	70341.5	66652.1	61781	63555	786523	666211	565478	800203	1.11062e+06	782516	178367	186853	265668	264942	626968	753883	491148	347004	321656
KMW0412	172.146	C10H20O2	1224	17.77	1221.98	Nonanoic acid, methyl ester	Ester	--	--	1731-84-6	66.12	89991	149507	97060.9	124936	152859	114045	146959	103677	133527	132089	107558	130707	95201.1	81521.3	81206.7	58600.2	72390.4	43665.4	71832.4	54329.7	53517.8	61728.1	105090	98547.6	82375.1	90794.4	107338
KMW0494	186.162	C11H22O2	1324	20.55	1321.54	Decanoic acid, methyl ester	Ester	--	--	110-42-9	84.44	121312	198190	105545	161510	193439	173142	125911	90912.9	160189	151773	202964	213041	124251	109219	114531	65588.9	84709.6	66788.4	97277.6	69905.2	59173.6	68692.9	80729.8	72603.5	75851	106909	147842
KMW0599	214.193	C13H26O2	1509	25.68	1521.43	Dodecanoic acid, methyl ester	Ester	--	--	111-82-0	91.51	305595	490944	288823	247382	430883	441053	1.82292e+06	1.22771e+06	2.6589e+06	2.2339e+06	2.00703e+06	2.36765e+06	842691	851917	659828	554213	606982	704600	1.11469e+06	761203	706704	881509	1.07056e+06	895194	604958	723515	888296
KMW0654	242.225	C15H30O2	1651	30.29	1722.2	Methyl tetradecanoate	Ester	--	--	124-10-7	81.71	15413.4	20862.8	17419.7	7284.99	23318.9	18937.6	44144.9	27938.4	60299.8	45658.2	42310	66412.4	14890.2	14242.3	10925.1	10078	10052.6	12539.1	17547	11380.4	13032.8	22288.7	32138.6	22552.2	10575.6	16467.4	16429.9
KMW0262	140.12	C9H16O	1076	10.4	975.7	1-Nonen-3-one	Ketone	--	--	24415-26-7	88.86	176024	397050	180440	172898	157493	154919	143026	121323	98128.4	102709	79017.3	95784.3	27022.1	25292	33392.9	33828.2	21451.3	18862.2	13696.8	15853.9	36935.5	37307.2	29384.6	31022.3	40578.5	40852.2	37584.8
WMW0002	204.188	C15H24	1221	22.07	1378.45	.alfa.-Copaene	Terpenes	--	--	1000360-33-0	97.31	490638	726196	308743	424850	487287	480884	2.35824e+06	1.74104e+06	3.00842e+06	2.8058e+06	2.43246e+06	2.39627e+06	417361	325781	372473	242776	373997	300668	1.39405e+06	979859	932879	1.07345e+06	1.225e+06	1.12191e+06	766240	832206	988453
XMW0015	120.058	C8H8O	1079	13.64	1082.4	Benzaldehyde, 4-methyl-	Aldehyde	C06758	ko01100	104-87-0	83.95	423932	795860	441677	482766	402453	431166	205875	138036	299388	326524	141721	133403	580599	507678	387501	279224	605300	443301	416894	298064	193844	236929	436194	393654	251886	240294	265295
XMW0017	270.256	C17H34O2	1926	34.47	1923.03	Hexadecanoic acid, methyl ester	Ester	C16995	--	112-39-0	92.42	18066	23272.1	19635.7	6316.73	32075.8	18596.9	185568	142665	212703	170989	150967	254946	38091.1	32013	27718.7	23562.5	33447.3	24261.7	43503.2	26824.3	30040.4	63684.8	96837.9	77940	19220.5	45179.2	43091
XMW0026	130.099	C7H14O2	1078	13.35	1072.89	Heptanoic acid	Acid	C17714	--	111-14-8	66.87	478058	1.56762e+06	662436	520841	619674	507457	139957	82075.3	70849.9	61156	53822.5	74743.8	268771	210786	313157	168366	556802	196240	225130	150556	121198	157478	450582	444115	141720	153530	148358
WMW0049	194.167	C13H22O	1435	23.8	1445.5	5,9-Undecadien-2-one, 6,10-dimethyl-, (Z)-	Ketone	--	--	3879-26-3	75.71	27536.2	39707.1	18407.2	21387.5	25942.9	28513	35547.6	26142.8	49334.5	44271	36366.1	40727.4	30807.6	25473	25645.2	18261.3	28555.6	25768.8	41851.6	28225.8	26063.2	32730.8	37564.4	34103.5	21580.1	23973.2	26095.1
WMW0050	180.115	C11H16O2	1532	25.84	1528.24	2(4H)-Benzofuranone, 5,6,7,7a-tetrahydro-4,4,7a-trimethyl-, (R)-	Ester	--	--	17092-92-1	90.35	2.06056e+06	3.22698e+06	2.18185e+06	1.32559e+06	2.20436e+06	2.31675e+06	3.74221e+06	2.4021e+06	3.66805e+06	3.03585e+06	2.81945e+06	3.68309e+06	2.59923e+06	2.40793e+06	1.98193e+06	1.7429e+06	2.63881e+06	2.47519e+06	3.67891e+06	2.3673e+06	2.13996e+06	3.25563e+06	4.81725e+06	3.81843e+06	1.91918e+06	2.30218e+06	2.06717e+06
XMW0008	138.104	C9H14O	1124	14.79	1120.47	Isophorone	Ketone	C14743	--	78-59-1	91.82	565543	1.47218e+06	640435	673846	656931	656894	608811	452321	526425	538447	468571	484791	1.01276e+06	850666	810135	531745	1.3995e+06	745971	853333	655164	495272	566924	846716	846255	571431	516307	521648
WMW0069	132.058	C9H8O	1274	19.16	1271.02	2-Propenal, 3-phenyl-	Aldehyde	--	--	104-55-2	87.05	3174.8	5161.56	3783.26	2500.8	4579.54	4264.02	236176	110150	206010	180809	201703	252749	23060.1	19342.5	19566.9	16205.2	27219.9	17016	24028.8	18137.4	13770.6	24147.1	46246.6	36228	36313.3	64002.1	64817.1
WMW0076	190.172	C14H22	1249	18.53	1248.68	Benzene, 1,3-bis(1,1-dimethylethyl)-	Aromatics	--	--	1014-60-4	86.75	1.03362e+06	1.47785e+06	810861	1.39621e+06	977119	925145	881035	609503	1.2667e+06	1.23175e+06	668156	635604	869281	703038	708586	371878	697759	578585	990860	720441	504462	567304	807419	729937	614681	645930	758767
WMW0096	228.245	C15H32O	1778	29.64	1692.43	n-Pentadecanol	Alcohol	--	--	629-76-5	84.86	90040.2	107145	62402.5	26503.3	61594.2	76342.6	119930	76866.3	139313	107645	109950	152291	20034.5	14247.1	8865.69	7286.57	10383.5	15432.2	12683.2	7307.62	8692.29	17397	21506.3	18564.9	30482.2	33930.3	29030.2
XMW0307	106.078	C8H10	907	7.92	890.46	p-Xylene	Aromatics	C06756	ko01100	106-42-3	79.02	21038.5	50673.4	15515.6	15876.6	11071.8	12832.3	58380.3	47150.8	44494.1	43149	43320.3	43770.1	7676.71	7504.28	8949.02	7528.17	32844.1	14180	14172.4	11415.7	6556.08	8331.79	16042.9	16419.4	16227.7	14781.9	14352.3
XMW0126	134.11	C10H14	1042	11.9	1025.46	Benzene, 1-methyl-3-(1-methylethyl)-	Aromatics	--	--	535-77-3	96.73	2.62013e+06	5.83085e+06	2.46692e+06	2.96664e+06	2.85598e+06	3.00439e+06	1.04401e+06	819839	964127	956819	780395	838393	1.60492e+06	1.33827e+06	1.51313e+06	1.04994e+06	1.63018e+06	1.1151e+06	1.35772e+06	1.15258e+06	706932	774583	1.18963e+06	1.22915e+06	1.65269e+06	1.52044e+06	1.42407e+06
XMW0295	132.094	C10H12	1073	13.89	1090.33	Benzene, 1-methyl-3-(1-methylethenyl)-	Aromatics	--	--	1124-20-5	95.49	926400	2.25373e+06	893392	963158	983846	1.06023e+06	288195	210723	248673	251570	198394	223367	560030	475898	476290	308395	654123	404035	351225	282380	185253	213707	366088	358464	426247	353588	333453
XMW0099	184.219	C13H28	1121	17.53	1213.48	Decane, 2,3,5-trimethyl-	Alkanes	--	--	62238-11-3	90.34	68330	101410	66615.5	72013.3	55823.5	62197	72527.8	53738.9	73720.3	74893.2	52976	54888.6	45993.6	43300.2	50586.4	39814.4	81623.9	51762	60468.6	45170.5	41871.7	44231.4	65202	92579.1	52923.8	55212.1	68939.5
XMW0110	198.235	C14H30	1285	18.31	1241	Dodecane, 4,6-dimethyl-	Alkanes	--	--	61141-72-8	90.6	198124	266205	153781	274074	189783	169689	191235	128865	241072	228047	121601	115940	169599	132259	154456	77602	159501	118825	193300	140700	93952.9	104355	157933	143064	115188	127293	151536
XMW0133	208.146	C13H20O2	1479	23.05	1415.79	6-Methyl-6-(5-methylfuran-2-yl)heptan-2-one	Ketone	--	--	50464-95-4	62.31	15462.1	26816.7	20162.7	18306.3	19475.2	21824.3	21834.6	17362.3	31736.7	27514.8	16882	27813.7	13664	16484.2	9582.31	9919.59	19189.2	21530.4	43606.3	28473.9	23037.8	28983.5	33053.8	25358.6	13147.8	15332.7	13377
XMW0068	166.136	C11H18O	1138	15.57	1146.6	2,7-Nonadien-5-one, 4,6-dimethyl-	Ketone	--	--	74630-80-1	76.63	76992.5	246228	111834	69246.5	124596	106399	65071.8	43703.9	54755.5	56262.1	41290	53692.8	154010	132382	96240.8	84288.2	179056	93281.6	27214.3	25280.2	16951.3	21127.8	40909.1	45588.8	41185.8	47256.5	43717.3
XMW0239	184.219	C13H28	1229	18.92	1262.63	Decane, 3-ethyl-3-methyl-	Alkanes	--	--	17312-66-2	76.61	38922.5	66551.1	52554.4	25402	27534.4	38780.7	25700.4	15453.9	21216.2	19286.4	16407.8	14299.4	37531.8	38227.2	36907.5	43052.4	53926.7	53642.9	23246.5	18311	18773.9	19657.1	46593	72099.2	39663.7	35996.6	41349.3
XMW0164	194.167	C13H22O	1370	26.58	1559.34	1-Oxaspiro[4.5]dec-6-ene, 2,6,10,10-tetramethyl-	Terpenes	--	--	36431-72-8	69.15	52004.8	72986.9	42908.9	29470.7	48871	62037.7	80750.6	51540.4	95822.7	81335.1	71764.4	88494.2	27427.6	25647.6	20608.7	17023.3	27275.3	29809.3	49490.4	33150.5	32316.5	45430.6	60378.7	48599.3	32557.3	36466.3	34154.9
XMW0230	268.313	C19H40	1653	22	1375.61	Pentadecane, 2,6,10,14-tetramethyl-	Alkanes	--	--	1921-70-6	66.56	52422.5	79848.3	42225.5	43741.7	50321.3	52745.3	51818.5	36802.2	59053.6	57924	47695.3	49892.9	55219.6	45528.9	52973.1	39534.5	63331.5	55843.3	71026.7	50038.5	40674.5	48968.7	63351.4	59148.7	37759.8	39319.8	43671.1
XMW0201	98.073	C6H10O	855	6.84	848	4-Hexen-3-one	Ketone	--	--	2497-21-4	68.09	113527	341959	132813	143956	117462	109455	562348	427039	289665	299049	257151	257866	27600.6	26088.6	34946.8	29564.6	49137.7	30974.7	95336.4	72230.7	47449.1	56160.9	151858	167348	132313	124897	123499
XMW0269	186.126	C10H18O3	1190	11.31	1006.2	2-Methylbutanoic anhydride	Other	--	--	1468-39-9	73.37	297199	716081	298184	320687	302847	294119	379326	303162	394330	393502	285701	287361	188175	159057	165828	87073.3	213572	143250	267439	214676	146822	170532	212182	294242	226500	222392	207596
XMW0042	85.028	C2H3N3O	1012	14.19	1100.4	3H-1,2,4-Triazol-3-one, 1,2-dihydro-	Heterocyclic compound	--	--	930-33-6	62.46	77618.7	203923	63074.6	67270.7	79818	62158.1	121528	92890	90364.2	99067.7	86206.7	81530.6	121312	102203	103614	76317.1	199854	117442	99070.1	81204.5	58386.9	67990.3	118332	120828	67698.3	65729.4	69239.6
XMW0082	101.084	C5H11NO	1049	7.83	886.74	(R)-(-)-2-Pyrrolidinemethanol	Heterocyclic compound	--	--	68832-13-3	60.72	105451	178675	117241	123896	111191	122714	152723	131437	126360	124650	100970	104226	101325	90438.6	89855	72795.7	92954	78702.4	116837	100503	64254.6	75695.1	118879	125506	96474.5	92077.5	87692.8
XMW0174	190.099	C12H14O2	1379	24.54	1475.19	2,2'-Ethylidenebis(5-methylfuran)	Heterocyclic compound	--	--	3209-79-8	70.04	24926.3	37256.7	21661.3	20475.3	26031.1	33388.1	30368.7	20137.9	35480.2	32834.8	28186	32518.1	55444.5	49370.4	42118.1	33754.9	49931.1	57156.1	55446.5	35233.8	33213.7	39860.2	47118	35581.4	23213	25513.7	25159.8
XMW0306	144.115	C8H16O2	984	11.82	1022.79	Heptanoic acid, methyl ester	Ester	--	--	106-73-0	66.11	66160.8	137239	72686	104080	104594	87901.8	77168.9	60704.8	61845.1	64460.7	56798.1	59908.7	38125.6	30281.7	51158.1	35569.2	42463.2	27916.6	64969.1	53646.9	50107.4	48031.6	79662.8	78219.1	83046.6	80316.5	86519.4
XMW0240	142.172	C10H22	931	11.37	1008.14	3-Ethyl-3-methylheptane	Alkanes	--	--	17302-01-1	88.87	435751	453297	489715	550530	463432	518077	328813	298092	704356	587769	312798	293117	351554	288083	254184	150459	234567	248948	442132	336079	198257	226043	361367	374663	285716	296965	278575
XMW0079	166.063	C9H10O3	1439	20.09	1304.39	Ethanone, 1-(2-hydroxy-5-methoxyphenyl)-	Ketone	--	--	705-15-7	60.36	61866.7	86855.1	72983.5	65090.6	73006.3	78653.6	26691.7	18963.6	25118.1	23967.3	21605.8	26116.8	142345	118594	112319	82012.7	163725	113748	107954	77592.8	61260.1	74788.7	124570	107552	67052.1	61632.3	60518.3
XMW0176	204.188	C15H24	1440	21.93	1373	[1α,4aα,8aα]-1,2,4a,5,6,8a-hexahydro-4-7-dimethyl-1-[1-methylethyl]naphthalene	Terpenes	--	--	31983-22-9	92.6	225959	322589	130125	187925	207436	217868	1.49877e+06	1.11626e+06	2.05781e+06	1.91292e+06	1.70018e+06	1.64392e+06	166428	137591	140266	97501.8	144191	127469	590087	412340	413505	486248	518271	475379	447309	463478	547950
XMW0136	200.157	C15H20	1542	26.69	1563.94	4-Isopropyl-6-methyl-1-methylene-1,2,3,4-tetrahydronaphthalene	Terpenes	--	--	50277-34-4	82.54	24238.1	29203.5	19685.7	12679.2	21810.6	22121.9	295635	197432	303149	259787	237417	320270	31823.9	31513.7	25307.7	23315.4	33226	35811.4	124050	79007.4	74022.8	111089	175767	143333	75326.7	84052.2	73213.3
XMW0139	198.141	C15H18	1706	29.23	1674.29	6-Isopropyl-1,4-dimethylnaphthalene	Terpenes	--	--	489-77-0	75.73	57122.8	81508.8	47546.1	31424.3	48796.1	57489.7	285737	186411	306370	257160	230197	271084	79669.8	73496.6	57508.5	52500.9	76367.7	89264.3	160998	106729	96331.8	133912	183119	152831	121413	112796	102127
XMW0192	136.125	C10H16	919	11.67	1017.99	(+)-4-Carene	Terpenes	--	--	29050-33-7	95.18	610953	1.14157e+06	716829	767986	729203	720592	635982	529143	642411	623626	512080	579458	632230	510017	691266	375071	522837	417535	1.01322e+06	832661	465969	564915	834990	825531	631721	635122	608516
XMW0142	204.188	C15H24	1446	21.8	1368.02	3a,7-Methano-3aH-cyclopentacyclooctene, 1,4,5,6,7,8,9,9a-octahydro-1,1,7-trimethyl-, [3aR-(3a.alpha.,7.alpha.,9a.beta.)]-	Terpenes	--	--	469-92-1	82.63	32115.2	48997.2	17312.3	25496.6	29781.5	34576.1	32123	23728.8	49552.3	42831.3	32833.8	33136.5	48487.9	39469.1	39683.3	27068.7	42735.2	36834.9	61922	44523	36778.5	40037.2	45133.9	41628.9	31617.3	27835.4	33519.6
XMW0143	204.188	C15H24	1403	23.16	1420.38	1H-3a,7-Methanoazulene, 2,3,4,7,8,8a-hexahydro-3,6,8,8-tetramethyl-, [3R-(3.alpha.,3a.beta.,7.beta.,8a.alpha.)]-	Terpenes	C09630	--	469-61-4	91.83	485332	727974	327406	395880	556244	602796	3.89039e+06	2.76151e+06	4.93454e+06	4.49172e+06	3.98552e+06	4.01658e+06	1.72381e+06	1.44728e+06	1.38808e+06	1.02325e+06	1.57684e+06	1.38529e+06	2.94076e+06	2.06069e+06	1.96699e+06	2.29701e+06	2.75668e+06	2.534e+06	1.6765e+06	1.68948e+06	1.90786e+06
XMW0227	202.172	C15H22	1595	23.12	1418.62	aR-Himachalene	Terpenes	--	--	19419-67-1	82.16	212727	292162	128126	158659	221361	243522	381787	268808	530252	473782	421003	425013	339148	289516	312478	233296	337253	328956	520451	362534	327834	404072	428514	389158	247303	269327	295782
XMW0271	202.172	C15H22	1589	22.79	1405.47	Cadina-1(10),6,8-triene	Terpenes	--	--	1460-96-4	65.05	110981	155269	73139.5	76700.1	100903	121173	305585	210827	380505	335758	296850	324266	231341	209148	207446	167891	240167	245117	321682	227076	203749	267961	311712	280530	181034	188324	193146
WMW0227	145.969	C6H4Cl2	1021	11.57	1014.62	Benzene, 1,4-dichloro-	Aromatics	--	--	106-46-7	88.14	978494	1.52337e+06	916916	1.33255e+06	1.23414e+06	1.07149e+06	34749.1	27898.3	24697.2	24218.5	20399.5	20142.6	4676.85	3626.82	4873.42	2168.39	5470.55	2859.13	13241.4	10201.5	7765.56	9363.79	11295.7	10742.7	167912	157724	163492
XMW0360	112.052	C6H8O2	958	12.02	1029.2	(E)-4-Oxohex-2-enal	Aldehyde	--	--	1000374-04-2	63.08	223392	679124	221423	195650	203349	201735	87812	60014.6	57511.3	61450.3	52111.7	57827.1	81227.1	77743.5	77682.9	55779.3	150141	84618.8	119625	85408.2	66426.5	77644.4	157638	173610	81138.3	76642.9	77228
XMW0379	204.188	C15H24	1407	23.25	1423.84	Bicyclo[5.2.0]nonane, 2-methylene-4,8,8-trimethyl-4-vinyl-	Terpenes	--	--	242794-76-9	98.08	2.35611e+06	3.66018e+06	1.48982e+06	1.78342e+06	2.28993e+06	2.46955e+06	2.93885e+06	2.13725e+06	3.94634e+06	3.58408e+06	3.06494e+06	3.07963e+06	3.95004e+06	3.32327e+06	3.08214e+06	2.34122e+06	3.64316e+06	3.10211e+06	4.81455e+06	3.53619e+06	2.97628e+06	3.58109e+06	4.17009e+06	3.98137e+06	2.41154e+06	2.55768e+06	2.78558e+06
XMW0383	204.188	C15H24	1472	24.14	1459.02	1,4,7,-Cycloundecatriene, 1,5,9,9-tetramethyl-, Z,Z,Z-	Alkanes	--	--	1000062-61-9	93.92	364645	574577	215396	248444	338846	378109	553569	358890	738413	639438	514333	547379	642695	525392	487401	380523	576718	521820	795422	573591	530184	654281	787026	724051	381938	414266	460987
XMW0391	202.172	C15H22	1484	26.61	1560.68	3,5,11-Eudesmatriene	Terpenes	--	--	193615-07-5	65.59	23057.8	31625.8	16719.7	10610.5	21299.9	24150.4	121859	77877.9	136048	116073	109362	136025	54691.3	49843.2	48131.9	39792	62617.9	64222	105918	69567.2	65451.2	101572	137702	122344	50060.5	58603.3	55077.8
XMW0392	200.157	C15H20	1599	27.95	1617.78	.alpha.-Corocalene	Terpenes	--	--	20129-39-9	81.7	14769.6	21431	11574.5	8850.28	12777.7	15361.7	97949.4	62427.6	107085	88126.4	80135.9	95629.4	22096.6	21697.6	16198.5	13980.5	22308.2	23467.1	46490.6	31472.8	29171.9	38935.7	52891.9	46073.9	32088.2	32401.9	31623.8
XMW0411	128.12	C8H16O	1112	14.47	1109.7	Cyclohexanol, 2,6-dimethyl-	Alcohol	--	--	5337-72-4	84.77	366629	943261	378837	383166	387642	382127	376863	283797	372977	374568	317612	341352	643985	562464	545383	383084	927031	508069	874294	690878	510934	628175	923110	988235	483468	455539	438531
XMW0420	184.219	C13H28	1233	21.69	1364.2	Undecane, 2,9-dimethyl-	Alkanes	--	--	17301-26-7	80.86	9038.58	15408.9	16032.3	12635.6	7766.7	10929.7	11080	8379.61	9472.43	9890.55	10709.4	9430.62	17403.9	15438.4	16128.9	15393.3	20830.7	22424.7	5545.02	4589.9	4646.47	6383.65	15426.9	17459.4	9325.64	11096.2	10316.4
XMW0437	136.125	C10H16	1103	12.05	1030.25	1,5-Cyclooctadiene, 1,6-dimethyl-	Olefin	--	--	3760-13-2	73.73	91040.7	159445	81676.1	101387	94935.7	96782.6	174114	134836	145592	150441	127157	137737	869763	704914	957575	381547	753365	620402	143164	110720	79298	86785.1	103985	100615	272835	269960	260359
XMW0455	138.068	C8H10O2	1348	16.76	1186.88	1,3-Benzenediol, 4,5-dimethyl-	Aromatics	--	--	527-55-9	74.74	9058.04	18897.9	10323	9727.87	11884.8	11253.4	96592.5	61569.5	85828.4	77424.6	75289.6	88196.3	12602.9	8792.61	10753.8	6699.94	12092.4	9207.22	17006.4	11715	9409.52	12037.5	19439.7	15776.7	17146.8	18637.8	17850.2
XMW0484	110.073	C7H10O	841	10.98	995.33	Furan, 2-propyl-	Heterocyclic compound	--	--	4229-91-8	73.31	393907	1.03584e+06	390358	472708	437446	445899	416748	257496	296913	282638	238106	205196	63037.4	52686.9	67317.6	52999.1	105041	56915.7	121002	97838.5	52153.3	62426	168564	165625	178008	174850	164830
XMW0489	152.12	C10H16O	1120	16.31	1171.65	p-Mentha-1(7),2-dien-8-ol	Terpenes	--	--	65293-09-6	77.62	119178	314544	139392	119252	138093	143305	28275.4	22337.7	30514.8	28091.1	23738.3	27336.6	67688.5	52618.2	57610.8	33240.9	75467.2	49833.8	24043	17066.5	12401	16081.7	35479.8	39956.1	29871	28926.3	27370.1
XMW0501	152.095	C8H12N2O	1229	15.88	1157.08	Ethanone, 1-(1-ethyl-3-methyl-1H-pyrazol-4-yl)-	Ketone	--	--	1000302-80-6	62.62	37343.5	87382.8	39912.4	43751.2	48953.2	48498.1	79228	61252.8	63860.4	65670.6	55770	68765.1	111802	94682.6	111394	62509.8	148745	86618.1	73660	51591.3	36350.7	41155.5	77750.8	77104.7	53685.7	55314.5	55383.7
XMW0502	184.219	C13H28	1185	13	1061.43	Undecane, 3,8-dimethyl-	Alkanes	--	--	17301-30-3	88.81	40766.4	72033.1	38320.3	46017.8	37516	35063.4	31769.8	24583	39322.6	41216.6	24494.9	22349.1	25029.5	20767	22923.8	13886.5	24633	21609.7	31295.7	25457.1	18429.9	19176.1	29494.2	32134.5	28321.9	30579.1	32151.3
XMW0503	154.063	C8H10O3	1359	15.55	1146.04	2-Acetyl-1,3-cyclohexanedione	Ketone	--	--	4056-73-9	69.21	33575	93581.7	38098	38522.9	44715.4	38053.3	284301	211128	224545	232826	196602	209118	66770.6	57728.7	55263.5	31329.1	93609.4	47692.2	93542.6	69530.1	52031.1	59737.9	113577	116225	86179.8	79062.9	78996.6
XMW0507	180.115	C11H16O2	1632	25.53	1515.21	1,3-Benzenediol, 5-pentyl-	Phenol	--	--	500-66-3	72.34	215198	306296	218769	127485	233846	270167	96673.2	58556.3	86389.1	67140.7	68074.8	119866	153439	140179	130798	117095	122380	140897	161317	97400.4	105298	171728	233005	179587	106576	122617	97212
XMW0534	150.104	C10H14O	1119	17.36	1207.43	Bicyclo[3.1.1]hept-3-en-2-one, 4,6,6-trimethyl-, (1S)-	Terpenes	--	--	1196-01-6	93.41	74477.1	174095	84318.9	84362	86474.1	93359.6	88322.4	64055.3	87535.6	85103.5	71528	77827.6	275452	245163	231476	171097	366326	237883	308959	231544	176514	212978	255803	241992	147816	135477	141008
XMW0538	146.084	C9H10N2	1269	18.89	1261.37	1,2-Dimethylbenzimidazole	Heterocyclic compound	--	--	2876-08-6	64.77	4312.06	8783.07	4196.85	4983.84	5440.58	5308.71	279690	206701	294357	290480	241866	243943	15127.4	12710.3	14214.3	8668.88	13838.4	11003.5	3353.45	3212.33	1675.73	2613.87	2965.43	2867.52	43863.2	46429.7	54972.7
XMW0541	152.12	C10H16O	1130	18.68	1253.95	3-Cyclohexen-1-one, 2-isopropyl-5-methyl-	Terpenes	--	--	1000155-47-0	82.05	1913.04	3968.19	1600.17	2500.75	1635.89	1907.4	4542.38	3170.92	5311.72	4339.79	4282.7	4517.15	337938	283404	274722	198099	402715	282717	9896.73	107808	79654.1	101598	148027	150014	49848.2	45444.5	51354.3
XMW0633	172.074	C8H12O4	1204	13.23	1068.76	Ethyl 4-(ethyloxy)-2-oxobut-3-enoate	Ester	--	--	1000305-38-2	76.94	104711	355909	110011	114063	105254	104033	72694.1	49620.4	53043.5	53942.6	46762.2	49319	64341.1	63160	60330.5	46475	111410	51324.9	108257	87225.9	69044.8	76509.7	140260	151327	77156	70126.8	72069.3
XMW0649	156.188	C11H24	1018	11.5	1012.37	Nonane, 2,6-dimethyl-	Alkanes	--	--	17302-28-2	90.51	544923	696760	562352	641489	549267	593623	438935	389189	708701	694535	395663	395477	396938	317166	279942	213571	319863	278161	511589	393763	232868	269548	445334	375996	330142	354836	336548
XMW0662	142.078	C11H10	1298	19.87	1296.04	Naphthalene, 2-methyl-	Aromatics	--	--	91-57-6	96.5	19536.1	31326.8	15914.1	18066.4	20097	22131.4	3.47688e+06	2.40088e+06	4.36299e+06	3.84696e+06	3.51032e+06	3.8274e+06	95439.2	81082.2	83660	56764.3	88760.1	80704	25271.3	17105.3	12611.3	17014	22694.4	19601.6	429785	591188	665214
XMW0665	220.183	C15H24O	1635	28.18	1627.96	Muurola-4,10(14)-dien-1.beta.-ol	Terpenes	--	--	257293-90-6	90.41	16618.5	22472.6	14755.9	8242.22	14830.9	18078.8	368214	240964	379938	324627	301494	397665	28907.1	27787.3	22851.8	18557.7	26678.5	35236.6	143217	90679.5	85417.4	140222	206808	176315	93534.6	101521	92375.9
XMW0692	226.266	C16H34	1294	24.52	1474.07	Nonane, 2,2,4,4,6,8,8-heptamethyl-	Alkanes	--	--	4390-04-9	70.09	42613.4	61340.9	36373.7	31705	29903	34011.8	29653.2	13913	42032.7	38468.6	22358.8	24877.8	37750.3	31819	29497.2	20926.5	34222.1	34054.7	30474.9	24232.8	18345.1	22693.6	35815.8	35814	18635.6	23088.4	23625.6
XMW0711	121.053	C7H7NO	1181	17.59	1215.63	Formamide, N-phenyl-	Aromatics	--	--	103-70-8	90.7	411971	783790	424643	335363	463696	565791	547564	407508	637319	528177	461531	740146	995603	923703	750712	615996	1.16872e+06	933189	905796	606088	500992	734647	1.0713e+06	914406	462149	609714	514855
XMW0714	109.053	C6H7NO	1035	12.95	1059.85	3-Acetyl-1H-pyrroline	Heterocyclic compound	--	--	1072-82-8	82.11	127095	230259	118056	143527	155151	152211	116130	92322	114982	110935	91508	104597	907037	803424	766630	556988	1.07345e+06	728087	230739	173941	114864	139115	214333	196685	200976	225756	217259
XMW0715	137.084	C8H11NO	1281	15.13	1131.99	Benzenamine, 4-ethoxy-	Amine	--	--	156-43-4	64.6	3854.37	7867.92	4596.98	6028.64	6314.63	6885.04	16427.7	14682.9	15071.1	16968.4	14492.5	15925.1	3398.16	2007.09	2155.9	1851.66	2645.37	2417.09	2567.05	1448.01	1345.57	1480.97	3743.9	3141.39	4987.05	5657.27	5810.04
XMW0731	148.125	C11H16	1246	19.36	1278.29	Benzene, pentamethyl-	Aromatics	--	--	700-12-9	87	3851.74	9515.71	3338.77	4262.58	4382.12	4292.9	932674	673533	1.04262e+06	984088	832787	846901	29363.4	25476.8	28926.4	18351.6	26591.2	23035.9	4203.9	2919.61	2318.05	2582.15	3739.44	3140.1	136747	148790	174132
XMW0734	152.047	C8H8O3	1470	19.18	1271.84	Ethanone, 1-(2,4-dihydroxyphenyl)-	Ketone	--	--	89-84-9	66.46	8035.34	14827.3	6976.7	6232.36	8858.57	9552.07	60803.4	36051.4	55809.2	50206.5	47554.4	57364.1	3310.61	3701.57	2647.38	1851.11	4173.43	3168.65	5523.8	3764.93	3043.34	4262.6	7304.98	7227.96	8344.65	10402	9929.04
NMW0005	154.136	C10H18O	1182	16.61	1181.61	3-Cyclohexen-1-ol, 4-methyl-1-(1-methylethyl)-, (R)-	Terpenes	C17073	--	20126-76-5	92.84	443837	1.23563e+06	440811	465821	497790	488597	420609	328576	418849	422677	336221	386947	691156	581291	612860	382340	824609	477551	645152	495749	315177	388008	689967	762791	460273	414794	390759
NMW0014	100.016	C4H4O3	1023	9.54	946.55	Succinic anhydride	Other	C19524	--	108-30-5	66.69	163968	342316	126075	115519	114537	116876	41118.3	28820	28852.4	31769.3	28091.2	31387.9	81878.8	64139.4	72124.8	56257.4	123728	78753.6	61999.7	49298.5	35633.9	41526.9	76618.2	88287.5	55473.3	48102.2	45876.7
NMW0050	117.058	C8H7N	1144	15.24	1135.62	Benzyl nitrile	Nitrogen compounds	C16074	ko00460,ko01100,ko01110	140-29-4	69.6	25959.4	56406.8	23749.3	20920.1	19685.2	18667.3	24067.4	12149.9	10784.7	13358.1	10400	10648.1	70657.4	65082.5	61374.1	45446.4	105155	70045.6	48634.1	33459.7	26572.6	31650.6	46296.1	48185.9	24446.2	25235.3	26058
NMW0084	152.12	C10H16O	1213	17.08	1197.62	(-)-Myrtenol	Terpenes	C11938	ko00903	19894-97-4	91.83	113808	262523	155706	148247	173733	189430	1.37732e+06	1.01883e+06	1.16183e+06	1.20035e+06	1.07675e+06	1.30881e+06	290528	247439	281533	189114	341659	214595	310322	237933	174277	220710	504256	511013	366626	419462	414394
NMW0103	113.084	C6H11NO	1259	18.51	1248.01	Caprolactam	Amine	C06593	ko01100	105-60-2	72.54	61802.1	90834	44108.2	45018.6	67500.4	51913.6	64697	52416.8	65715.9	67700.2	44355	56702.8	56871.2	53064.3	41822.5	27877.9	109767	53174.8	68748.4	27699.8	24210.4	38000.6	65952.4	101664	45830	38791.6	30566
NMW0175	164.12	C11H16O	1400	26.37	1550.39	Phenol, 4-(1,1-dimethylpropyl)-	Phenol	C14226	--	80-46-6	66.11	15133.7	21985.4	10484.4	7850.66	12181.7	17249.5	10263.3	6429.41	9800.15	8622.21	8292.86	8802.19	6348.1	7315.61	5002.52	6568.65	7225.23	9962.41	12651	7779.37	7050.05	9934.69	11272.8	11733.2	7406.8	6753.3	7793.97
NMW0178	182.094	C10H14O3	1407	22.47	1393.23	Benzene, 1,2,3-trimethoxy-5-methyl-	Aromatics	C17822	--	6443-69-2	89.11	50228.9	90307.8	51858.3	35700.3	55615.2	65816.5	111973	68190.9	117987	101195	92880.8	117814	423052	395361	338399	286539	479487	437162	242103	159176	150762	216268	196447	152840	125691	142595	140106
NMW0198	156.094	C12H12	1452	23.65	1439.73	Naphthalene, 1,2-dimethyl-	Aromatics	C14329	--	573-98-8	70.87	4028.85	6399.52	3718.8	2884.1	4402.27	4620.97	213181	137523	256002	215073	202363	240294	10660.3	8830.58	8811.18	6826.94	11595.4	10448.1	4164.52	2608.55	2333.88	3220.35	4246.83	3835.11	25109.9	33539.5	35054.8
NMW0207	156.094	C12H12	1472	23.14	1419.5	Naphthalene, 1,8-dimethyl-	Aromatics	C14703	--	569-41-5	75.82	7984.11	11984	6734.07	6387.11	8248.7	9584.85	558104	364879	687170	581050	534903	634973	23144.2	19627.8	18112.7	14093.5	24090	21277.7	9650.17	6553.82	6888.87	7470.95	8510.49	8011.55	78795.9	101540	101819
NMW0287	232.219	C17H28	1664	29.04	1665.64	1,8,11,14-Heptadecatetraene, (Z,Z,Z)-	Olefin	C17535	--	10482-53-8	97.59	533564	675717	468689	245060	468771	571513	688330	451873	865937	726874	684683	925827	150851	133593	115005	93712.3	130917	185578	171171	98493.7	102494	185804	227415	198551	179859	260793	236015
NMW0297	240.245	C16H32O	1692	29.15	1670.67	Oxirane, tetradecyl-	Alkanes	C14499	--	7320-37-8	73.31	82257.1	99841.2	62703	39391	86706.7	89301.5	180120	110696	175085	177962	159726	231938	47507	43762.6	33235.1	29506.3	37142.6	44401.1	87136.2	57450.7	60192.1	100132	122984	111983	58944.2	65618.8	53864.7
NMW0780	100.052	C5H8O2	928	8.7	918.24	2-Butenoic acid, 2-methyl-	Acid	C08279	--	13201-46-2	72.54	63418.2	134960	77091.4	78609.9	78997.7	85695.4	48884.5	35401.1	34928.7	31893.9	29723.4	33589.9	186144	156429	174789	144079	317244	177375	106635	85715.1	66992.7	77841.6	179699	199666	77664.7	77608.3	72077.2
w07	142.078	C11H10	1315	19.78	1293.06	1H-Indene, 1-ethylidene-	Alkanes	--	--	2471-83-2	69.31	46461.3	65470.7	38503.4	45210.3	63083	72115.4	10573.4	7296.55	15440.4	9567.54	2.96662e+06	3.19084e+06	21896.6	20753.9	21430.8	14426.6	21601.9	21114.1	53099.8	34283.5	28898.7	38336.9	39554	33827.6	24863	23980	29887.5
w38	204.188	C15H24	1421	23.38	1428.98	1H-3a,7-Methanoazulene, octahydro-3,8,8-trimethyl-6-methylene-, [3R-(3.alpha.,3a.beta.,7.beta.,8a.alpha.)]-	Terpenes	--	--	546-28-1	95.57	414578	628186	290180	343903	474467	504670	2.62357e+06	1.92907e+06	3.34308e+06	3.0123e+06	2.68069e+06	2.71927e+06	1.25457e+06	1.07629e+06	992626	743560	1.18383e+06	1.00767e+06	2.2925e+06	1.63249e+06	1.5234e+06	1.86496e+06	2.19919e+06	2.04698e+06	1.19991e+06	1.26062e+06	1.40873e+06
w45	196.219	C14H28	1421	27.36	1592.05	2-Tetradecene, (E)-	Olefin	--	--	35953-54-9	81.37	46625.2	55220	29659	17517.5	31234.6	41513.2	42034.9	25951.9	54212	45760.7	43251.9	56291.2	13582.6	13383.5	9103.05	7701.32	11976.8	20840.3	16579.1	10983.6	11747.7	18265.9	20409	17388.9	15293.9	18272.2	16811.6
D69	168.079	C9H12O3	1447	20.88	1333.68	3,5-Dimethoxy-4-hydroxytoluene	Aromatics	--	--	6638-05-7	84.2	65300.6	99610.1	83064.7	50654	99921.4	112015	160590	88652.7	123162	112005	113022	154762	86123.1	79464.7	69684.2	58428.2	83289.5	69701.1	50686.9	31492.4	33370.1	42776.2	70742.9	53196.4	76831.7	90687.7	81613.7
D79	150.068	C9H10O2	1305	17.11	1198.63	Benzaldehyde, 4-ethoxy-	Aldehyde	--	--	10031-82-0	67.65	23488.5	51441.7	27620.8	30938.3	30277.8	31937.4	104194	78800.5	93790.6	94301.1	95816	112683	57471.4	55632.9	43435.8	32963.9	62657.4	43176.2	57114.7	43042.3	29800	35798.2	66146.1	66398.1	43179.3	45061.1	48419.7
D111	146.073	C10H10O	1309	22.36	1389.12	2-Propenal, 2-methyl-3-phenyl-	Aldehyde	--	--	101-39-3	72.26	18057.6	28099.4	25885.3	12971.1	28051.9	25518.2	803699	414613	513995	493659	434609	580781	71434.3	56498.8	70348.7	44089.8	65543.9	53652.8	132328	80509.9	75486.2	114060	432985	348679	89293.6	141586	128887
D112	150.068	C9H10O2	1178	16.37	1173.67	Benzeneacetic acid, methyl ester	Ester	--	--	101-41-7	79.9	41478.1	96270	48867.4	56602.2	63844	66689.5	144889	106479	184109	167666	145459	176190	173768	145870	144808	91083.3	192353	108338	128458	104314	87047.6	109668	181123	196671	110357	136725	136089
D229	142.099	C8H14O2	915	9.19	934.59	Allyl isovalerate	Ester	C19318	--	2835-39-4	84.6	161933	280995	164767	191895	201428	206200	154744	128720	164646	153240	118631	120497	150006	143877	147639	130106	143322	122233	285612	221224	151447	164735	251396	252361	157413	158337	144143
XMW0810	204.188	C15H24	1387	23.96	1452.19	(-)-delta.-Panasinsine	Terpenes	--	--	1000156-11-8	62.03	18023.4	35566.6	10576	19241.3	20380.3	19947.5	26068.3	19963.5	35741.2	31494.8	28600	32840.2	51433	35328.9	43712.6	31541.4	33948.6	38060.1	47964	30653.7	27456	32645.7	53396	32638.3	25154.9	22696.1	24109.6
XMW0826	134.048	C7H6N2O	1139	14.42	1108.21	3-Methylisoxazolo[4,5-b]pyridine	Heterocyclic compound	--	--	83988-39-0	62.44	35643.2	71318.8	41018	37528.8	43968.8	48192.3	517352	361815	519996	490919	412637	427222	95001.7	82608.3	75554.1	52633.8	113790	80598.9	683828	473142	358595	439415	748344	687996	253664	252518	267594
XMW0852	261.061	C11H10F3NO3	1548	25.72	1523.04	l-Alanine, N-(2,3,4-trifluorobenzoyl)-, methyl ester	Ester	--	--	1000299-62-7	80.13	119182	189265	96923.8	84555.5	103403	124914	409191	263226	473238	393715	347583	394944	178488	156253	140665	114513	172766	179197	221631	148604	146218	192081	251941	215233	168897	165494	160205
XMW0888	144.115	C8H16O2	946	9.6	948.71	Butanoic acid, 3-methyl-, propyl ester	Ester	--	--	557-00-6	90.76	288970	569316	275795	309672	322317	327379	210201	176426	204577	202758	172710	180937	229962	209263	227047	203307	253740	196703	341967	263095	189514	205054	272130	280170	222251	225031	214513
XMW0889	134.11	C10H14	956	9.77	954.2	Bicyclo[3.1.0]hex-2-ene, 4-methylene-1-(1-methylethyl)-	Terpenes	--	--	36262-09-6	86.09	1.87382e+06	4.51415e+06	1.87135e+06	1.93617e+06	2.06751e+06	2.3869e+06	382095	306501	389785	385066	325618	365452	911107	802698	639546	601323	948616	710508	326999	263092	164332	205540	348102	374375	584954	538839	502637
XMW0900	138.104	C9H14O	1044	12.38	1041.22	3-Cyclohexen-1-one, 3,5,5-trimethyl-	Ketone	--	--	471-01-2	72.52	21754.4	49028.7	24071.7	27037.7	27327.9	26814.1	53814.5	42056.4	48552.6	46519.6	42885.7	48564.4	17839.8	15224.7	15457.7	10373.9	22531.4	13673.5	25042.1	18281	14661.5	18070.6	28145.6	26776.3	20594.4	22713.8	24231.9
XMW0914	110.048	C5H6N2O	1156	11.43	1010.13	Ethanone, 1-(1H-pyrazol-4-yl)-	Ketone	--	--	25016-16-4	69.19	310980	661118	268700	310377	355202	355182	139809	108745	140620	144243	121257	122675	71910.7	60900.4	61645.7	50897.5	102025	67815.6	94133.6	71557.8	53494.2	65327.3	100096	98662.2	107320	108541	138779
XMW0925	150.104	C10H14O	1149	12.68	1051.04	Camphenone, 6-	Ketone	--	--	55659-42-2	73.8	28657.8	56327.3	28506.9	34441	33332.7	37034.4	94779.3	62893.5	79240	77228	63640.9	72704.1	18272.3	14273.9	14981	8943.16	21688.3	13269.8	17322.5	12758.2	10137.3	11428	21834.7	21392.2	25753	25608.4	23594.5
XMW0927	152.084	C9H12O2	1144	15.46	1143.17	2,6,6-Trimethyl-2-cyclohexene-1,4-dione	Ketone	--	--	1125-21-9	94.91	245106	754008	294348	296647	281487	272625	169414	121498	139140	147843	117796	122823	290563	245593	243694	154704	433921	204411	256927	204865	149122	169630	337191	355512	190043	167772	163898
XMW0964	204.188	C15H24	1402	22.67	1400.68	Petasitene	Terpenes	--	--	443124-67-2	75.29	27665.3	40214.2	21864.3	29356	28666.4	30708.5	112628	79456.8	148075	135440	123691	116690	49031.4	42299.8	39129.8	28119.8	41183.3	38009.4	98524.5	71087.3	65902	78567.5	86547	75959.2	50578.8	50687.6	60852.6
XMW0968	150.104	C10H14O	1314	17.74	1220.78	4,7,7-Trimethylbicyclo[4.1.0]hept-3-en-2-one	Ketone	--	--	81800-50-2	91.76	475577	1.05284e+06	561037	536867	543269	567465	924411	638469	893535	858704	738722	757285	2.61566e+06	2.27594e+06	2.12512e+06	1.54395e+06	3.23223e+06	2.0911e+06	1.96412e+06	1.44229e+06	1.07232e+06	1.24979e+06	1.93859e+06	1.79071e+06	1.09119e+06	1.00178e+06	1.03415e+06
XMW0985	204.188	C15H24	1494	25.37	1508.53	2-Isopropenyl-4a,8-dimethyl-1,2,3,4,4a,5,6,8a-octahydronaphthalene	Terpenes	--	--	1000193-57-0	82.2	44875.9	70199.4	31843.8	29451.3	43700	45858.6	75265.1	50098.7	92467.9	83915.8	74316.1	82073.7	58889	49758.8	52228.9	39772.5	57920.9	55773.2	82743.8	54928.9	50089.2	65497.1	81713	76547.5	40213.3	47131.8	47100.3
XMW0999	220.183	C15H24O	1589	26.57	1558.7	Isoaromadendrene epoxide	Heterocyclic compound	--	--	1000159-36-6	85.97	22911.4	31140.7	16719.7	10138.1	20475.3	24463.1	120780	77875.6	135095	116140	109500	136583	54625.6	50163.9	48174.8	39981.4	62043.4	63667	106227	69618.2	65414.3	99782.7	136219	122684	42663	58616.1	55071.3
XMW1009	220.183	C15H24O	1551	26.44	1553.19	Diepicedrene-1-oxide	Heterocyclic compound	--	--	1000156-11-0	89.54	146380	193153	110148	79852.1	130151	172988	193768	123529	235081	196782	173535	206341	95992.6	90101.7	72761.3	60891.2	93124.6	109464	175105	116567	112913	159868	209476	177867	98838.4	110398	103646
XMW1088	150.068	C9H10O2	1363	17.51	1212.68	4-Hydroxy-2-methylacetophenone	Ketone	--	--	875-59-2	65.2	17783.4	36562.2	21495.8	19168.1	23079.2	23872.5	39504	24637.5	36804.3	34068.8	32279.8	39974.5	62332.2	55158.4	50937.4	35002.9	74658.8	46032.7	40076.9	28519.3	20969.8	25177	42698.7	37954.1	23412.4	24630.5	27079.5
XMW1123	134.11	C10H14	1074	11.31	1006.04	Benzene, 2-ethyl-1,4-dimethyl-	Aromatics	--	--	1758-88-9	82.68	488048	1.2806e+06	502593	511583	552175	628693	115459	90246.1	113620	114546	95827.3	109562	296047	251218	218239	205902	320064	264801	90465.1	74606.6	48462.2	61508.1	101351	115404	156471	152789	142607
XMW1125	168.188	C12H24	1158	12.87	1057.27	4-Undecene, 3-methyl-, (Z)-	Olefin	--	--	74645-87-7	77.22	140054	363965	139014	178813	167780	136593	130028	102225	93020.9	103945	79031.4	84926.4	46885.3	36184.8	53448.8	28523.9	57584.9	28081.2	50412.9	39136.7	28825.4	32490.8	64074.7	62221	62513.4	62868.4	64153.8
XMW1144	192.079	C11H12O3	1452	17.74	1220.79	4-Acetoxy-3-methoxystyrene	Aromatics	--	--	46316-15-8	70.97	473134	1.04853e+06	559737	534053	540247	566621	921452	639256	883455	852968	736614	757340	2.60725e+06	2.27654e+06	2.12394e+06	1.53229e+06	3.23e+06	2.0913e+06	1.95638e+06	1.44139e+06	1.07241e+06	1.2403e+06	1.93415e+06	1.78731e+06	1.08887e+06	1.00169e+06	1.03327e+06
XMW1172	164.047	C9H8O3	1378	16.81	1188.66	3,6-Dimethyl-4H-furo[3,2-c]pyran-4-one	Ketone/Heterocyclic Compound	--	--	36745-38-7	62.15	10975	19635.5	9398.62	8357.04	10626.7	12427	14067.9	10249.9	14488.7	12981.7	11903.9	12621	22654.4	20638.9	18552.9	15382.7	26094.7	22347.4	19190.5	13361.1	11847.9	15724	22069.1	19027.3	12209.3	12654.4	12661.7
XMW1177	220.183	C15H24O	1646	28.48	1641	11,11-Dimethyl-4,8-dimethylenebicyclo[7.2.0]undecan-3-ol	Alcohol	--	--	79580-01-1	96.98	693322	965652	572780	338987	666346	818762	673390	436166	784238	649621	596080	747818	438169	412983	355065	305155	448831	529437	769401	495051	492871	766947	1.03125e+06	881771	327010	467749	431549
XMW1184	232.146	C15H20O2	1832	32.55	1828.6	Butanoic acid, 3-methyl-, 8-decene-4,6-diynyl ester, (Z)-	Ester	--	--	126693-81-0	98.83	834507	961968	723588	283407	870413	809778	1.92311e+06	1.37291e+06	2.05263e+06	1.70988e+06	1.58475e+06	2.09996e+06	1.30329e+06	1.23377e+06	983162	855481	1.25967e+06	1.73319e+06	2.4921e+06	1.56473e+06	1.39777e+06	2.45367e+06	3.49884e+06	3.10809e+06	705155	1.29013e+06	1.10088e+06
XMW1218	172.146	C10H20O2	1093	13.87	1089.72	2-Nonanone, 3-(hydroxymethyl)-	Ketone	--	--	67801-33-6	77.16	73900.9	147223	65483.1	94031.7	85187.8	74967.2	140255	110023	96375.9	106580	83582.7	86122.7	48169.1	36272.7	58923.5	23852.2	61546.9	33150.2	79652.7	60420.5	41406.1	43716	69977.4	68043.3	51783	54511.9	61146
XMW1264	238.193	C15H26O2	1615	27.65	1604.35	Acetic acid, 1-methyl-3-(2,6,6-trimethylcyclohex-1-enyl)propyl ester	Ester	--	--	86756-12-9	65.66	5158.44	9520.65	6833.18	4746.92	5536.52	7832.53	21039.9	13316.3	24282.7	19945.9	18893.6	24350.7	8791.15	9654.03	7350.71	6457.09	8684.01	9344.29	11416.5	8242.89	8392.48	12658.6	19357.6	14630.5	6097.29	8844.87	8279.82
XMW1309	136.1	C8H12N2	1089	13.65	1082.63	Pyrazine, tetramethyl-	Heterocyclic compound	--	--	1124-11-4	85.35	55320.1	121814	60899.5	57130.2	65495	70208	1.05556e+06	721123	998926	968092	802414	830861	687443	603097	549922	396493	972422	627058	914548	684008	516240	624187	1.13522e+06	1.08988e+06	566826	512815	520440
XMW1324	146.073	C10H10O	1279	19.04	1266.72	Benzeneacetaldehyde, .alpha.-ethylidene-	Aldehyde	--	--	4411-89-6	86.18	45442.2	84926.6	55629.3	45860	54075.4	60774.5	18265.5	13363.6	20998.7	19490.1	16310.9	16433.2	79595	71977.1	66490.7	49066.5	95313.2	69155.2	63248	43973.7	37107.2	45376.2	62327.6	51642	32612	33908.5	37054.5
XMW1378	134.073	C9H10O	1023	11.53	1013.36	4,6-Octadiyn-3-one, 2-methyl-	Ketone	--	--	29743-33-7	67.6	116689	242625	76228.7	76628.3	62516	90642.2	254286	214572	297755	284382	222122	248308	66155.6	62824.5	80122.3	75987.8	52788.8	43460.9	130692	85743.3	80747.7	93448.4	96943.2	91021.6	99577.5	113907	99140.6
XMW1399	184.219	C13H28	1121	9.97	961.07	Decane, 2,5,9-trimethyl-	Alkanes	--	--	62108-22-9	67.45	91630	105016	105763	108715	98776.8	116286	51342.4	46176.5	121399	109323	59824.5	54137.3	86849.1	69061.5	55306.6	56399.2	70372.2	58814.6	103339	80802	43884.7	47768.3	73995	62875.2	50871.9	53507.7	46574
XMW1405	154.078	C12H10	1486	22.1	1379.55	1,8-Ethylenenaphthalene	Aromatics	--	--	83-32-9	66.46	6359	10390.8	6196.38	5699.29	7590.81	7998.34	141057	92218.2	174917	148654	140762	163462	9663.45	8212.76	7249.83	6289.17	11015.4	9175.15	11965.7	7745.88	6704.04	9701.19	13495.1	9931.64	21914.4	27249.2	28292.6
XMW1408	204.188	C15H24	1398	22.83	1407.08	1H-Cyclopropa[a]naphthalene, 1a,2,3,3a,4,5,6,7b-octahydro-1,1,3a,7-tetramethyl-, [1aR-(1a.alpha.,3a.alpha.,7b.alpha.)]-	Terpenes	--	--	489-29-2	88.94	2.7797e+06	3.85591e+06	1.6275e+06	2.17428e+06	2.68518e+06	2.89997e+06	4.32418e+06	3.20003e+06	6.13122e+06	5.57749e+06	4.83833e+06	4.84365e+06	3.00671e+06	2.51228e+06	2.23054e+06	1.66056e+06	2.50299e+06	2.30694e+06	3.79278e+06	2.68462e+06	2.46398e+06	2.93586e+06	3.11187e+06	2.8881e+06	2.37368e+06	2.49626e+06	2.82989e+06
XMW1412	204.188	C15H24	1389	22.34	1388.39	1H-3a,7-Methanoazulene, 2,3,4,7,8,8a-hexahydro-3,6,8,8-tetramethyl-, (3R,3aS,7S,8aR)-	Terpenes	--	--	65354-33-8	65.24	7424.59	12343.7	4430.94	4931.67	8120.6	7442.22	108229	44529.8	124435	53256.8	61977.5	97275.6	50924.8	36964.6	40963.3	28341.5	44708.8	34766.6	64665.1	45799.5	40806.7	47188.1	69966.5	63978.2	36201.1	45378.7	42713.9
XMW1430	96.021	C5H4O2	832	6.29	826.33	3-Furaldehyde	Aldehyde	--	--	498-60-2	87.14	2.12812e+06	4.25432e+06	1.73747e+06	1.6621e+06	1.82096e+06	2.01005e+06	330863	247057	436455	404322	300133	311617	993789	943517	773853	678923	1.58532e+06	1.26303e+06	680088	552981	351699	426854	749245	790103	573433	562978	529603
XMW1435	222.162	C14H22O2	1466	20.59	1322.75	Isobutyric acid, 2-pinen-10-yl ester	Ester	--	--	29021-37-2	70.34	3738.78	6744.34	3735.01	3129.88	3622.47	4399.84	34909.1	32176	49227	46376.6	45874.8	51682.2	13623.7	12032.8	13284	10403.2	16362.9	9956.05	10106.7	7351.74	6195.26	7308.79	13664.4	11783.2	13897.3	13577.1	15370.2
XMW1472	154.172	C11H22	1140	21.38	1352.31	Cyclohexane, 1-ethyl-2-propyl-	Alkanes	--	--	62238-33-9	63.33	117657	261153	134768	113225	131502	143050	48640.2	32526.3	49358.2	43534.2	39961.5	47196.2	180672	162233	144425	113645	216460	150160	207238	153800	122184	153517	235266	203489	103372	104809	100905
XMW0906	134.11	C10H14	975	10.85	990.83	Benzene, tert-butyl-	Aromatics	--	--	98-06-6	72.49	185870	249225	129361	162534	42418.2	56443.9	282958	283544	304765	288247	188243	169917	92034.4	102182	65835.5	54037.9	95329.7	91372	170456	137630	59989.5	71559.4	234997	272561	112270	105886	112622
D266	182.203	C13H26	1292	24.97	1492.21	1-Tridecene	Olefin	--	--	2437-56-1	90.43	2.1246e+06	3.13716e+06	1.44622e+06	1.2664e+06	1.87416e+06	2.21177e+06	4.58129e+06	3.17205e+06	6.0318e+06	5.32985e+06	4.87861e+06	5.30511e+06	1.34303e+06	1.16478e+06	1.10927e+06	902042	1.18863e+06	1.29441e+06	1.93011e+06	1.27381e+06	1.4086e+06	1.82528e+06	1.87086e+06	1.71727e+06	1.5234e+06	1.88361e+06	1.94947e+06
D289	172.146	C10H20O2	1110	18.13	1234.65	n-Amyl isovalerate	Ester	--	--	25415-62-7	69.61	198086	462034	185056	162568	203794	214812	361837	232584	339378	340169	290101	316227	101077	83201.7	85050.8	59906.6	130371	84974.4	121069	93121.2	83549.4	109092	175094	152252	143002	151689	151128
D411	186.162	C11H22O2	1143	21.06	1340.58	4-Methylpentyl 2-methylbutanoate	Ester	--	--	35852-40-5	75.85	28918.6	63528.3	35728.3	21533.4	35605.6	41050.6	92230.8	55495.4	97362.1	83364.1	85209.1	103630	18699.2	14046.3	12697.2	13465	19672.4	20494.9	28542.4	19586.7	20130.3	28937	46310.5	41571.2	28852.5	33729.6	30734.1
D457	200.178	C12H24O2	1189	19.53	1284.13	1-Hexanol, 5-methyl-2-(1-methylethyl)-, acetate	Ester	--	--	40853-55-2	79.72	31270.3	41830.8	24672.7	38501.8	26749.7	25313.1	27517.6	18598.5	39005.9	32503.7	20237.4	18844.3	28175.7	21605.6	23382.7	12618.2	22350.8	18504.3	28732.7	20858.4	14194.5	15393.7	26202.1	26125.6	17111.3	19848.9	21420.7
