# Supplementary figures and images for: Identification of a secondary Q-marker in high-quality ecotypes of Carthamus tinctorius L. and exploration of the target preference
Source: Royal Society of Chemistry journal article supplement (doi:10.1039/d2fo02596e), 2023-01-01

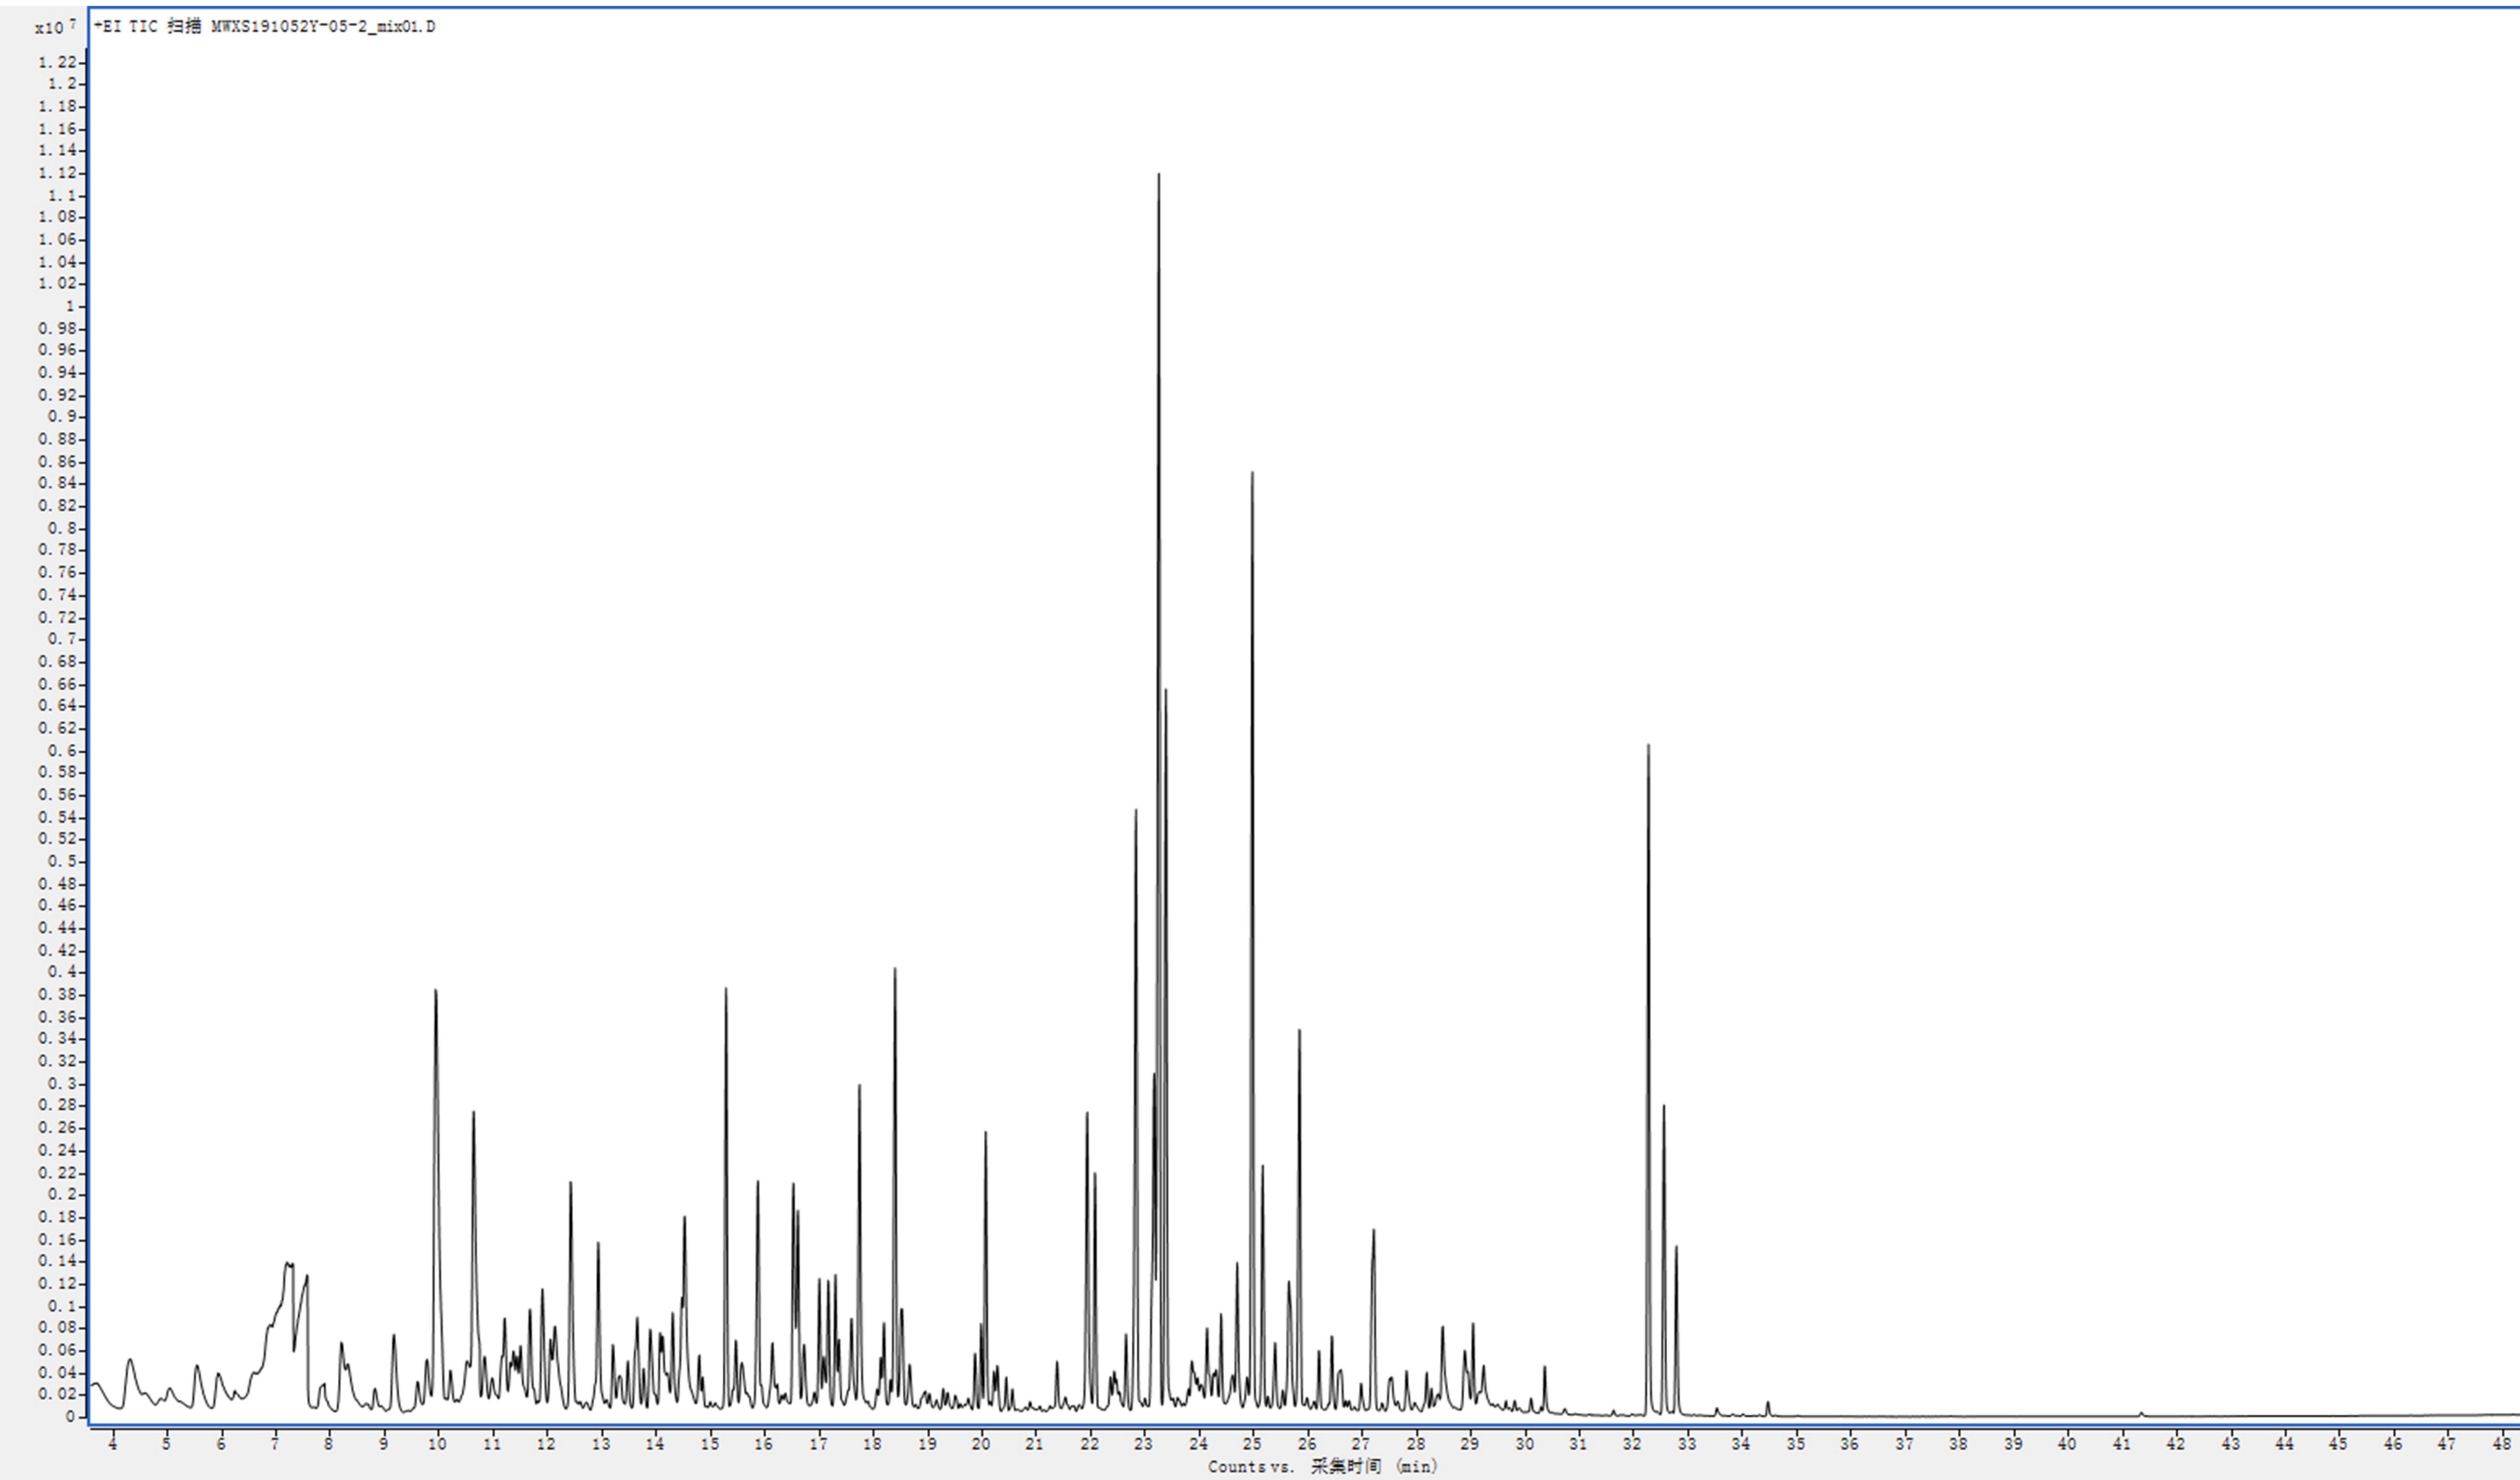

(A)

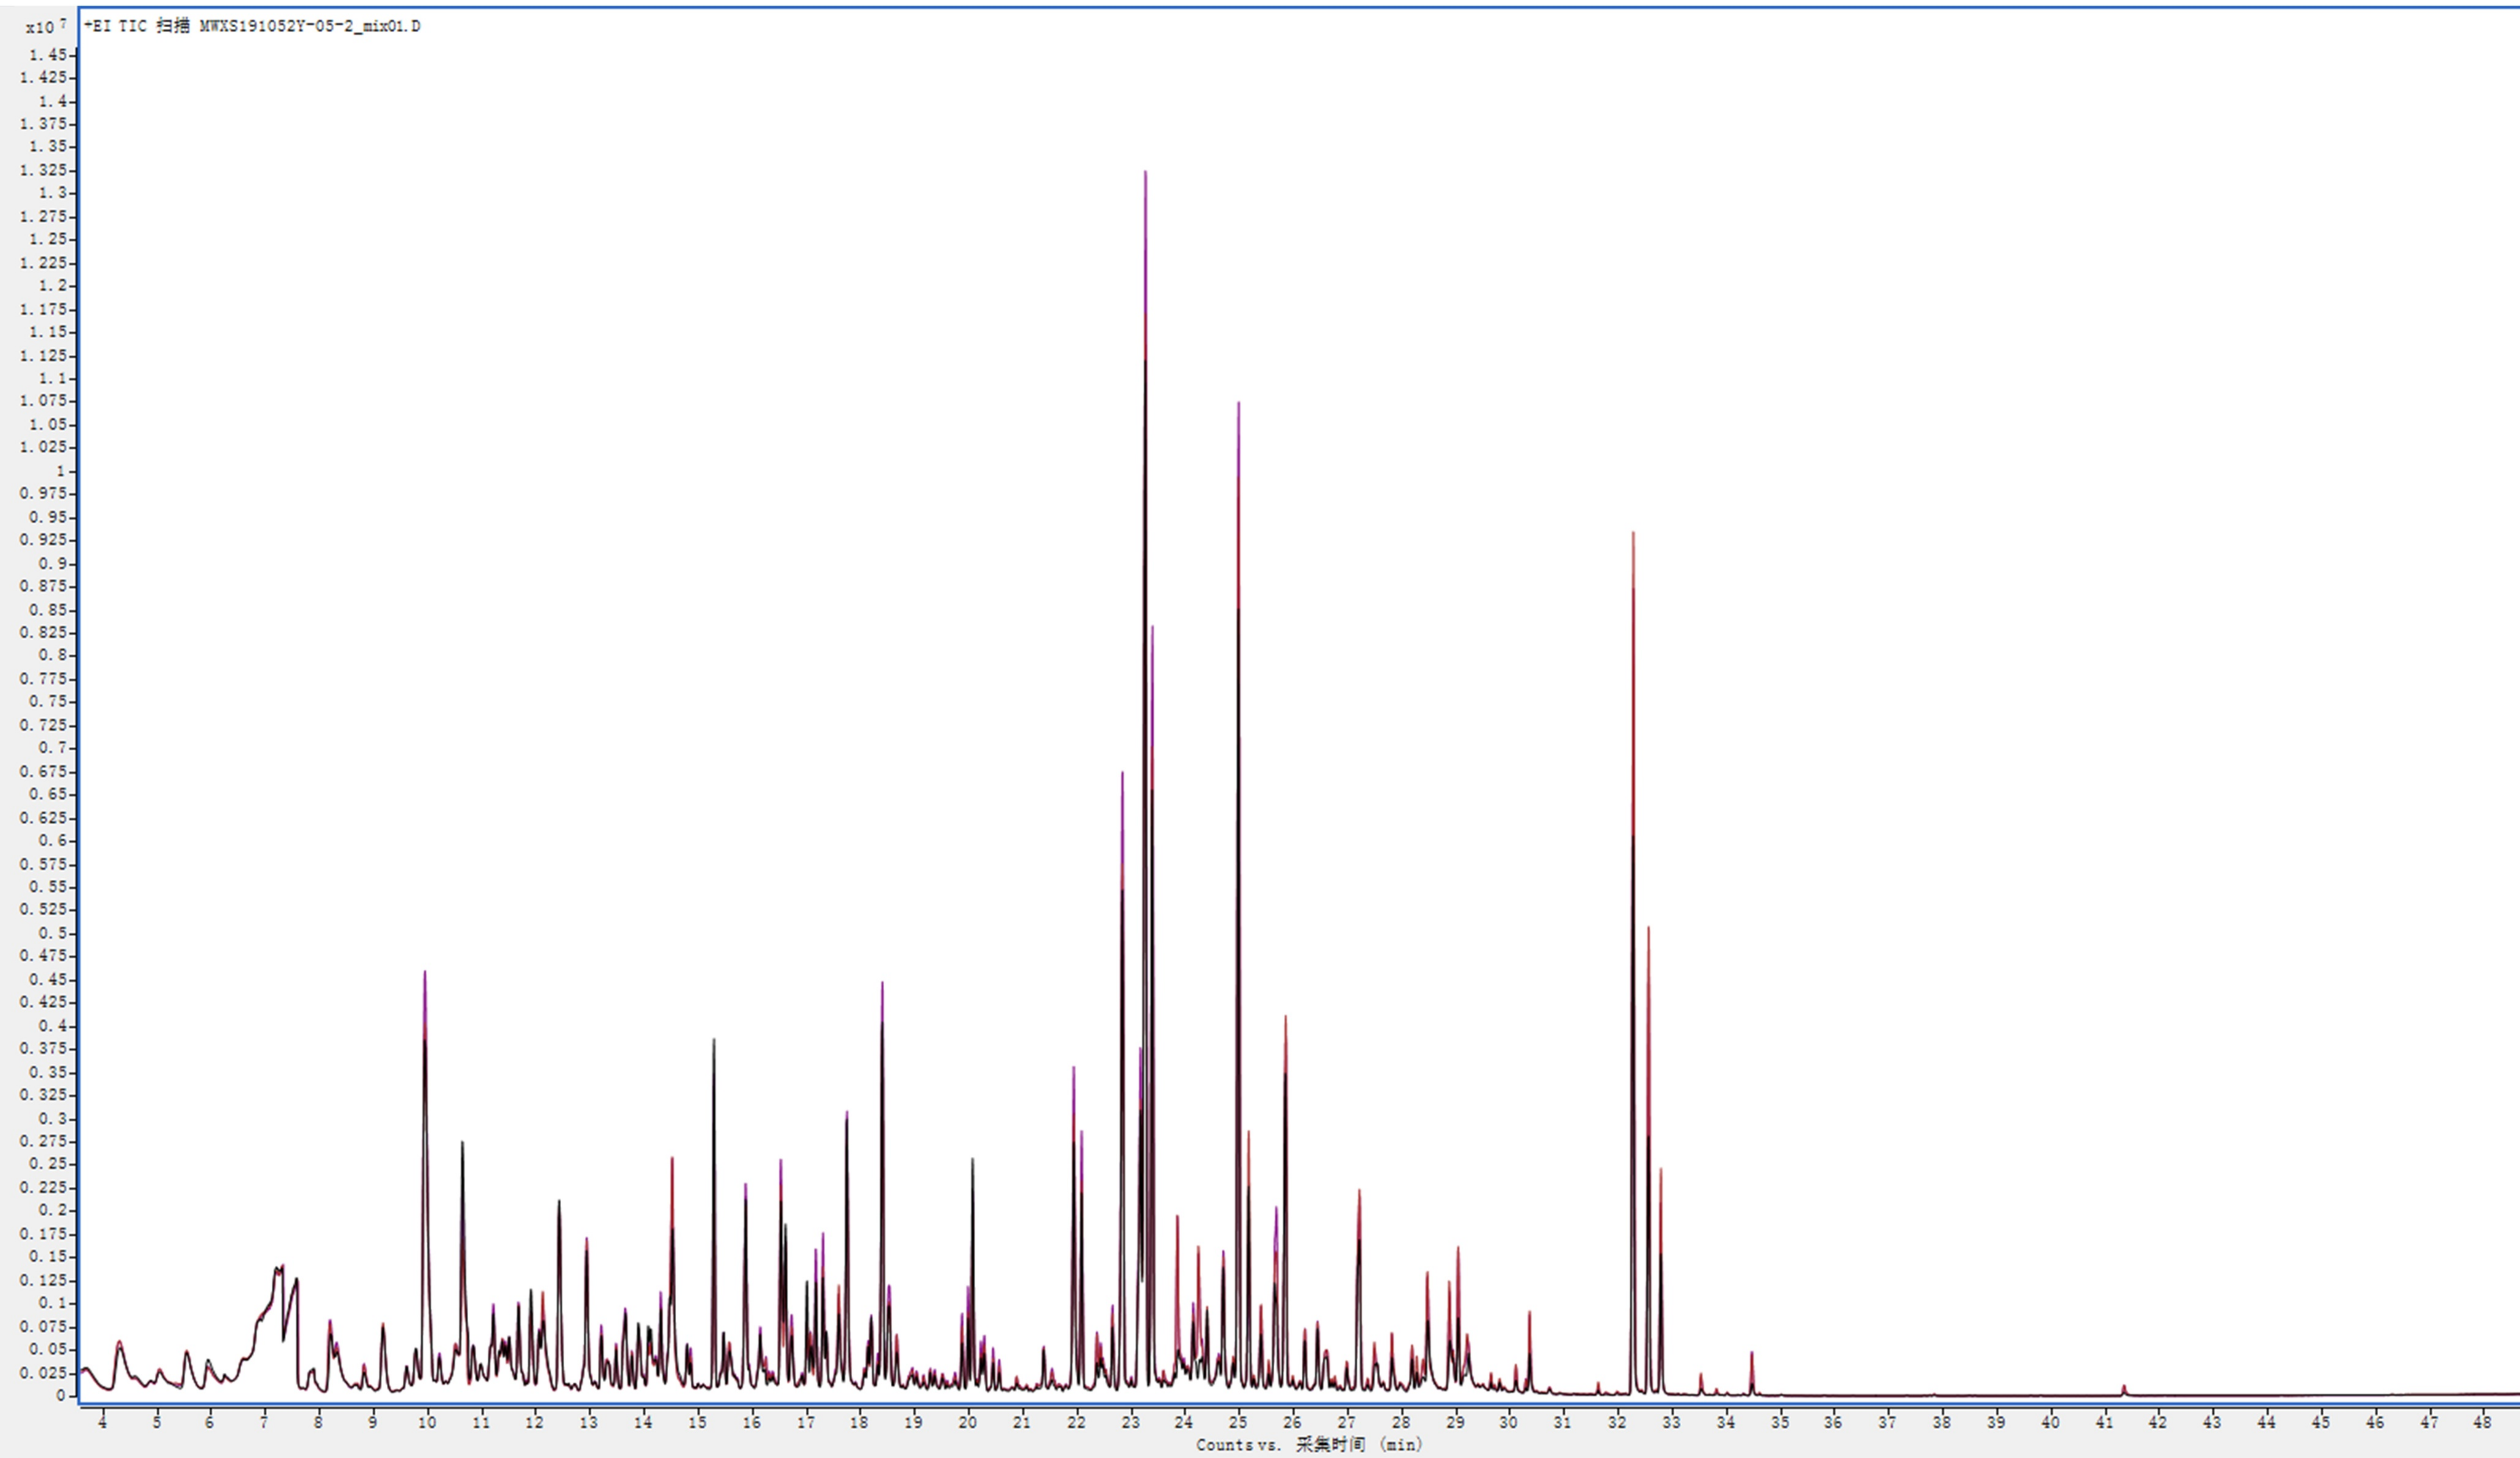

(B)

Supplement: d2fo02596e5.pdf [file d2fo02596e5.pdf]

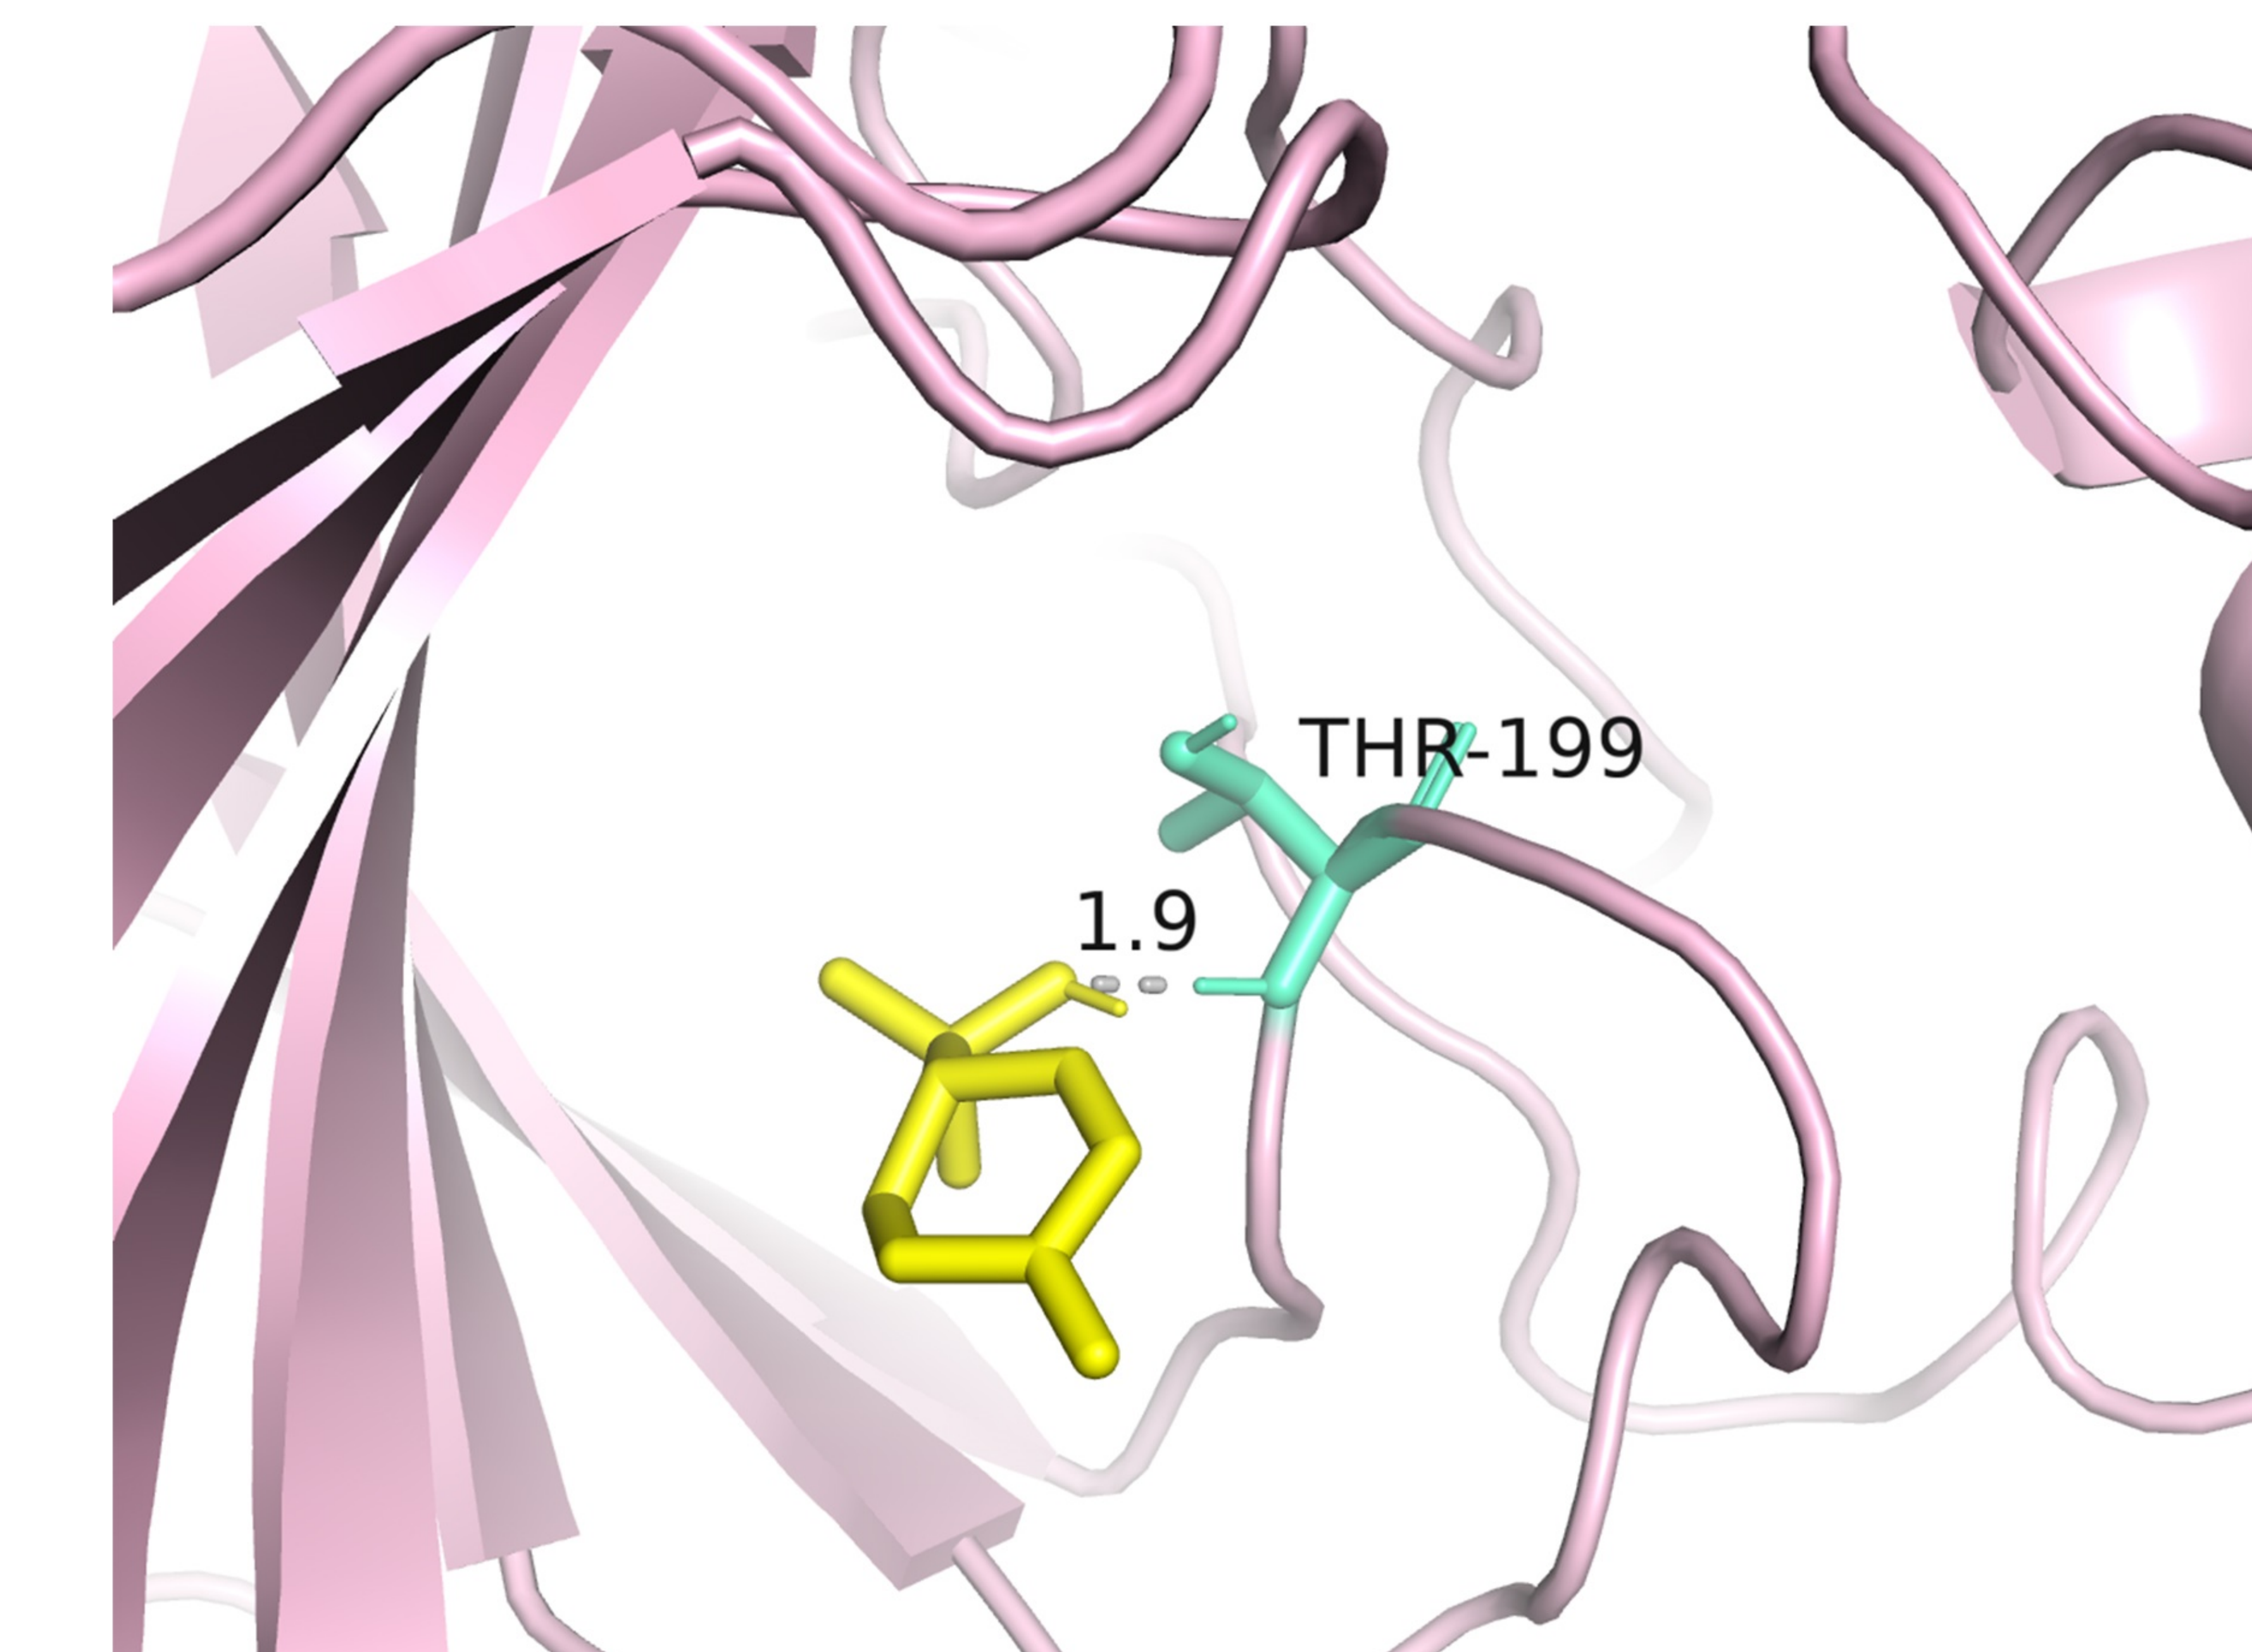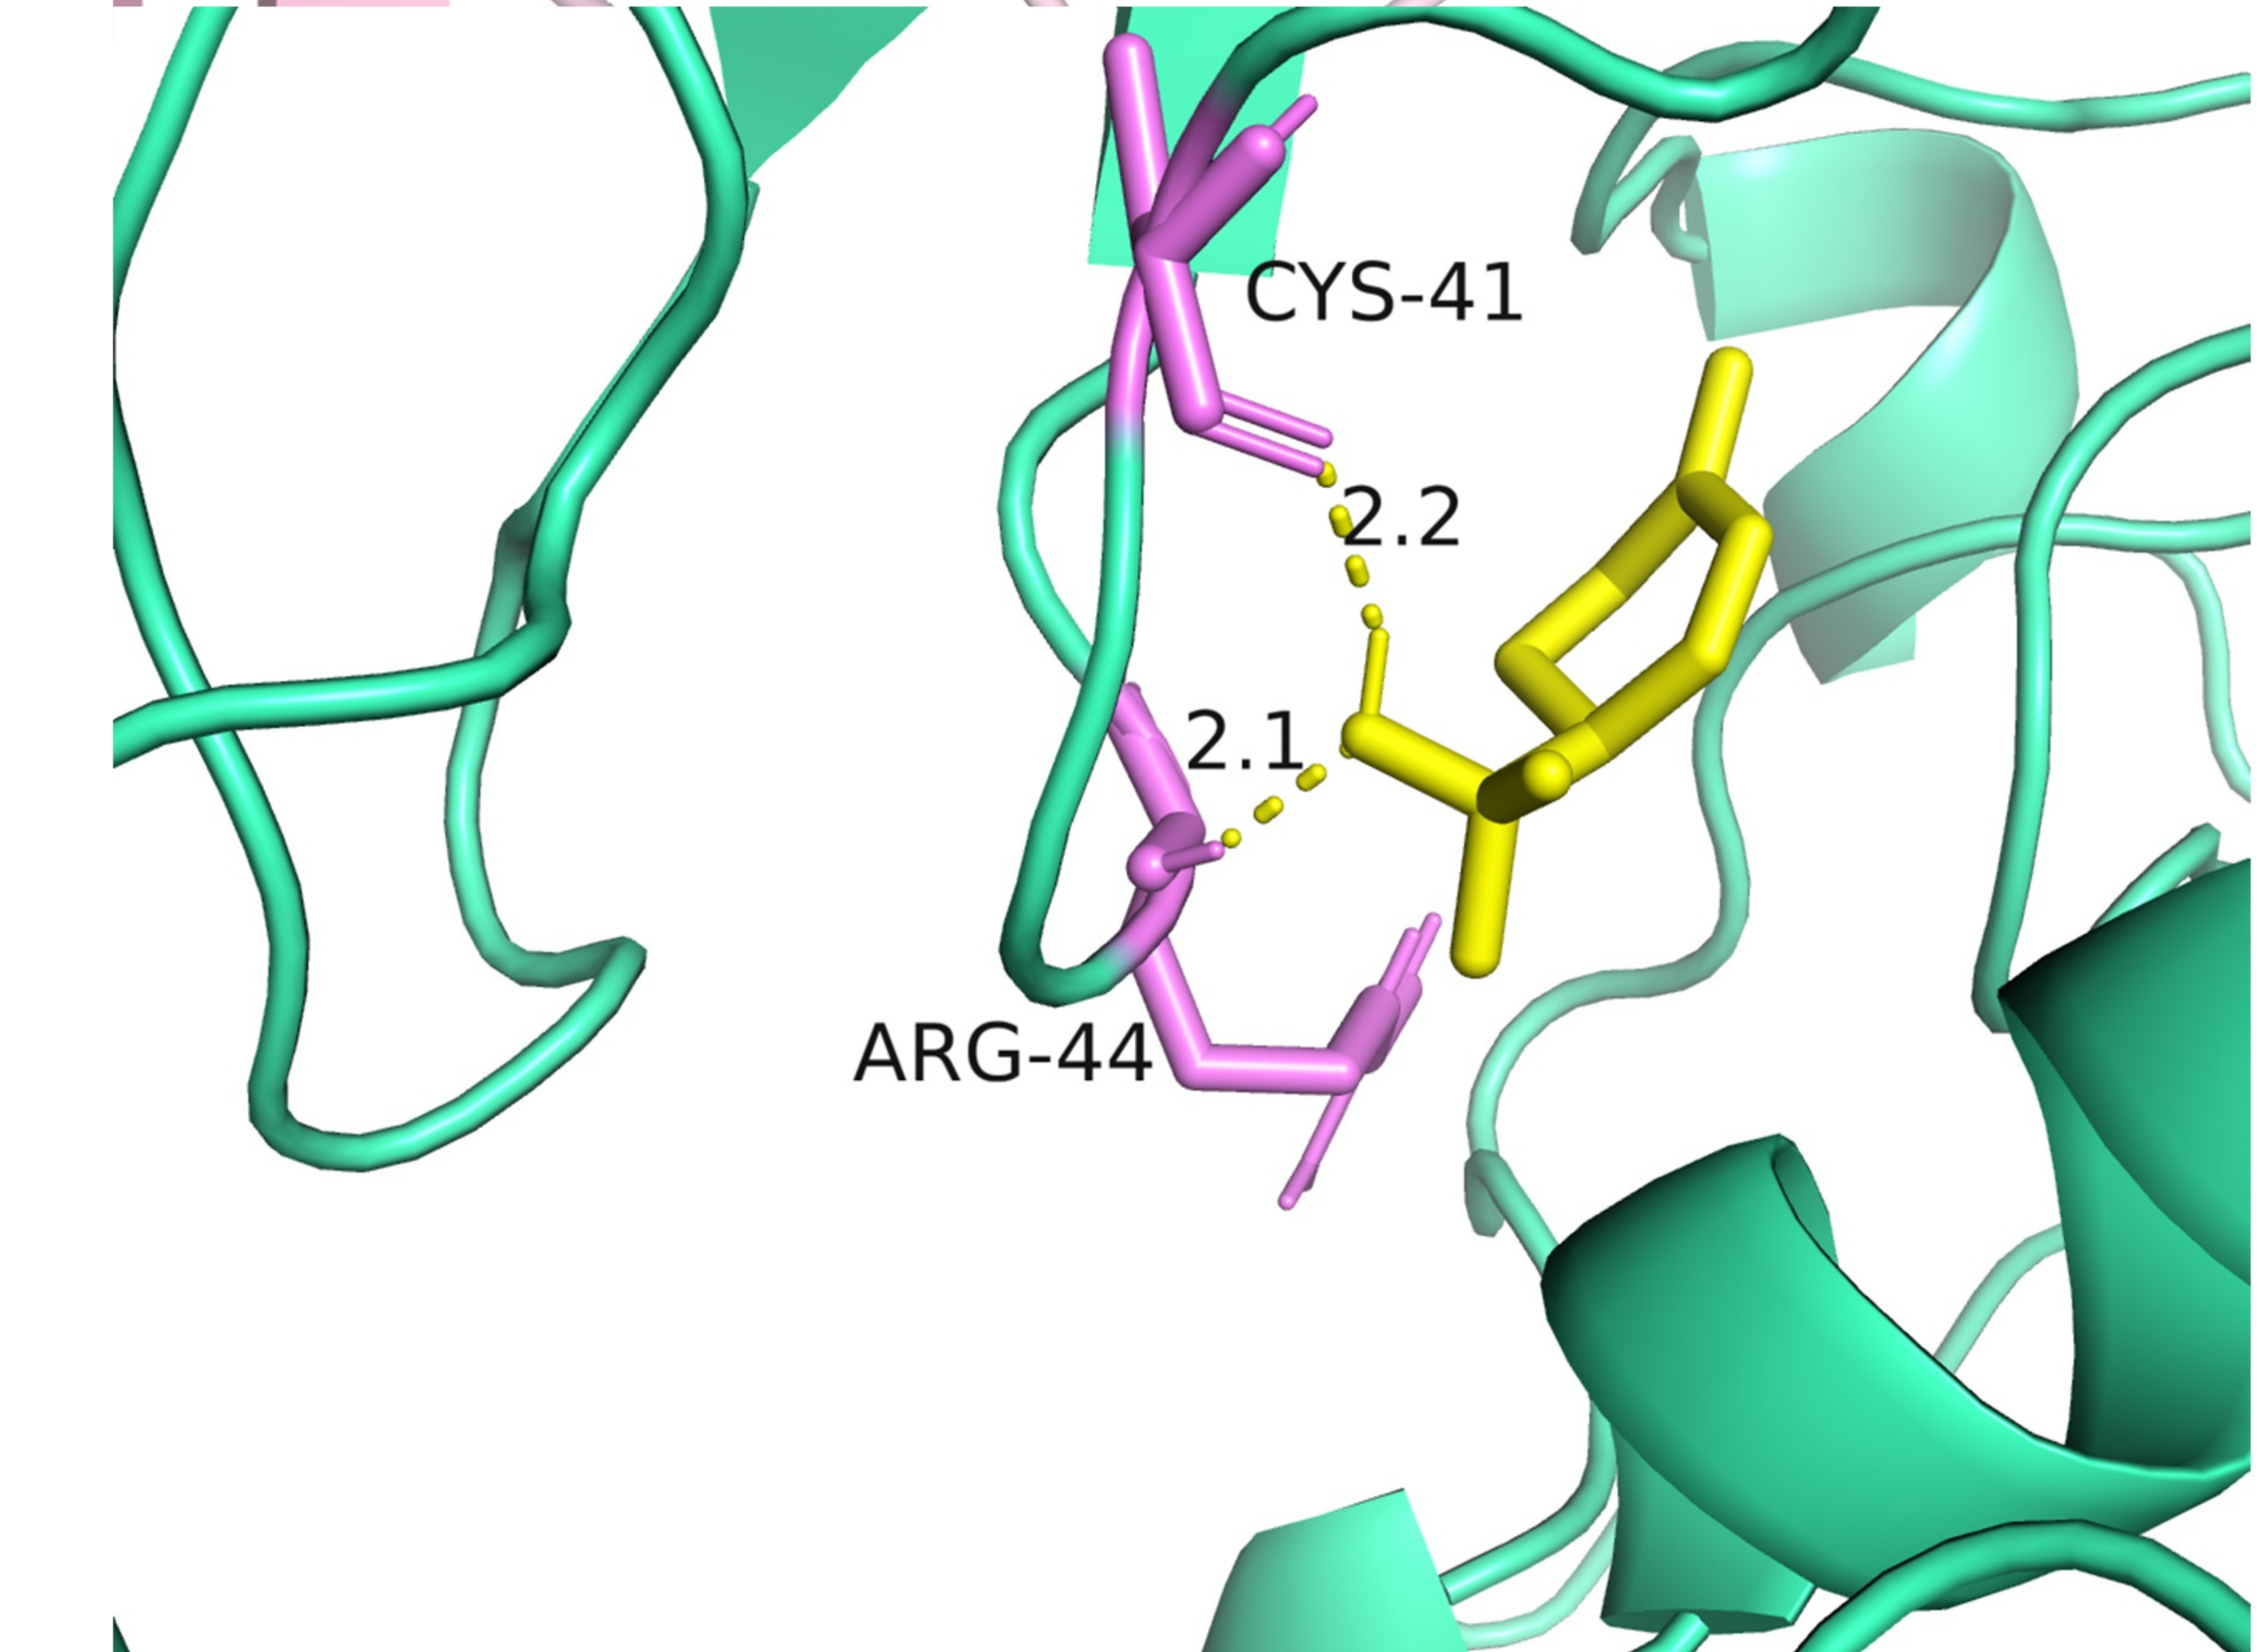

**(A)** Guaiacol

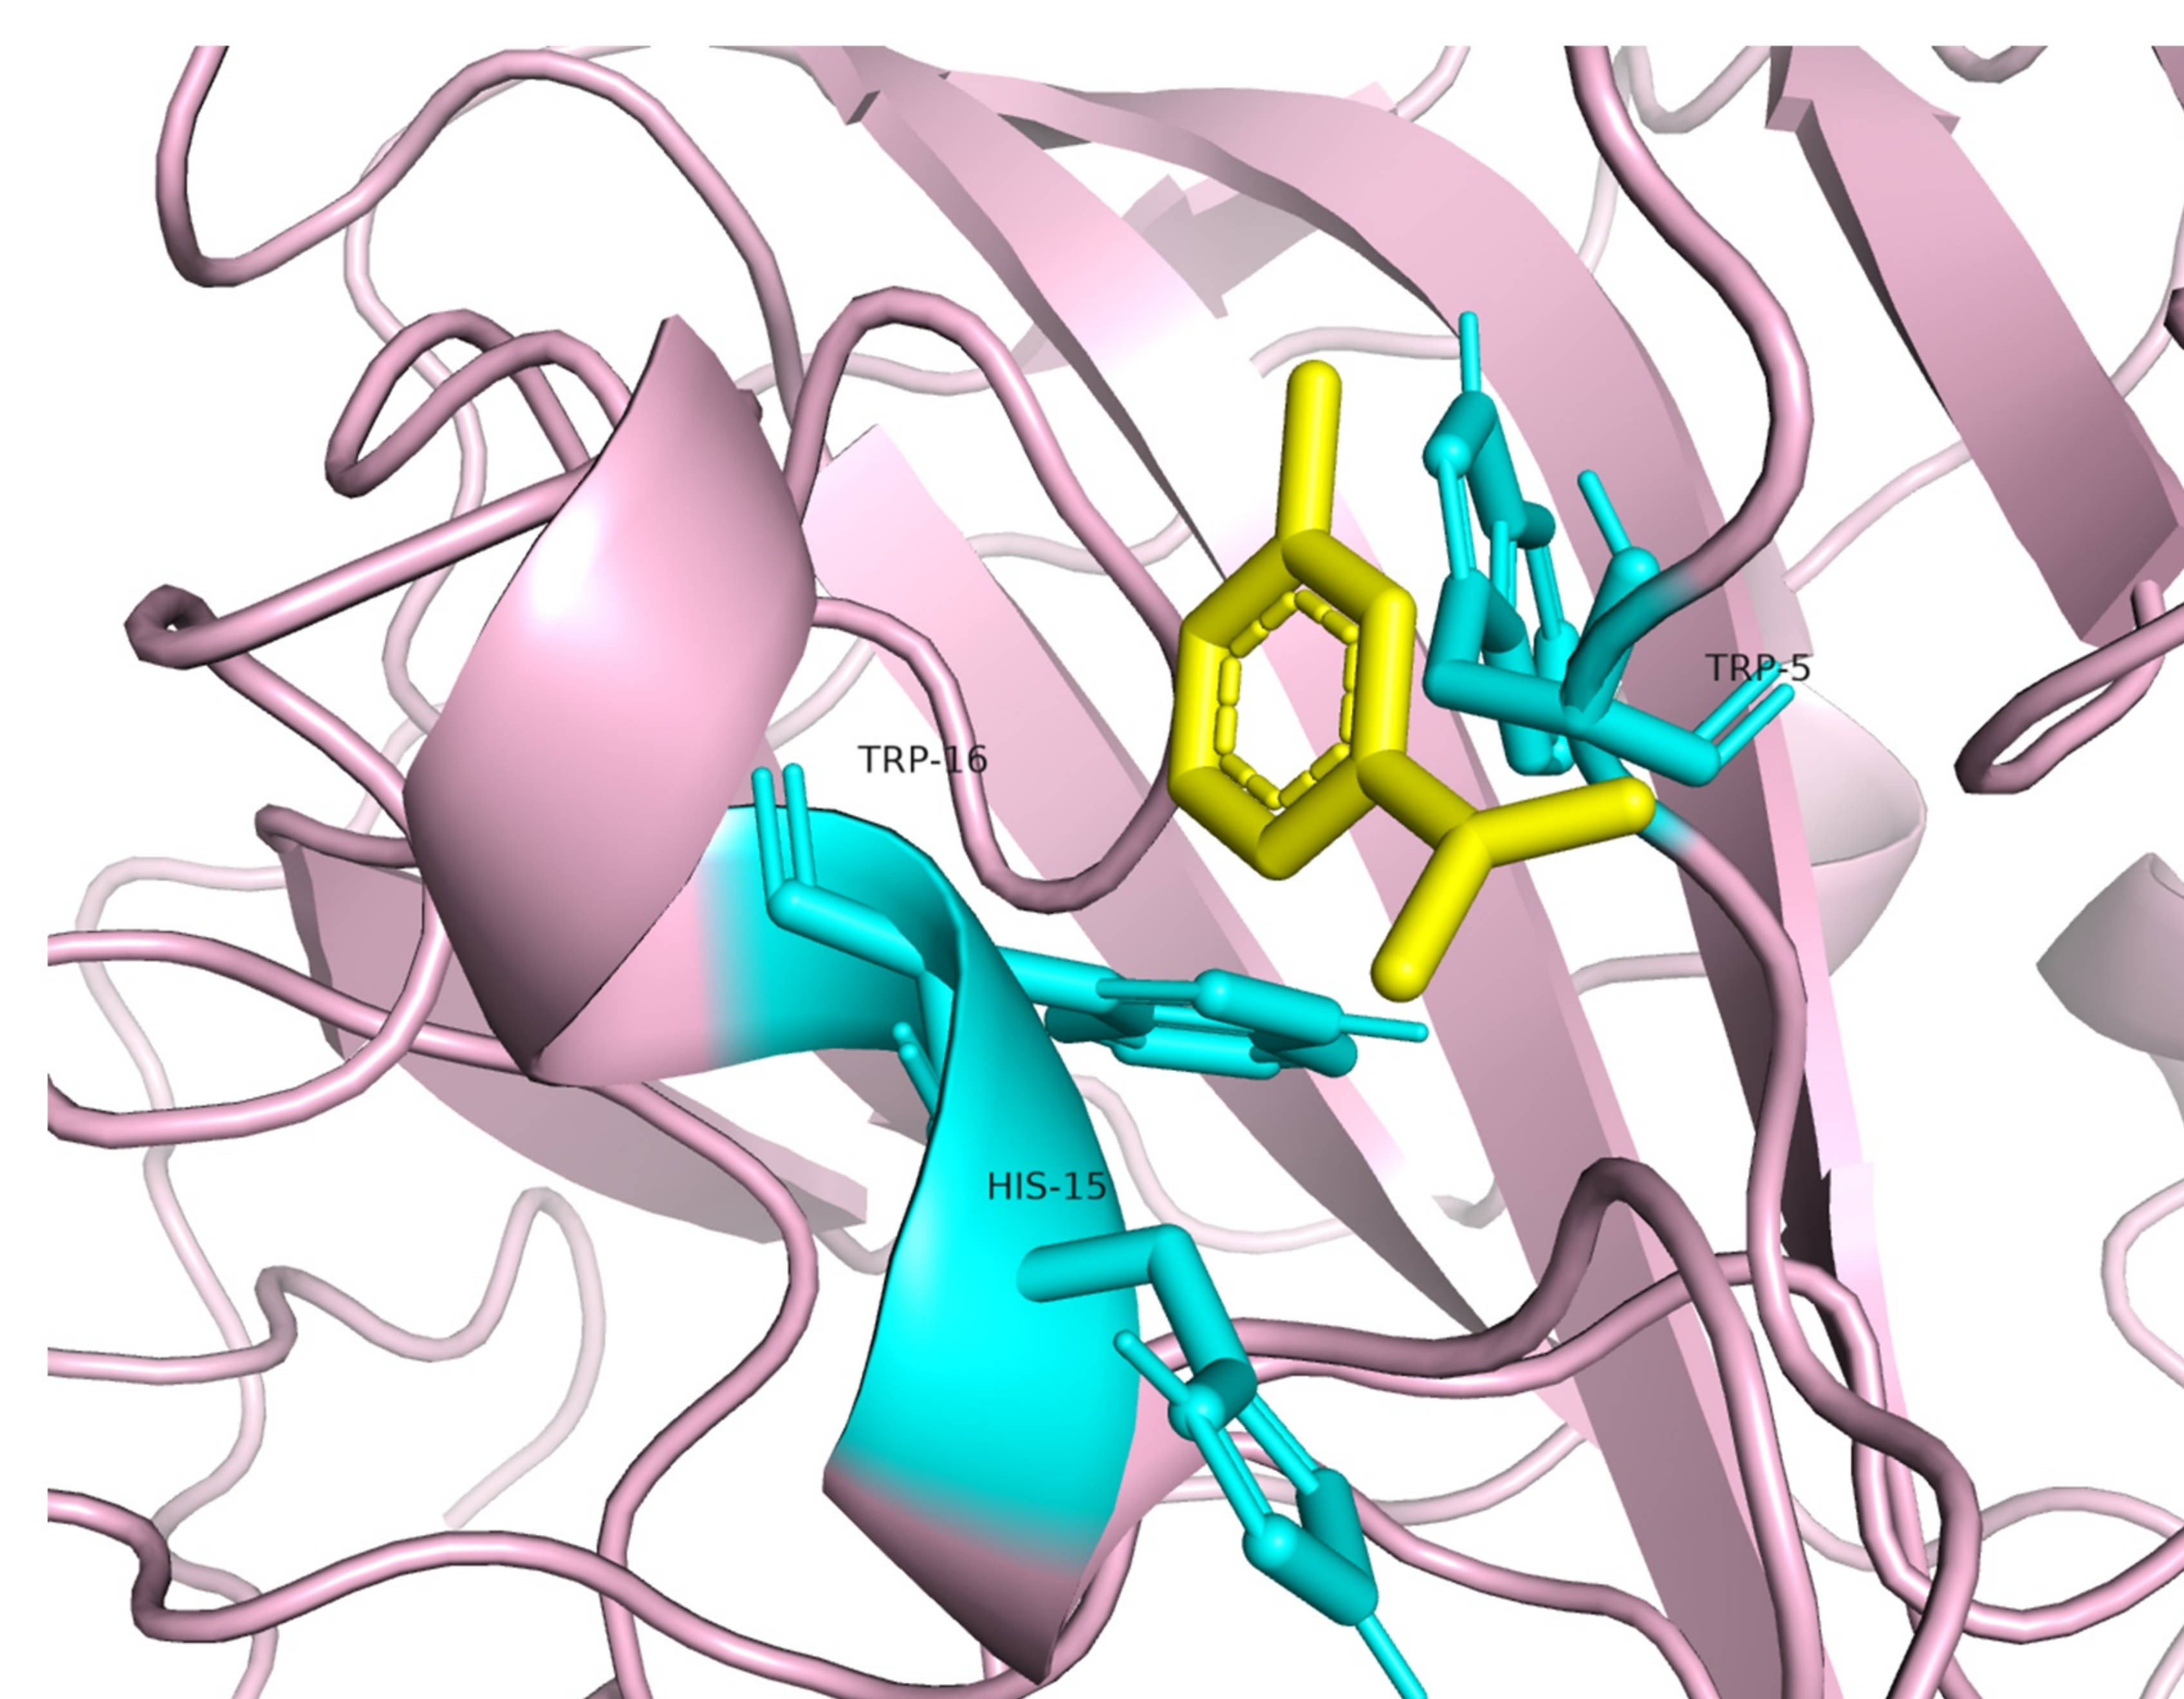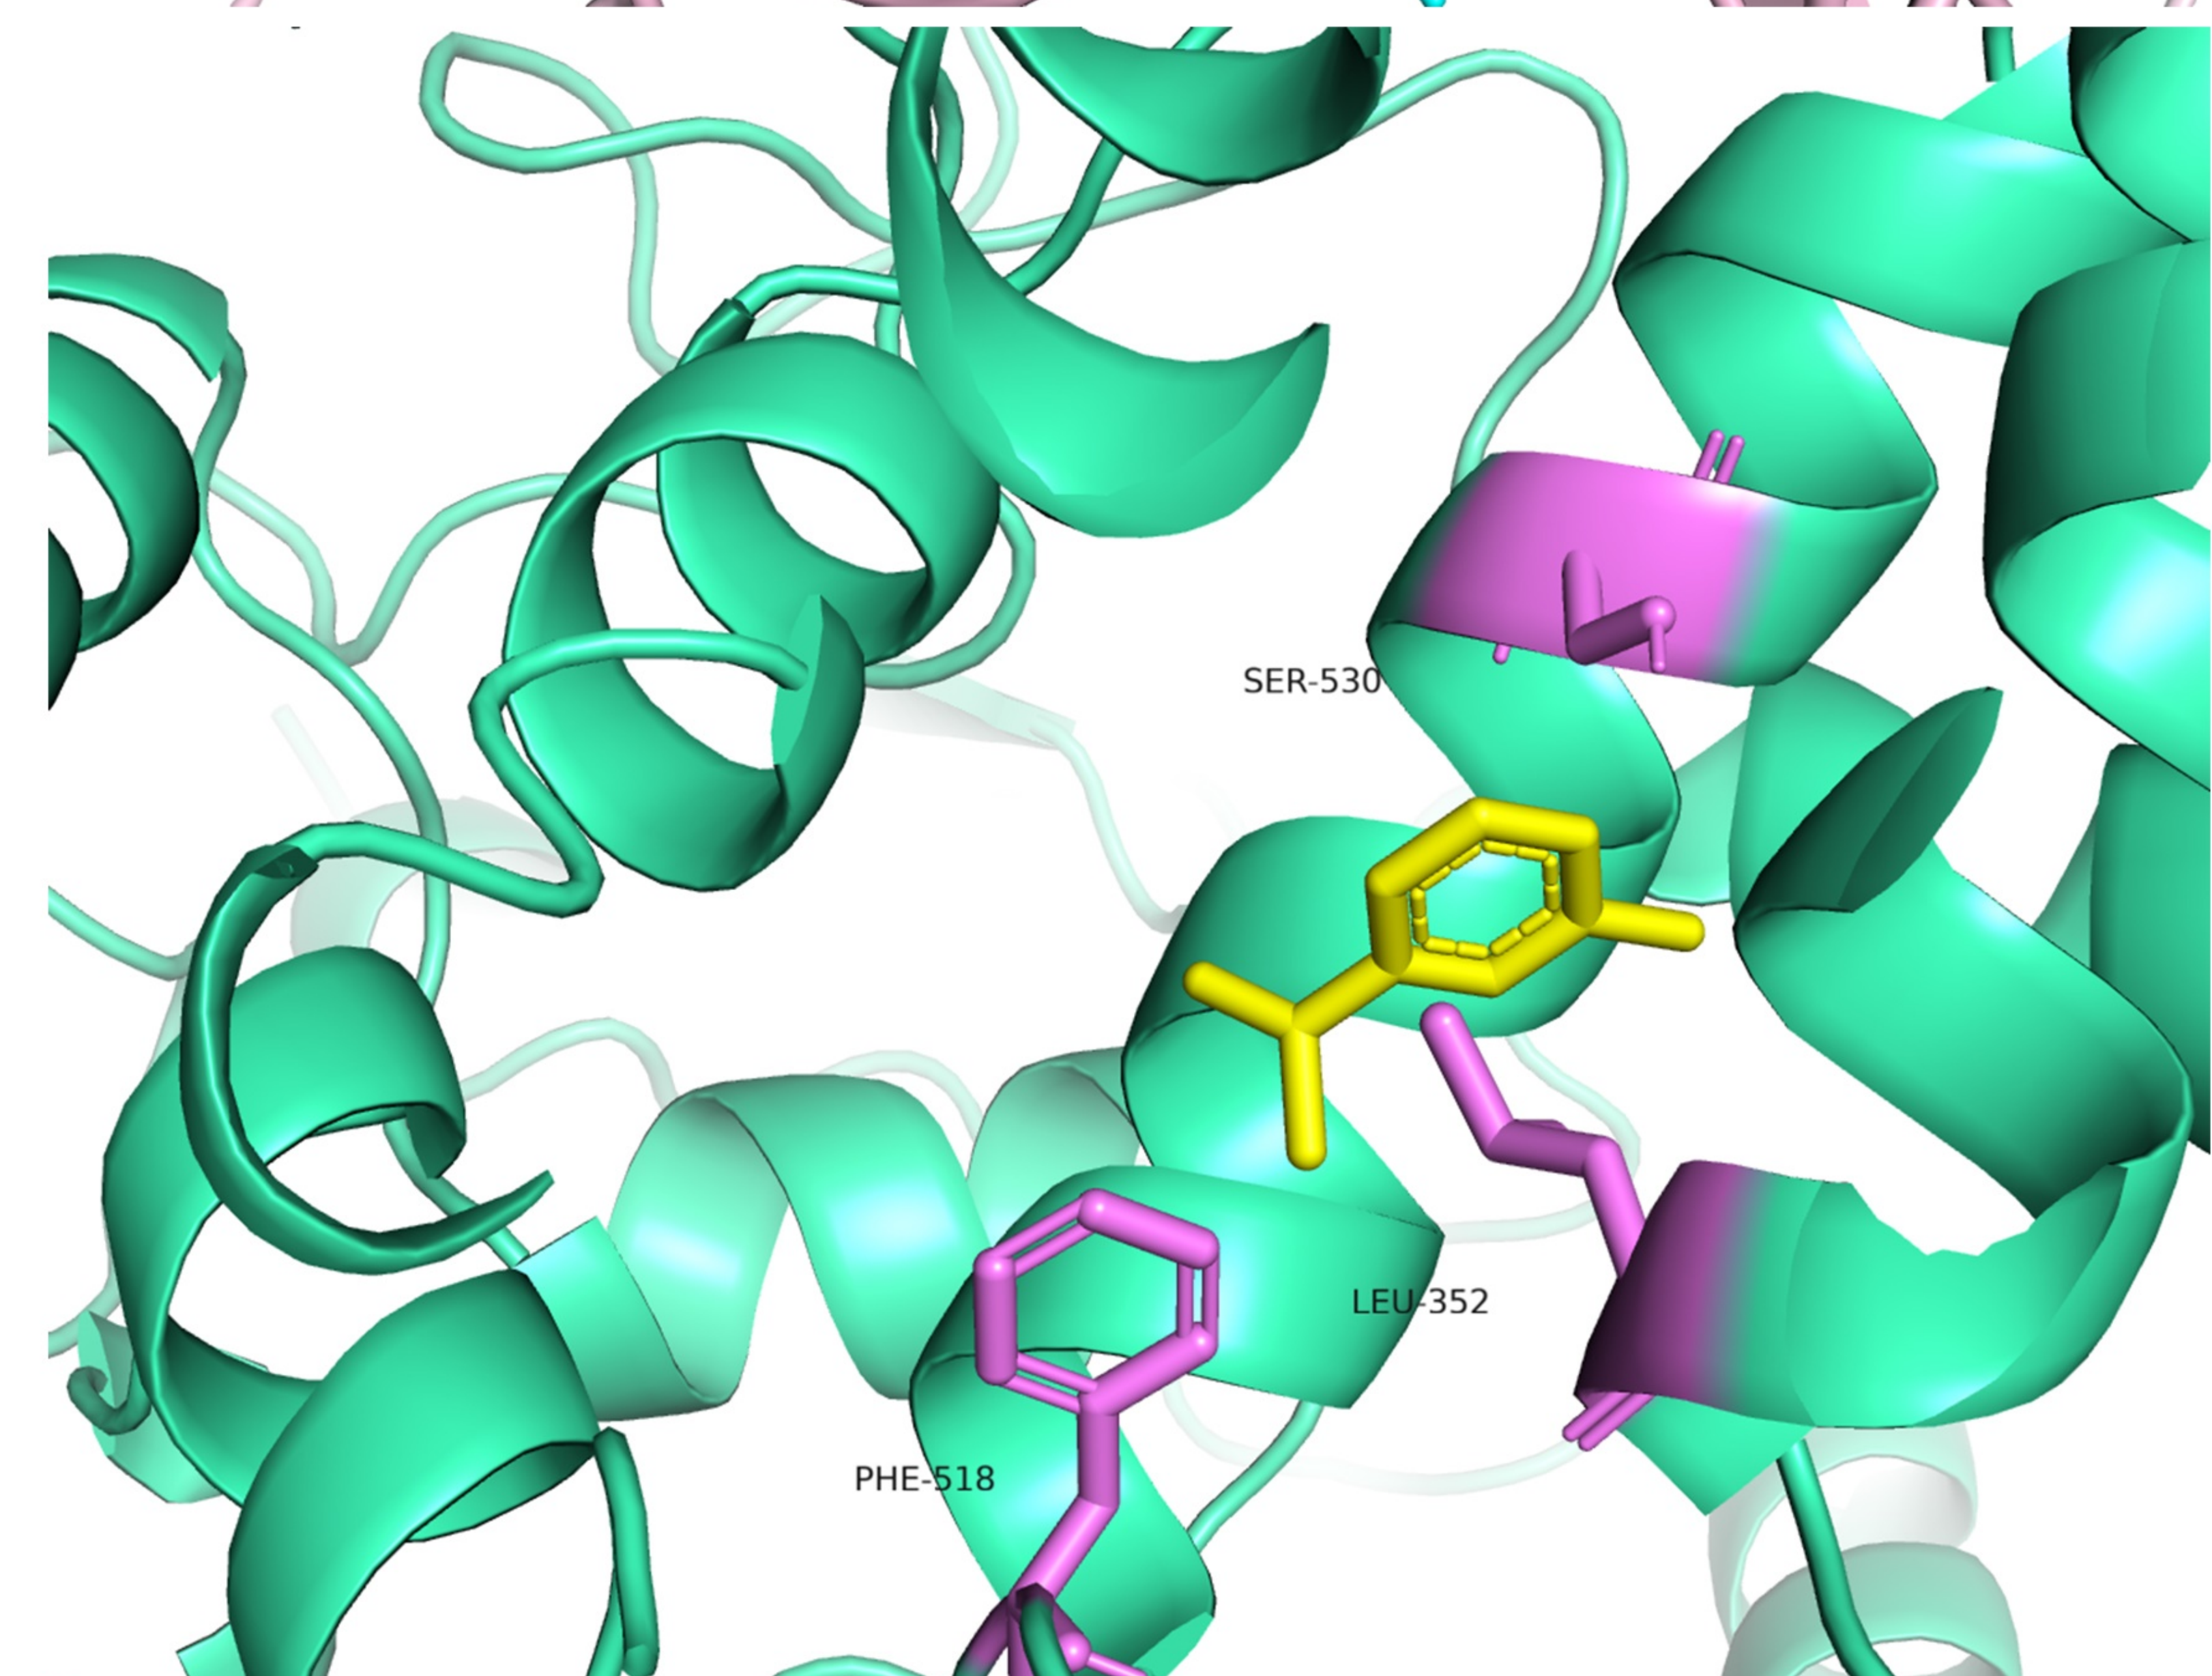

**(B)** M\_Cymene

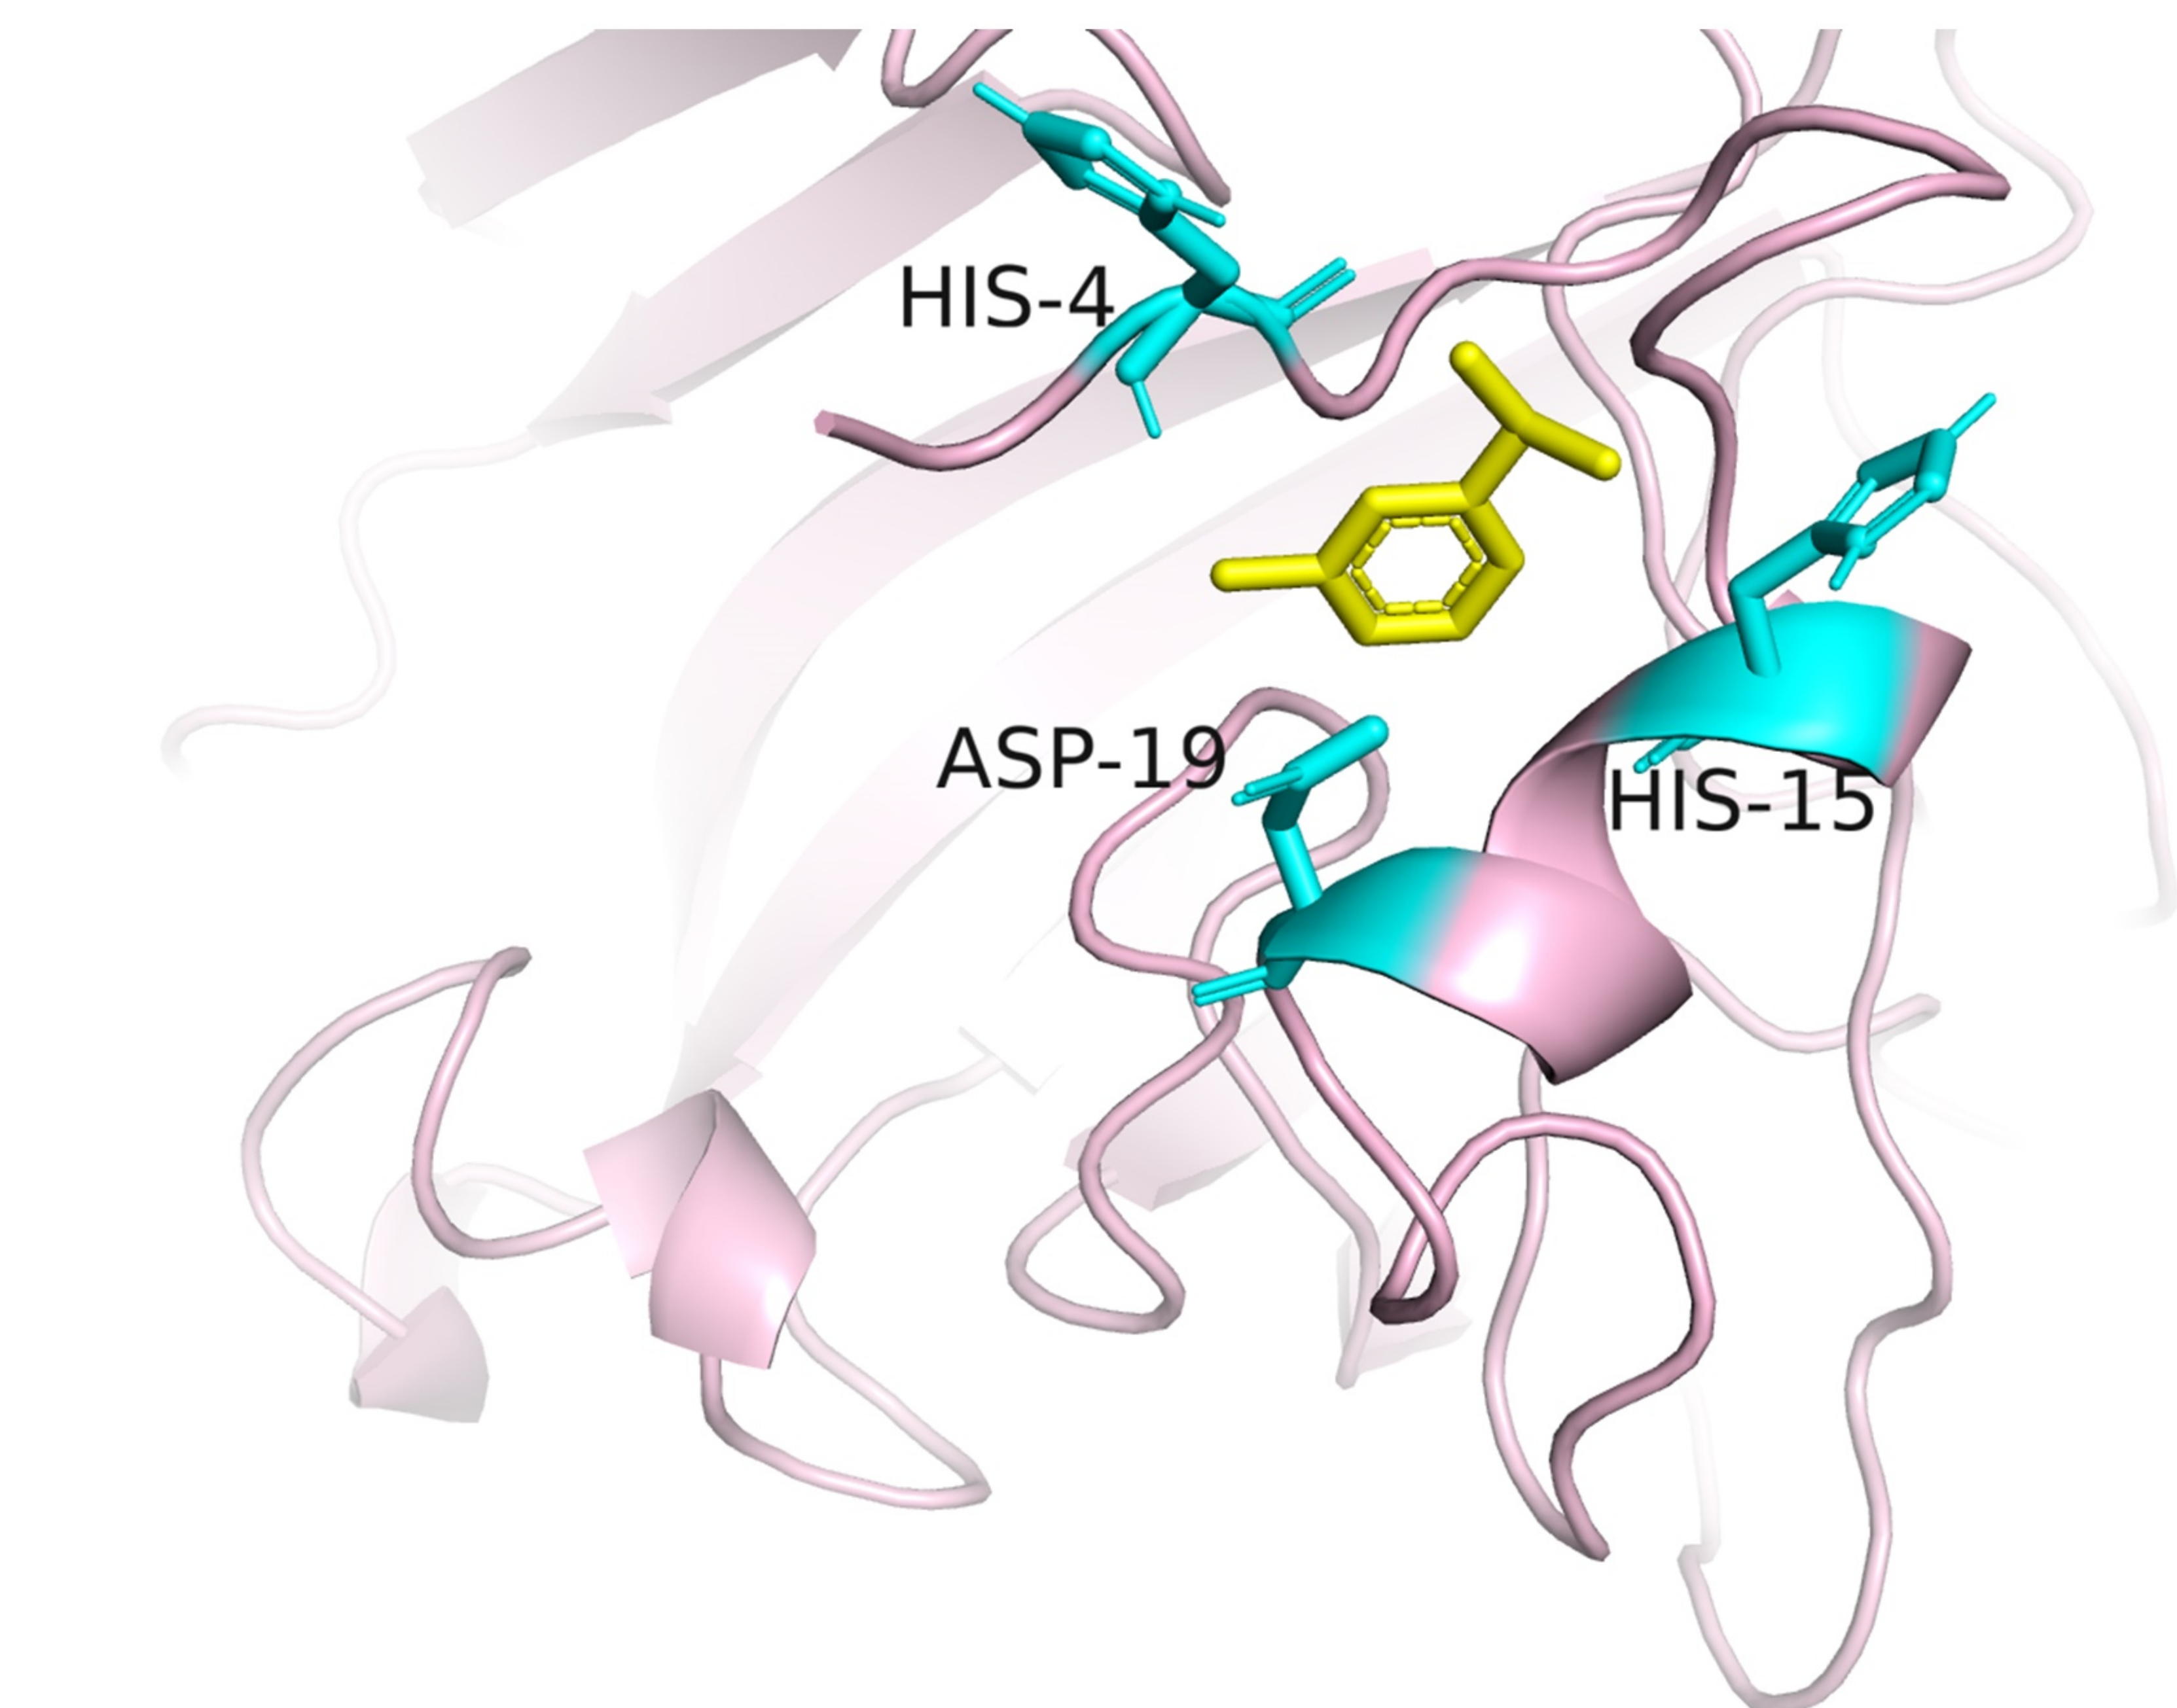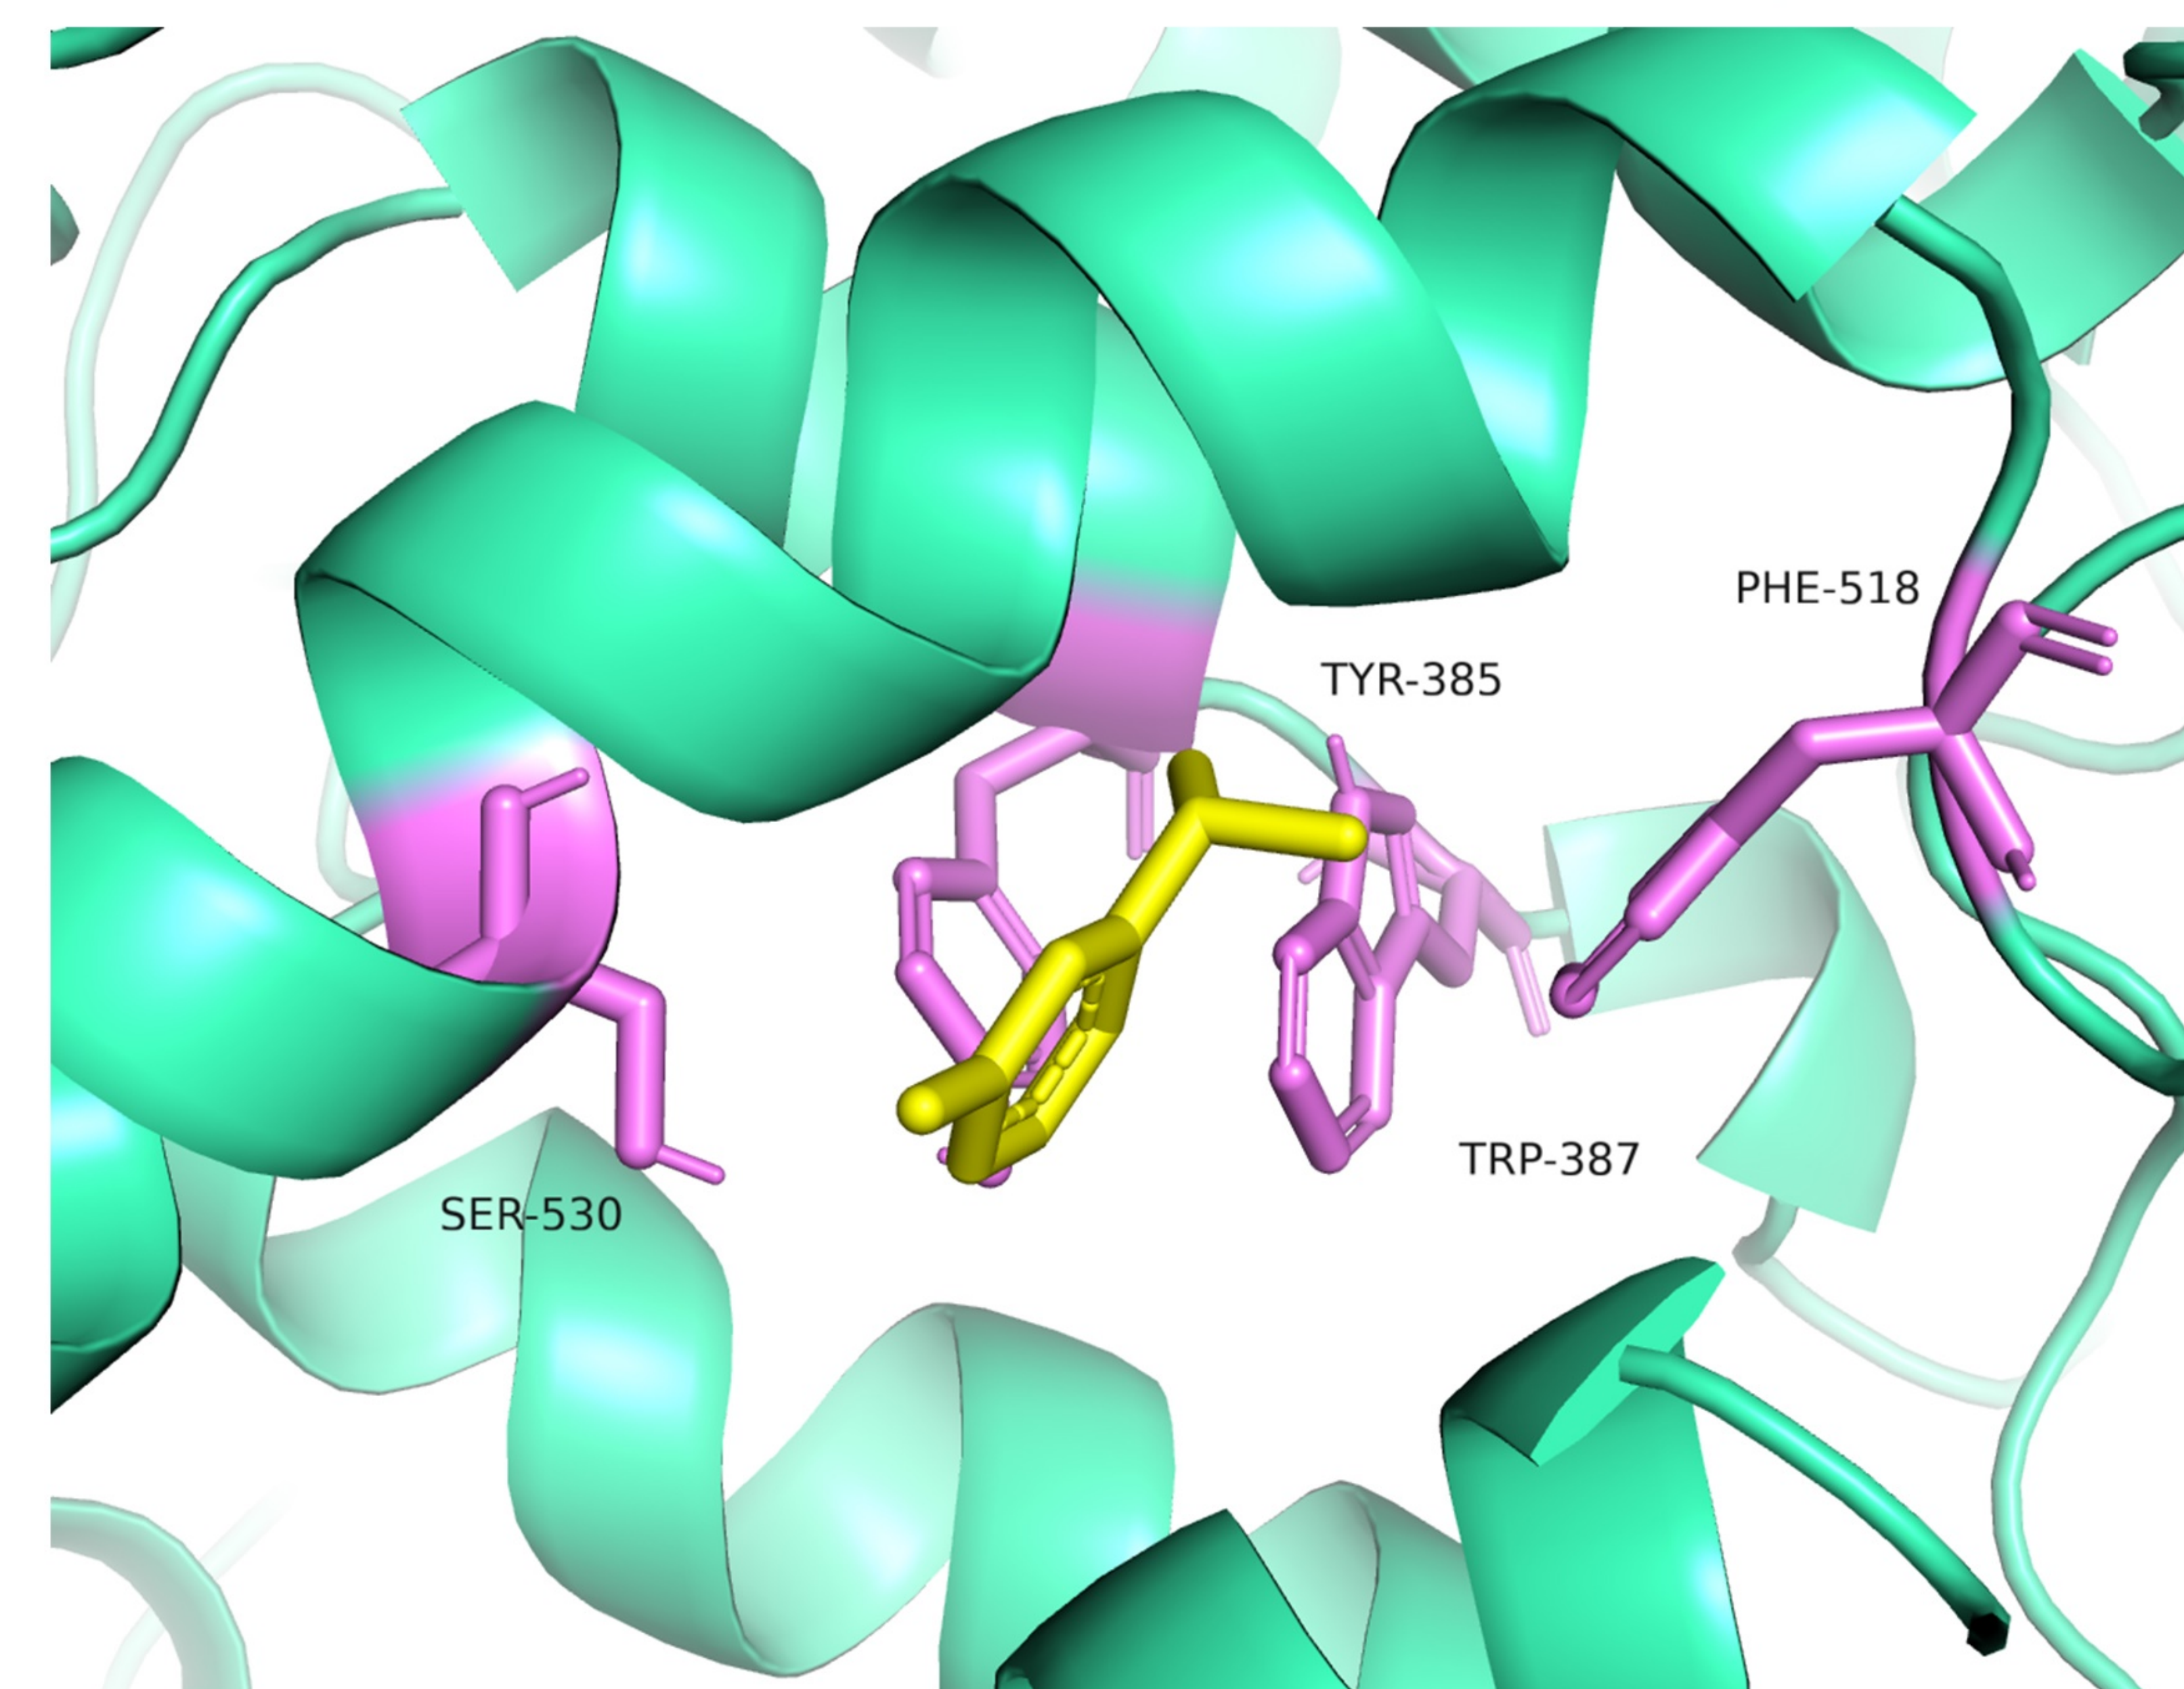

**(C)** m\_Isopropenyltoluene

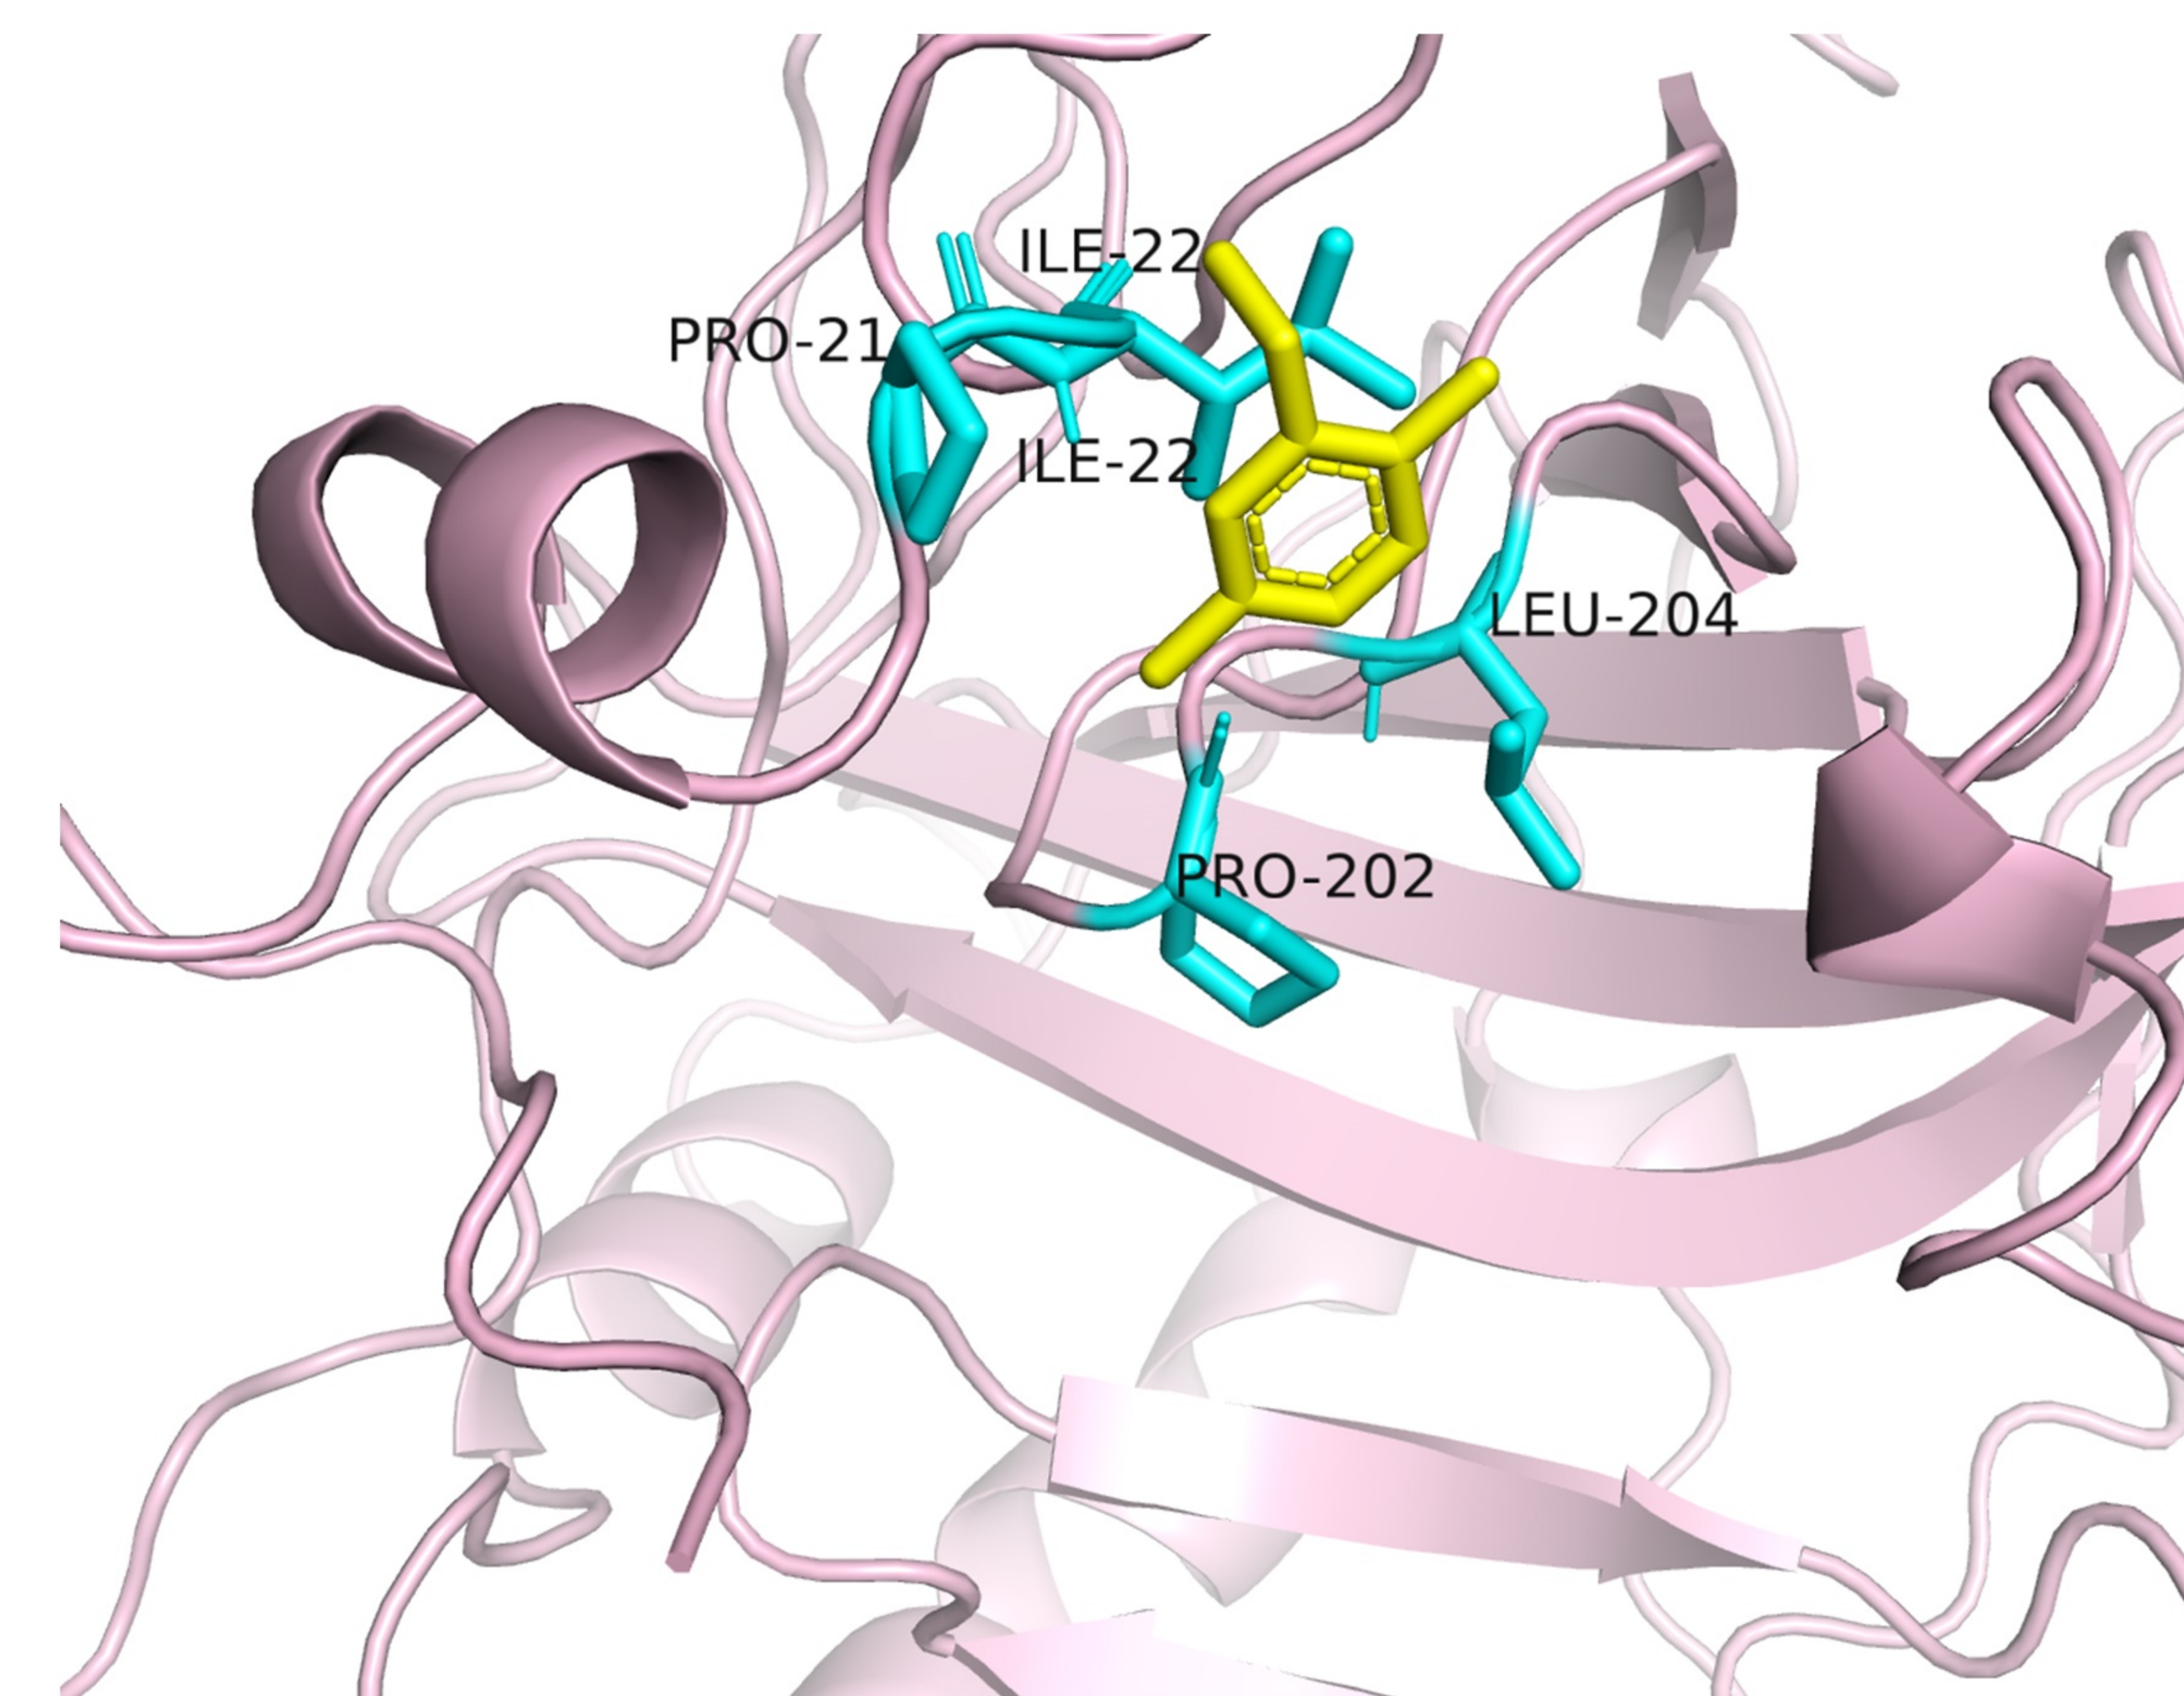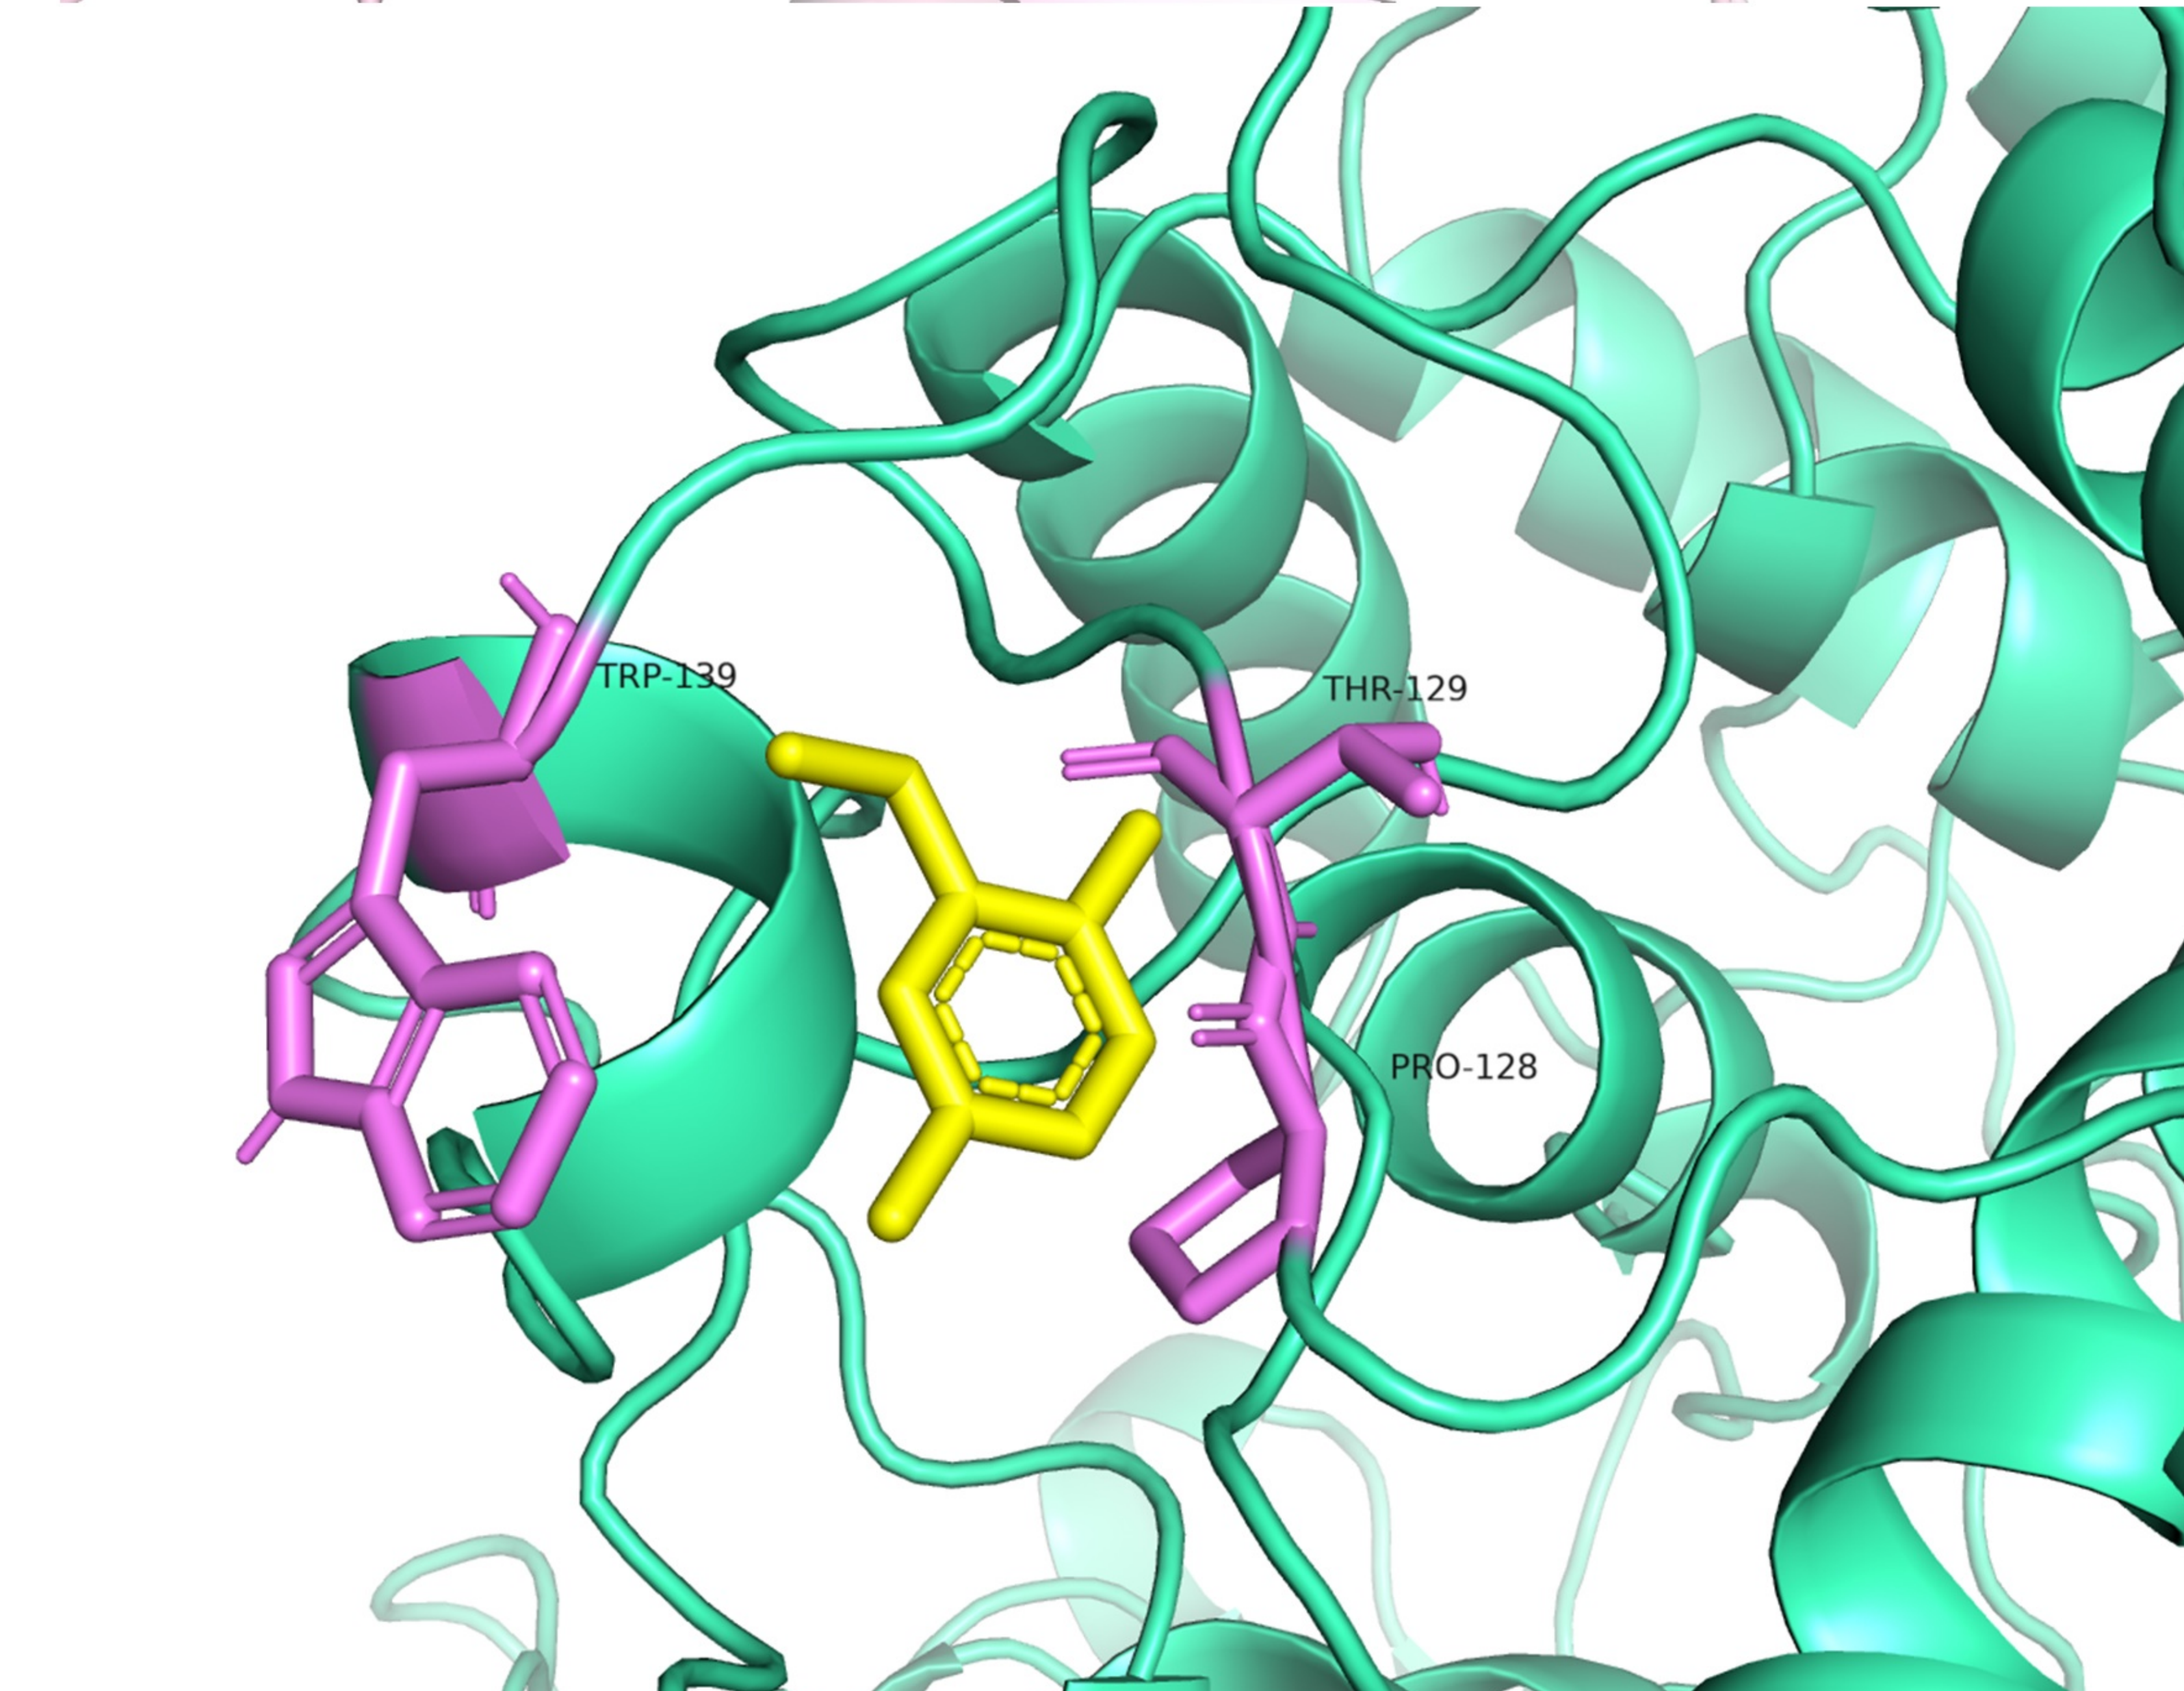

**(D)** p\_Mentha\_1(7)\_  
2\_dien\_8\_ol

**CA2  
(6odz)**

**PTGS2  
(5ikv)**

Supplement: d2fo02596e7.pdf [file d2fo02596e7.pdf]
